# Supplementary material
Source: PubMed Central journal article supplement (PMC1810344)

Supplementary Table 1. Genes with higher expression in Olig2 KO vs WT NSCs

| Gene ID | Gene Symbol | Gene Name                                                                                           | Average Fold Change (log2) |
|---------|-------------|-----------------------------------------------------------------------------------------------------|----------------------------|
| 13184   | Dcpp        | demilune cell and parotid protein                                                                   | 7.95                       |
| 30937   | Lmcd1       | LIM and cysteine-rich domains 1                                                                     | 6.53                       |
| 19734   | Rgs16       | regulator of G-protein signaling 16                                                                 | 6.06                       |
| 13184   | Dcpp        | demilune cell and parotid protein                                                                   | 5.59                       |
| 14580   | Gfap        | glial fibrillary acidic protein                                                                     | 5.17                       |
| 58807   | Slco1c1     | solute carrier organic anion transporter family, member 1c1                                         | 5.04                       |
| 11749   | Anxa6       | annexin A6                                                                                          | 4.86                       |
| 18768   | Pkib        | protein kinase inhibitor beta, cAMP dependent, testis specific                                      | 4.70                       |
| 67784   | Plxnd1      | plexin D1                                                                                           | 4.62                       |
| 14580   | Gfap        | glial fibrillary acidic protein                                                                     | 4.56                       |
| 13837   | Epha3       | Eph receptor A3                                                                                     | 4.54                       |
| 237761  | Ankrd43     | ankyrin repeat domain 43                                                                            | 4.44                       |
| 57811   | Rgr         | retinal G protein coupled receptor                                                                  | 4.19                       |
| 14633   | Gli2        | GLI-Kruppel family member GLI2                                                                      | 4.08                       |
| 13593   | Ebf3        | early B-cell factor 3                                                                               | 4.05                       |
| 22417   | Wnt4        | wingless-related MMTV integration site 4                                                            | 4.04                       |
| 19734   | Rgs16       | regulator of G-protein signaling 16                                                                 | 4.04                       |
| 27984   | Efhd2       | EF hand domain containing 2                                                                         | 4.03                       |
| 13642   | Efnb2       | ephrin B2                                                                                           | 3.96                       |
| 18073   | Nid1        | nidogen 1                                                                                           | 3.90                       |
| 20198   | S100a4      | S100 calcium binding protein A4                                                                     | 3.80                       |
| 18159   | Nppc        | natriuretic peptide precursor type C                                                                | 3.79                       |
| 19734   | Rgs16       | regulator of G-protein signaling 16                                                                 | 3.78                       |
| 70839   | P2ry12      | purinergic receptor P2Y, G-protein coupled 12                                                       | 3.78                       |
| 140723  | Cacng5      | calcium channel, voltage-dependent, gamma subunit 5                                                 | 3.77                       |
| 75646   | Rai14       | retinoic acid induced 14                                                                            | 3.75                       |
| 240753  | Plekha6     | pleckstrin homology domain containing, family A member 6                                            | 3.74                       |
| 53901   | Dscr111     | Down syndrome critical region gene 1-like 1 transmembrane and tetratricopeptide repeat containing 4 | 3.72                       |
| 70551   | Tmtc4       |                                                                                                     | 3.70                       |
| 114249  | Npnt        | nephronectin                                                                                        | 3.64                       |
| 18575   | Pde1c       | phosphodiesterase 1C                                                                                | 3.63                       |
| 13837   | Epha3       | Eph receptor A3                                                                                     | 3.63                       |
| 19736   | Rgs4        | regulator of G-protein signaling 4                                                                  | 3.58                       |
| 212712  | Satb2       | special AT-rich sequence binding protein 2                                                          | 3.53                       |
| 114249  | Npnt        | nephronectin                                                                                        | 3.46                       |
| 58208   | Bcl11b      | B-cell leukemia/lymphoma 11B                                                                        | 3.45                       |
| 66222   | Serpinb1a   | serine (or cysteine) peptidase inhibitor, clade B, member 1a                                        | 3.40                       |

|        |               |                                                                           |      |
|--------|---------------|---------------------------------------------------------------------------|------|
| 74318  | Hod           | homeobox only domain                                                      | 3.40 |
| 21813  | Tgfb2         | transforming growth factor, beta receptor II                              | 3.39 |
| 15904  | Id4           | inhibitor of DNA binding 4                                                | 3.37 |
| 12411  | Cbs           | cystathionine beta-synthase                                               | 3.35 |
| 16574  | Kif5c         | kinesin family member 5C                                                  | 3.33 |
| 89867  | Lztr2         | leucine zipper transcription regulator 2                                  | 3.30 |
| 18798  | Plcb4         | phospholipase C, beta 4                                                   | 3.29 |
| 22045  | Trhr          | thyrotropin releasing hormone receptor                                    | 3.29 |
| 15904  | Id4           | inhibitor of DNA binding 4                                                | 3.26 |
| 15904  | Id4           | inhibitor of DNA binding 4                                                | 3.26 |
| 74147  | Ehhadh        | enoyl-Coenzyme A, hydratase/3-hydroxyacyl Coenzyme A dehydrogenase        | 3.26 |
| 20443  | St3gal4       | ST3 beta-galactoside alpha-2,3-sialyltransferase 4                        | 3.24 |
| 67082  | 1700011H14Rik | RIKEN cDNA 1700011H14 gene                                                | 3.20 |
| 171170 | Mbnl3         | muscleblind-like 3 (Drosophila)                                           | 3.19 |
| 320078 | Olfml2b       | olfactomedin-like 2B                                                      | 3.15 |
| 80890  | Trim2         | tripartite motif protein 2                                                | 3.15 |
| 233328 | Lrrk1         | leucine-rich repeat kinase 1                                              | 3.13 |
| 56353  | Rybp          | RING1 and YY1 binding protein                                             | 3.13 |
| 53625  | B3gnt2        | UDP-GlcNAc:betaGal beta-1,3-N-acetylglucosaminyltransferase 2             | 3.12 |
| 72704  | 2810051F02Rik | RIKEN cDNA 2810051F02 gene                                                | 3.12 |
| 19771  | Rlbp1         | retinaldehyde binding protein 1                                           | 3.11 |
| 15874  | Iapp          | islet amyloid polypeptide                                                 | 3.11 |
| 74318  | Hod           | homeobox only domain                                                      | 3.10 |
| 13602  | Sparc1        | SPARC-like 1 (mast9, hevin)                                               | 3.07 |
| 68939  | Rasl11b       | RAS-like, family 11, member B                                             | 3.03 |
| 80890  | Trim2         | tripartite motif protein 2                                                | 3.01 |
| 66066  | Gng11         | guanine nucleotide binding protein (G protein), gamma 11                  | 2.97 |
| 18768  | Pkib          | protein kinase inhibitor beta, cAMP dependent, testis specific            | 2.97 |
| 18018  | Nfatc1        | nuclear factor of activated T-cells, cytoplasmic, calcineurin-dependent 1 | 2.95 |
| 27403  | Abca7         | ATP-binding cassette, sub-family A (ABC1), member 7                       | 2.95 |
| 114249 | Npnt          | nephronectin                                                              | 2.93 |
| 20692  | Sparc         | secreted acidic cysteine rich glycoprotein                                | 2.92 |
| 66195  | 1110058A15Rik | RIKEN cDNA 1110058A15 gene                                                | 2.91 |
| 56878  | Rbms1         | RNA binding motif, single stranded interacting protein 1                  | 2.90 |
| 80890  | Trim2         | tripartite motif protein 2                                                | 2.86 |
| 246730 | Oas1a         | 2'-5' oligoadenylate synthetase 1A                                        | 2.86 |
| 80890  | Trim2         | tripartite motif protein 2                                                | 2.81 |
| 50876  | Tmod2         | tropomodulin 2                                                            | 2.81 |
| 100727 | Ugt2b34       | UDP glucuronosyltransferase 2 family, polypeptide B34                     | 2.78 |
| 15937  | Ier3          | immediate early response 3                                                | 2.77 |
| 71602  | Myo1e         | myosin IE                                                                 | 2.76 |
| 19223  | Ptgis         | prostaglandin I2 (prostacyclin) synthase                                  | 2.76 |
| 17380  | Mme           | membrane metallo endopeptidase                                            | 2.76 |

|        |               |                                                                         |      |
|--------|---------------|-------------------------------------------------------------------------|------|
| 67841  | Atg3          | autophagy-related 3 (yeast)                                             | 2.71 |
| 81897  | Tlr9          | toll-like receptor 9                                                    | 2.71 |
| 106906 | AI450241      | expressed sequence AI450241                                             | 2.71 |
| 234199 | Fgl1          | fibrinogen-like protein 1                                               | 2.71 |
| 74122  | Tmem43        | transmembrane protein 43                                                | 2.70 |
| 108116 | Slco3a1       | solute carrier organic anion transporter family, member 3a1             | 2.70 |
| 22139  | Ttr           | transthyretin                                                           | 2.69 |
| 16449  | Jag1          | jagged 1                                                                | 2.69 |
| 27971  | D8Wsu26e      | DNA segment, Chr 8, Wayne State University 26, expressed                | 2.68 |
| 13591  | Ebf1          | early B-cell factor 1                                                   | 2.67 |
| 17096  | Lyn           | Yamaguchi sarcoma viral (v-yes-1) oncogene homolog                      | 2.65 |
| 67483  | 1700028P14Rik | RIKEN cDNA 1700028P14 gene                                              | 2.65 |
| 19332  | Rab20         | RAB20, member RAS oncogene family                                       | 2.64 |
| 11749  | Anxa6         | annexin A6                                                              | 2.63 |
| 114249 | Npnt          | nephronectin                                                            | 2.62 |
| 22439  | Xkh           | Kell blood group precursor (McLeod phenotype) homolog                   | 2.62 |
| 209047 | Gipc3         | GIPC PDZ domain containing family, member 3                             | 2.61 |
| 12350  | Car3          | carbonic anhydrase 3                                                    | 2.60 |
| 26879  | B3galnt1      | UDP-GalNAc:betaGlcNAc beta 1,3-galactosaminyltransferase, polypeptide 1 | 2.58 |
| 15904  | Id4           | inhibitor of DNA binding 4                                              | 2.57 |
| 12350  | Car3          | carbonic anhydrase 3                                                    | 2.54 |
| 14595  | B4galt1       | UDP-Gal:betaGlcNAc beta 1,4-galactosyltransferase, polypeptide 1        | 2.54 |
| 12945  | Dmbt1         | deleted in malignant brain tumors 1                                     | 2.53 |
| 384009 | Glipr2        | GLI pathogenesis-related 2                                              | 2.53 |
| 12494  | Cd38          | CD38 antigen                                                            | 2.53 |
| 11568  | Aebp1         | AE binding protein 1                                                    | 2.52 |
| 20583  | Snai2         | snail homolog 2 (Drosophila)                                            | 2.51 |
| 15904  | Id4           | inhibitor of DNA binding 4                                              | 2.50 |
| 17960  | Nat1          | N-acetyltransferase 1 (arylamine N-acetyltransferase)                   | 2.48 |
| 17300  | Foxc1         | forkhead box C1                                                         | 2.47 |
| 19659  | Rbp1          | retinol binding protein 1, cellular                                     | 2.47 |
| 21922  | Clec3b        | C-type lectin domain family 3, member b                                 | 2.46 |
| 14633  | Gli2          | GLI-Kruppel family member GLI2                                          | 2.44 |
| 235587 | Parp3         | poly (ADP-ribose) polymerase family, member 3                           | 2.43 |
| 23936  | Lynx1         | Ly6/neurotoxin 1                                                        | 2.41 |
| 18584  | Pde8a         | phosphodiesterase 8A                                                    | 2.38 |
| 20336  | Exoc4         | exocyst complex component 4                                             | 2.37 |
| 14486  | Gcap8         | granule cell antiserum positive 8                                       | 2.37 |
| 193385 | 6330500D04Rik | RIKEN cDNA 6330500D04 gene                                              | 2.37 |
| 11898  | Ass1          | argininosuccinate synthetase 1                                          | 2.35 |
| 13592  | Ebf2          | early B-cell factor 2                                                   | 2.35 |
| 214855 | Arid5a        | AT rich interactive domain 5A (Mrf1 like)                               | 2.35 |
| 21813  | Tgfr2         | transforming growth factor, beta receptor II                            | 2.34 |
| 20473  | Six3          | sine oculis-related homeobox 3 homolog (Drosophila)                     | 2.34 |

|        |               |                                                                               |      |
|--------|---------------|-------------------------------------------------------------------------------|------|
| 30805  | Slc22a4       | solute carrier family 22 (organic cation transporter), member 4               | 2.33 |
| 23934  | Ly6h          | lymphocyte antigen 6 complex, locus H                                         | 2.31 |
| 17096  | Lyn           | Yamaguchi sarcoma viral (v-yes-1) oncogene homolog                            | 2.30 |
| 11601  | Angpt2        | angiopoietin 2                                                                | 2.30 |
| 12411  | Cbs           | cystathionine beta-synthase                                                   | 2.29 |
| 21835  | Thrsp         | thyroid hormone responsive SPOT14 homolog (Rattus)                            | 2.29 |
| 11906  | Atbf1         | AT motif binding factor 1                                                     | 2.27 |
| 14696  | Gnb4          | guanine nucleotide binding protein, beta 4                                    | 2.26 |
| 105859 | Csdc2         | cold shock domain containing C2, RNA binding                                  | 2.25 |
| 14696  | Gnb4          | guanine nucleotide binding protein, beta 4                                    | 2.25 |
| 18073  | Nid1          | nidogen 1                                                                     | 2.22 |
| 19288  | Ptx3          | pentraxin related gene                                                        | 2.22 |
| 56878  | Rbms1         | RNA binding motif, single stranded interacting protein 1                      | 2.22 |
| 68337  | Crip2         | cysteine rich protein 2                                                       | 2.21 |
| 12522  | Cd83          | CD83 antigen                                                                  | 2.21 |
| 14395  | Gabra2        | gamma-aminobutyric acid (GABA-A) receptor, subunit alpha 2                    | 2.20 |
| 104001 | Rtn1          | reticulon 1                                                                   | 2.20 |
| 21835  | Thrsp         | thyroid hormone responsive SPOT14 homolog (Rattus)                            | 2.20 |
| 12841  | Col9a3        | procollagen, type IX, alpha 3                                                 | 2.20 |
| 21923  | Tnc           | tenascin C                                                                    | 2.20 |
| 67198  | 2810022L02Rik | RIKEN cDNA 2810022L02 gene                                                    | 2.19 |
| 12585  | Cdr2          | cerebellar degeneration-related 2                                             | 2.17 |
| 319146 | Ifnz          | interferon zeta                                                               | 2.17 |
| 14681  | Gnao1         | guanine nucleotide binding protein, alpha o                                   | 2.15 |
| 269608 | Plekhg5       | pleckstrin homology domain containing, family G (with RhoGef domain) member 5 | 2.15 |
| 231238 | 2310045A20Rik | RIKEN cDNA 2310045A20 gene                                                    | 2.14 |
| 20450  | St8sia2       | ST8 alpha-N-acetyl-neuraminide alpha-2,8-sialyltransferase 2                  | 2.14 |
| 70202  | 2310051M13Rik | RIKEN cDNA 2310051M13 gene                                                    | 2.14 |
| 18081  | Ninj1         | ninjurin 1                                                                    | 2.14 |
| 20969  | Sdc1          | syndecan 1                                                                    | 2.13 |
| 13593  | Ebf3          | early B-cell factor 3                                                         | 2.13 |
| 21857  | Timp1         | tissue inhibitor of metalloproteinase 1                                       | 2.12 |
| 71914  | Antxr2        | anthrax toxin receptor 2                                                      | 2.11 |
| 67111  | Asahl         | N-acylsphingosine amidohydrolase (acid ceramidase)-like                       | 2.10 |
| 14457  | Gas7          | growth arrest specific 7                                                      | 2.10 |
| 11648  | Akp3          | alkaline phosphatase 3, intestine, not Mn requiring                           | 2.09 |
| 80837  | Rhoj          | ras homolog gene family, member J                                             | 2.09 |
| 13593  | Ebf3          | early B-cell factor 3                                                         | 2.08 |
| 53625  | B3gnt2        | UDP-GlcNAc:betaGal beta-1,3-N-acetylglucosaminyltransferase 2                 | 2.08 |
| 22761  | Zfpm1         | zinc finger protein, multitype 1                                              | 2.06 |
| 227612 | A830007P12Rik | RIKEN cDNA A830007P12 gene                                                    | 2.06 |

|        |          |                                                                  |      |
|--------|----------|------------------------------------------------------------------|------|
| 14371  | Fzd9     | frizzled homolog 9 (Drosophila)                                  | 2.06 |
| 14715  | Gnrhr    | gonadotropin releasing hormone receptor                          | 2.06 |
| 13844  | Ephb2    | Eph receptor B2                                                  | 2.06 |
| 14960  | H2-Aa    | histocompatibility 2, class II antigen A, alpha                  | 2.06 |
| 18830  | Pltp     | phospholipid transfer protein                                    | 2.06 |
| 12469  | Cct8     | chaperonin subunit 8 (theta)                                     | 2.04 |
| 12038  | Bche     | butyrylcholinesterase                                            | 2.03 |
| 214944 | Mobk12b  | MOB1, Mps One Binder kinase activator-like 2B (yeast)            | 2.02 |
| 16949  | Loxl1    | lysyl oxidase-like 1                                             | 2.02 |
| 227580 | C1q13    | C1q-like 3                                                       | 2.02 |
| 21391  | Tbxas1   | thromboxane A synthase 1, platelet                               | 2.01 |
| 69097  | Trim15   | tripartite motif protein 15                                      | 2.01 |
| 170677 | Pcdh21   | protocadherin 21                                                 | 2.01 |
| 208177 | Phldb2   | pleckstrin homology-like domain, family B, member 2              | 2.01 |
| 22413  | Wnt2     | wingless-related MMTV integration site 2                         | 2.00 |
| 242653 | Cldn19   | claudin 19                                                       | 2.00 |
| 320982 | Arl4c    | ADP-ribosylation factor-like 4C                                  | 1.99 |
| 70551  | Tmtc4    | transmembrane and tetratricopeptide repeat containing 4          | 1.98 |
| 64085  | Clstn2   | calsyntenin 2                                                    | 1.97 |
| 85030  | Tnfrsf25 | tumor necrosis factor receptor superfamily, member 25            | 1.96 |
| 14314  | Fstl1    | follistatin-like 1                                               | 1.95 |
| 170571 | Cntnap4  | contactin associated protein 4                                   | 1.95 |
| 12825  | Col3a1   | procollagen, type III, alpha 1                                   | 1.93 |
| 18029  | Nfic     | nuclear factor I/C                                               | 1.93 |
| 14264  | Fmod     | fibromodulin                                                     | 1.93 |
| 56847  | Aldh1a3  | aldehyde dehydrogenase family 1, subfamily A3                    | 1.92 |
| 13650  | Rhbf1    | rhomboid family 1 (Drosophila)                                   | 1.90 |
| 16660  | Krt1-1   | keratin complex 1, acidic, gene 1                                | 1.90 |
| 11568  | Aebp1    | AE binding protein 1                                             | 1.89 |
| 227541 | Camk1d   | calcium/calmodulin-dependent protein kinase ID                   | 1.88 |
| 240442 | BC024969 | cDNA sequence BC024969                                           | 1.88 |
| 16574  | Kif5c    | kinesin family member 5C                                         | 1.88 |
| 14456  | Gas6     | growth arrest specific 6                                         | 1.87 |
| 11749  | Anxa6    | annexin A6                                                       | 1.87 |
| 27027  | Tspan32  | tetraspanin 32                                                   | 1.87 |
| 11676  | Aldoc    | aldolase 3, C isoform                                            | 1.85 |
| 270192 | Rab6b    | RAB6B, member RAS oncogene family                                | 1.85 |
| 228357 | Lrp4     | low density lipoprotein receptor-related protein 4               | 1.84 |
| 14164  | Fgf1     | fibroblast growth factor 1                                       | 1.83 |
| 16004  | Igf2r    | insulin-like growth factor 2 receptor                            | 1.81 |
| 22045  | Trhr     | thyrotropin releasing hormone receptor                           | 1.81 |
| 99543  | Olfml3   | olfactomedin-like 3                                              | 1.80 |
| 26878  | B3galt2  | UDP-Gal:betaGlcNAc beta 1,3-galactosyltransferase, polypeptide 2 | 1.80 |
| 246228 | Vwa1     | von Willebrand factor A domain containing 1                      | 1.80 |
| 212307 | Mapre2   | microtubule-associated protein, RP/EB family, member 2           | 1.80 |
| 14204  | Il4i1    | interleukin 4 induced 1                                          | 1.78 |
| 12494  | Cd38     | CD38 antigen                                                     | 1.78 |
| 69852  | Tcf23    | transcription factor 23                                          | 1.78 |

|        |               |                                                                                             |      |
|--------|---------------|---------------------------------------------------------------------------------------------|------|
| 13642  | Efnb2         | ephrin B2                                                                                   | 1.78 |
| 235041 | Ankrd25       | ankyrin repeat domain 25                                                                    | 1.76 |
| 14264  | Fmod          | fibromodulin                                                                                | 1.76 |
| 108013 | Brunol4       | bruno-like 4, RNA binding protein (Drosophila)                                              | 1.76 |
| 211652 | Wwc1          | WW, C2 and coiled-coil domain containing 1                                                  | 1.75 |
| 12728  | Clcn5         | chloride channel 5                                                                          | 1.75 |
| 20362  | Sept8         | septin 8                                                                                    | 1.75 |
| 26377  | Dapp1         | dual adaptor for phosphotyrosine and 3-phosphoinositides 1                                  | 1.74 |
| 15572  | Elavl4        | ELAV (embryonic lethal, abnormal vision, Drosophila)-like 4 (Hu antigen D)                  | 1.74 |
| 16004  | Igf2r         | insulin-like growth factor 2 receptor                                                       | 1.74 |
| 75646  | Rai14         | retinoic acid induced 14                                                                    | 1.73 |
| 12587  | Mia1          | melanoma inhibitory activity 1                                                              | 1.73 |
| 12484  | Cd24a         | CD24a antigen                                                                               | 1.70 |
| 66890  | Lman2         | lectin, mannose-binding 2                                                                   | 1.70 |
| 18164  | Nptx1         | neuronal pentraxin 1                                                                        | 1.69 |
| 18786  | Plaa          | phospholipase A2, activating protein                                                        | 1.69 |
| 101202 | AI987662      | expressed sequence AI987662                                                                 | 1.68 |
| 107747 | Aldh11l       | aldehyde dehydrogenase 1 family, member L1                                                  | 1.68 |
| 56508  | Rapgef4       | Rap guanine nucleotide exchange factor (GEF) 4                                              | 1.68 |
| 52392  | D1Ert622e     | DNA segment, Chr 1, ERATO Doi 622, expressed                                                | 1.68 |
| 170768 | Pfkfb3        | 6-phosphofructo-2-kinase/fructose-2,6-biphosphatase 3                                       | 1.68 |
| 12832  | Col5a2        | procollagen, type V, alpha 2                                                                | 1.67 |
| 14164  | Fgf1          | fibroblast growth factor 1                                                                  | 1.67 |
| 15209  | Hesx1         | homeo box gene expressed in ES cells                                                        | 1.67 |
| 11636  | Ak1           | adenylate kinase 1                                                                          | 1.65 |
| 214444 | Cdk5rap2      | CDK5 regulatory subunit associated protein 2                                                | 1.65 |
| 216164 | Dos           | downstream of Stk11                                                                         | 1.65 |
| 214663 | Slc25a29      | solute carrier family 25 (mitochondrial carrier, palmitoylcarnitine transporter), member 29 | 1.65 |
| 56632  | Sphk2         | sphingosine kinase 2                                                                        | 1.65 |
| 17150  | Mfap2         | microfibrillar-associated protein 2                                                         | 1.64 |
| 19126  | Prom1         | prominin 1                                                                                  | 1.64 |
| 20969  | Sdc1          | syndecan 1                                                                                  | 1.63 |
| 227541 | Camk1d        | calcium/calmodulin-dependent protein kinase ID                                              | 1.61 |
| 66141  | Ifitm3        | interferon induced transmembrane protein 3                                                  | 1.60 |
| 19206  | Ptch1         | patched homolog 1                                                                           | 1.60 |
| 20204  | Prrx2         | paired related homeobox 2                                                                   | 1.59 |
| 75415  | Arhgap12      | Rho GTPase activating protein 12                                                            | 1.59 |
| 18164  | Nptx1         | neuronal pentraxin 1                                                                        | 1.59 |
| 12007  | Azgp1         | alpha-2-glycoprotein 1, zinc                                                                | 1.58 |
| 56741  | Nope          | neighbor of Punc E11                                                                        | 1.58 |
| 15572  | Elavl4        | ELAV (embryonic lethal, abnormal vision, Drosophila)-like 4 (Hu antigen D)                  | 1.57 |
| 76413  | 1700016D06Rik | RIKEN cDNA 1700016D06 gene                                                                  | 1.57 |
| 11479  | Acvr1b        | activin A receptor, type 1B                                                                 | 1.57 |
| 17387  | Mmp14         | matrix metalloproteinase 14 (membrane-inserted)                                             | 1.57 |

|        |               |                                                                                             |      |
|--------|---------------|---------------------------------------------------------------------------------------------|------|
| 18366  | Olf65         | olfactory receptor 64                                                                       | 1.57 |
| 29815  | Bcar3         | breast cancer anti-estrogen resistance 3                                                    | 1.56 |
| 109135 | Plekha5       | pleckstrin homology domain containing, family A member 5                                    | 1.55 |
| 16172  | Il17ra        | interleukin 17 receptor A                                                                   | 1.55 |
| 18481  | Pak3          | p21 (CDKN1A)-activated kinase 3                                                             | 1.54 |
| 56744  | Cxcl4         | chemokine (C-X-C motif) ligand 4                                                            | 1.53 |
| 192657 | Elf2          | elongation factor RNA polymerase II 2                                                       | 1.53 |
| 216835 | Usp43         | ubiquitin specific peptidase 43                                                             | 1.52 |
| 69953  | 2810025M15Rik | RIKEN cDNA 2810025M15 gene                                                                  | 1.52 |
| 22158  | Tulp3         | tubby-like protein 3                                                                        | 1.52 |
| 56508  | Rapgef4       | Rap guanine nucleotide exchange factor (GEF) 4                                              | 1.52 |
| 16402  | Itga5         | integrin alpha 5 (fibronectin receptor alpha)                                               | 1.51 |
| 68178  | Cgnl1         | cingulin-like 1                                                                             | 1.51 |
| 17300  | Foxc1         | forkhead box C1                                                                             | 1.51 |
| 14451  | Gas1          | growth arrest specific 1                                                                    | 1.51 |
| 12832  | Col5a2        | procollagen, type V, alpha 2                                                                | 1.51 |
| 14451  | Gas1          | growth arrest specific 1                                                                    | 1.50 |
| 217893 | Pacs2         | phosphofurin acidic cluster sorting protein 2                                               | 1.49 |
| 14221  | Fjx1          | four jointed box 1 (Drosophila)                                                             | 1.49 |
| 18014  | Neurog1       | neurogenin 1                                                                                | 1.48 |
| 18830  | Pltp          | phospholipid transfer protein                                                               | 1.46 |
| 60510  | Syt9          | synaptotagmin IX                                                                            | 1.46 |
| 11936  | Fxyd2         | FXDY domain-containing ion transport regulator 2                                            | 1.46 |
| 234582 | Ccdc102a      | coiled-coil domain containing 102A                                                          | 1.45 |
| 11682  | Alk           | anaplastic lymphoma kinase                                                                  | 1.45 |
| 52392  | D1Ertd622e    | DNA segment, Chr 1, ERATO Doi 622, expressed                                                | 1.45 |
| 12738  | Cldn2         | claudin 2                                                                                   | 1.44 |
| 13983  | Esr2          | estrogen receptor 2 (beta)                                                                  | 1.44 |
| 110911 | Cds2          | CDP-diacylglycerol synthase (phosphatidate cytidyltransferase) 2                            | 1.44 |
| 29806  | Limd1         | LIM domains containing 1                                                                    | 1.44 |
| 52331  | D5Ertd593e    | DNA segment, Chr 5, ERATO Doi 593, expressed                                                | 1.43 |
| 63959  | Slc29a1       | solute carrier family 29 (nucleoside transporters), member 1                                | 1.43 |
| 56741  | Nope          | neighbor of Punc E11                                                                        | 1.43 |
| 214663 | Slc25a29      | solute carrier family 25 (mitochondrial carrier, palmitoylcarnitine transporter), member 29 | 1.43 |
| 72174  | Atxn7l4       | ataxin 7-like 4                                                                             | 1.42 |
| 58804  | Cdc42ep5      | CDC42 effector protein (Rho GTPase binding) 5                                               | 1.41 |
| 103213 | Traf3ip2      | Traf3 interacting protein 2                                                                 | 1.41 |
| 68861  | 1190002N15Rik | RIKEN cDNA 1190002N15 gene                                                                  | 1.40 |
| 97095  | C81521        | expressed sequence C81521                                                                   | 1.40 |
| 20346  | Sema3a        | sema domain, immunoglobulin domain (Ig), short basic domain, secreted, (semaphorin) 3A      | 1.40 |
| 17532  | Mras          | muscle and microspikes RAS                                                                  | 1.39 |
| 243362 | Stard13       | serologically defined colon cancer antigen 13                                               | 1.39 |

|        |               |                                                                                           |      |
|--------|---------------|-------------------------------------------------------------------------------------------|------|
| 26987  | Eif4e2        | eukaryotic translation initiation factor 4E member 2                                      | 1.39 |
| 67880  | Dcxr          | dicarbonyl L-xylulose reductase                                                           | 1.39 |
| 215512 | 5730593F17Rik | RIKEN cDNA 5730593F17 gene                                                                | 1.39 |
| 69696  | 2310057N15Rik | RIKEN cDNA 2310057N15 gene                                                                | 1.38 |
| 66193  | 1110049F12Rik | RIKEN cDNA 1110049F12 gene                                                                | 1.38 |
| 14114  | Fbln1         | fibulin 1                                                                                 | 1.38 |
| 12484  | Cd24a         | CD24a antigen                                                                             | 1.38 |
| 330662 | Dock1         | dedicator of cyto-kinesis 1                                                               | 1.37 |
| 18481  | Pak3          | p21 (CDKN1A)-activated kinase 3                                                           | 1.37 |
| 214968 | Sema6d        | sema domain, transmembrane domain (TM), and cytoplasmic domain, (semaphorin) 6D           | 1.36 |
| 83395  | Sp6           | trans-acting transcription factor 6                                                       | 1.36 |
| 21677  | Tead2         | TEA domain family member 2                                                                | 1.36 |
| 75273  | Pelp1         | proline, glutamic acid and leucine rich protein 1                                         | 1.35 |
| 11878  | Arx           | aristaless related homeobox gene (Drosophila)                                             | 1.35 |
| 229474 | 6330505N24Rik | RIKEN cDNA 6330505N24 gene                                                                | 1.35 |
| 12561  | Cdh4          | cadherin 4                                                                                | 1.33 |
| 217684 | 4933426M11Rik | RIKEN cDNA 4933426M11 gene                                                                | 1.33 |
| 20362  | Sept8         | septin 8                                                                                  | 1.33 |
| 12476  | Cd151         | CD151 antigen                                                                             | 1.33 |
| 29806  | Limd1         | LIM domains containing 1                                                                  | 1.33 |
| 12890  | Cplx2         | complexin 2                                                                               | 1.33 |
| 19094  | Mapk11        | mitogen-activated protein kinase 11                                                       | 1.32 |
| 20907  | Stx1a         | syntaxin 1A (brain)                                                                       | 1.32 |
| 16870  | Lhx2          | LIM homeobox protein 2                                                                    | 1.32 |
| 211652 | Wwc1          | WW, C2 and coiled-coil domain containing 1                                                | 1.32 |
| 12839  | Col9a1        | procollagen, type IX, alpha 1                                                             | 1.32 |
| 14645  | Glul          | glutamate-ammonia ligase (glutamine synthetase)                                           | 1.31 |
| 72077  | Gcnt3         | glucosaminyl (N-acetyl) transferase 3, mucin type                                         | 1.30 |
| 16391  | Isgf3g        | interferon dependent positive acting transcription factor 3 gamma                         | 1.30 |
| 140492 | Kcnn2         | potassium intermediate/small conductance calcium-activated channel, subfamily N, member 2 | 1.30 |
| 109624 | Cald1         | caldesmon 1                                                                               | 1.30 |
| 83814  | Nedd4l        | neural precursor cell expressed, developmentally down-regulated gene 4-like               | 1.30 |
| 16404  | Itga7         | integrin alpha 7                                                                          | 1.29 |
| 16564  | Kif21a        | kinesin family member 21A                                                                 | 1.28 |
| 80880  | Ankrd47       | ankyrin repeat domain 47                                                                  | 1.28 |
| 23920  | Insrr         | insulin receptor-related receptor                                                         | 1.28 |
| 80880  | Ankrd47       | ankyrin repeat domain 47                                                                  | 1.28 |
| 16882  | Lig3          | ligase III, DNA, ATP-dependent                                                            | 1.28 |
| 68581  | Tmed10        | transmembrane emp24-like trafficking protein 10 (yeast)                                   | 1.27 |
| 97294  | C79468        | expressed sequence C79468                                                                 | 1.27 |
| 242687 | Wasf2         | WAS protein family, member 2                                                              | 1.27 |
| 17121  | Mxd3          | Max dimerization protein 3                                                                | 1.27 |



|        |               |                                                                       |      |
|--------|---------------|-----------------------------------------------------------------------|------|
| 26417  | Mapk3         | mitogen activated protein kinase 3                                    | 1.27 |
| 19130  | Prox1         | prospero-related homeobox 1                                           | 1.27 |
| 211770 | Trib1         | tribbles homolog 1 (Drosophila)                                       | 1.27 |
| 21974  | Top2b         | topoisomerase (DNA) II beta                                           | 1.26 |
| 14645  | Glul          | glutamate-ammonia ligase (glutamine synthetase)                       | 1.26 |
| 73173  | Pcdh18        | protocadherin 18                                                      | 1.25 |
| 208104 | Mlxip         | MLX interacting protein                                               | 1.25 |
| 16071  | Igk-C         | immunoglobulin kappa chain, constant region                           | 1.25 |
| 22003  | Tpm1          | tropomyosin 1, alpha                                                  | 1.23 |
| 241308 | Ralgps1       | Ral GEF with PH domain and SH3 binding motif 1                        | 1.22 |
| 68861  | 1190002N15Rik | RIKEN cDNA 1190002N15 gene                                            | 1.22 |
| 19266  | Ptprd         | protein tyrosine phosphatase, receptor type, D                        | 1.22 |
| 65970  | Lima1         | LIM domain and actin binding 1                                        | 1.21 |
| 57370  | B4galt3       | UDP-Gal:betaGlcNAc beta 1,4-galactosyltransferase, polypeptide 3      | 1.21 |
| 20365  | Serf1         | small EDRK-rich factor 1                                              | 1.21 |
| 14291  | Fpr-rs4       | formyl peptide receptor, related sequence 4                           | 1.20 |
| 54409  | Ramp2         | receptor (calcitonin) activity modifying protein 2                    | 1.20 |
| 18015  | Nf1           | neurofibromatosis 1                                                   | 1.20 |
| 14615  | Gja7          | gap junction membrane channel protein alpha 7                         | 1.20 |
| 223753 | Cerk          | ceramide kinase                                                       | 1.19 |
| 64213  | St7           | Suppression of tumorigenicity 7                                       | 1.19 |
| 12484  | Cd24a         | CD24a antigen                                                         | 1.19 |
| 14314  | Fstl1         | follistatin-like 1                                                    | 1.19 |
| 16061  | Igh-VJ558     | immunoglobulin heavy chain (J558 family)                              | 1.18 |
| 107869 | Cth           | cystathionase (cystathionine gamma-lyase)                             | 1.18 |
| 22373  | Wap           | whey acidic protein                                                   | 1.18 |
| 14183  | Fgfr2         | fibroblast growth factor receptor 2                                   | 1.17 |
| 109624 | Cald1         | caldesmon 1                                                           | 1.17 |
| 71228  | Dlg5          | discs, large homolog 5 (Drosophila)                                   | 1.16 |
| 387524 | Znrf2         | zinc and ring finger 2                                                | 1.16 |
| 67525  | Trim62        | tripartite motif-containing 62                                        | 1.16 |
| 209039 | Tenc1         | tensin like C1 domain-containing phosphatase                          | 1.16 |
| 110391 | Qdpr          | quinoid dihydropteridine reductase                                    | 1.15 |
| 109624 | Cald1         | caldesmon 1                                                           | 1.15 |
| 29857  | Mapk12        | mitogen-activated protein kinase 12                                   | 1.15 |
| 20167  | Rtn2          | reticulon 2 (Z-band associated protein)                               | 1.14 |
| 66860  | Tanc1         | tetratricopeptide repeat, ankyrin repeat and coiled-coil containing 1 | 1.14 |
| 235431 | Coro2b        | coronin, actin binding protein, 2B                                    | 1.14 |
| 19222  | Ptgir         | prostaglandin I receptor (IP)                                         | 1.14 |
| 73173  | Pcdh18        | protocadherin 18                                                      | 1.13 |
| 114606 | Tle6          | transducin-like enhancer of split 6, homolog of Drosophila E(spl)     | 1.13 |
| 235587 | Parp3         | poly (ADP-ribose) polymerase family, member 3                         | 1.13 |
| 65970  | Lima1         | LIM domain and actin binding 1                                        | 1.13 |
| 18628  | Per3          | period homolog 3 (Drosophila)                                         | 1.13 |
| 22213  | Ube2g2        | ubiquitin-conjugating enzyme E2G 2                                    | 1.13 |
| 216543 | Cep68         | centrosomal protein 68                                                | 1.13 |

|        |               |                                                                                        |      |
|--------|---------------|----------------------------------------------------------------------------------------|------|
| 11820  | App           | amyloid beta (A4) precursor protein                                                    | 1.12 |
| 20620  | Plk2          | polo-like kinase 2 (Drosophila)                                                        | 1.12 |
| 21886  | Tle2          | transducin-like enhancer of split 2, homolog of Drosophila E(spl)                      | 1.12 |
| 70747  | Tspan2        | tetraspanin 2                                                                          | 1.11 |
| 93686  | Rbm9          | RNA binding motif protein 9                                                            | 1.11 |
| 18081  | Ninj1         | ninjurin 1                                                                             | 1.11 |
| 225655 | BC019561      | cDNA sequence BC019561                                                                 | 1.11 |
| 67951  | Tubb6         | tubulin, beta 6                                                                        | 1.11 |
| 76954  | St5           | suppression of tumorigenicity 5                                                        | 1.10 |
| 50523  | Lats2         | large tumor suppressor 2                                                               | 1.10 |
| 78896  | 1500015O10Rik | RIKEN cDNA 1500015O10 gene                                                             | 1.10 |
| 20975  | Synj2         | synaptojanin 2                                                                         | 1.10 |
| 15572  | Elavl4        | ELAV (embryonic lethal, abnormal vision, Drosophila)-like 4 (Hu antigen D)             | 1.10 |
| 20474  | Six4          | sine oculis-related homeobox 4 homolog (Drosophila)                                    | 1.09 |
| 244668 | Sipa1l2       | signal-induced proliferation-associated 1 like 2                                       | 1.08 |
| 20379  | Sfrp4         | secreted frizzled-related sequence protein 4                                           | 1.08 |
| 19214  | Ptgdr         | prostaglandin D receptor                                                               | 1.08 |
| 14183  | Fgfr2         | fibroblast growth factor receptor 2                                                    | 1.07 |
| 19042  | Ppm1a         | protein phosphatase 1A, magnesium dependent, alpha isoform                             | 1.07 |
| 18845  | Plexna2       | plexin A2                                                                              | 1.07 |
| 56874  | Rnf32         | ring finger protein 32                                                                 | 1.07 |
| 57295  | Icmt          | isoprenylcysteine carboxyl methyltransferase                                           | 1.07 |
| 20454  | St3gal5       | ST3 beta-galactoside alpha-2,3-sialyltransferase 5                                     | 1.07 |
| 18034  | Nfkb2         | nuclear factor of kappa light polypeptide gene enhancer in B-cells 2, p49/p100         | 1.06 |
| 20502  | Slc16a2       | solute carrier family 16 (monocarboxylic acid transporters), member 2                  | 1.06 |
| 16622  | Klk1b5        | kallikrein 1-related peptidase b5                                                      | 1.06 |
| 224014 | Fgd4          | FYVE, RhoGEF and PH domain containing 4                                                | 1.06 |
| 11676  | Aldoc         | aldolase 3, C isoform                                                                  | 1.05 |
| 29875  | Iqgap1        | IQ motif containing GTPase activating protein 1                                        | 1.05 |
| 19266  | Ptprd         | protein tyrosine phosphatase, receptor type, D                                         | 1.05 |
| 55985  | Cxcl13        | chemokine (C-X-C motif) ligand 13                                                      | 1.04 |
| 17121  | Mxd3          | Max dimerization protein 3                                                             | 1.04 |
| 63986  | Gmfg          | glia maturation factor, gamma                                                          | 1.04 |
| 23808  | Ash2l         | ash2 (absent, small, or homeotic)-like (Drosophila)                                    | 1.04 |
| 110911 | Cds2          | CDP-diacylglycerol synthase (phosphatidate cytidyltransferase) 2                       | 1.04 |
| 54635  | Pdgfc         | platelet-derived growth factor, C polypeptide                                          | 1.04 |
| 26970  | Pla2g2e       | phospholipase A2, group IIE                                                            | 1.04 |
| 20346  | Sema3a        | sema domain, immunoglobulin domain (Ig), short basic domain, secreted, (semaphorin) 3A | 1.03 |
| 227580 | C1ql3         | C1q-like 3                                                                             | 1.03 |
| 338351 | B230333C21Rik | RIKEN cDNA B230333C21 gene                                                             | 1.03 |
| 20969  | Sdc1          | syndecan 1                                                                             | 1.03 |
| 72121  | Dennd2d       | DENN/MADD domain containing 2D                                                         | 1.03 |

|        |               |                                                                                         |      |
|--------|---------------|-----------------------------------------------------------------------------------------|------|
| 50793  | Orc3l         | origin recognition complex, subunit 3-like ( <i>S. cerevisiae</i> )                     | 1.02 |
| 14349  | Fv1           | Friend virus susceptibility 1                                                           | 1.02 |
| 65964  | B230120H23Rik | RIKEN cDNA B230120H23 gene                                                              | 1.02 |
| 56405  | Dusp14        | dual specificity phosphatase 14                                                         | 1.02 |
| 17304  | Mfge8         | milk fat globule-EGF factor 8 protein                                                   | 1.02 |
| 68581  | Tmed10        | transmembrane emp24-like trafficking protein 10 (yeast)                                 | 1.00 |
| 19266  | Ptprd         | protein tyrosine phosphatase, receptor type, D                                          | 1.00 |
| 14415  | Gad1          | glutamic acid decarboxylase 1                                                           | 0.99 |
| 21823  | Th            | tyrosine hydroxylase                                                                    | 0.99 |
| 18027  | Nfia          | nuclear factor I/A                                                                      | 0.99 |
| 170753 | Zfp704        | zinc finger protein 704                                                                 | 0.98 |
| 56214  | Scamp4        | secretory carrier membrane protein 4                                                    | 0.98 |
| 100689 | Spon2         | spondin 2, extracellular matrix protein                                                 | 0.98 |
| 16599  | Klf3          | Kruppel-like factor 3 (basic)                                                           | 0.98 |
| 22350  | Vil2          | villin 2                                                                                | 0.97 |
| 140780 | Bmp2k         | BMP2 inducible kinase                                                                   | 0.97 |
| 223672 | BC020489      | cDNA sequence BC020489<br>NIMA (never in mitosis gene a)-related expressed              | 0.97 |
| 59126  | Nek6          | kinase 6                                                                                | 0.97 |
| 22352  | Vim           | vimentin                                                                                | 0.97 |
| 67151  | Psmid9        | proteasome (prosome, macropain) 26S subunit, non-ATPase, 9                              | 0.96 |
| 74134  | Cyp2s1        | cytochrome P450, family 2, subfamily s, polypeptide 1                                   | 0.96 |
| 22385  | Baz1b         | bromodomain adjacent to zinc finger domain, 1B                                          | 0.96 |
| 384817 | 4930448N21Rik | RIKEN cDNA 4930448N21 gene                                                              | 0.96 |
| 230157 | Tmeff1        | transmembrane protein with EGF-like and two follistatin-like domains 1                  | 0.95 |
| 65945  | Clstn1        | calsyntenin 1                                                                           | 0.95 |
| 246102 | Rttn          | rotatin                                                                                 | 0.95 |
| 19762  | Rit2          | Ras-like without CAAX 2                                                                 | 0.94 |
| 244216 | G630024C07Rik | RIKEN cDNA G630024C07 gene                                                              | 0.94 |
| 226090 | D19Wsu12e     | DNA segment, Chr 19, Wayne State University 12, expressed                               | 0.94 |
| 16000  | Igf1          | insulin-like growth factor 1                                                            | 0.94 |
| 13527  | Dtna          | dystrobrevin alpha                                                                      | 0.94 |
| 14415  | Gad1          | glutamic acid decarboxylase 1                                                           | 0.94 |
| 237336 | Tbpl1         | TATA box binding protein-like 1                                                         | 0.94 |
| 66457  | 2810002D19Rik | RIKEN cDNA 2810002D19 gene                                                              | 0.94 |
| 69745  | Pold4         | polymerase (DNA-directed), delta 4                                                      | 0.94 |
| 17984  | Ndn           | neccin                                                                                  | 0.93 |
| 50915  | Grb14         | growth factor receptor bound protein 14                                                 | 0.93 |
| 216134 | Pdxk          | pyridoxal (pyridoxine, vitamin B6) kinase                                               | 0.93 |
| 78255  | Ralgps2       | Ral GEF with PH domain and SH3 binding motif 2                                          | 0.93 |
| 68095  | Ociad1        | OCIA domain containing 1                                                                | 0.92 |
| 20350  | Sema3f        | sema domain, immunoglobulin domain (Ig), short basic domain, secreted, (semaphorin) 3 F | 0.92 |
| 29871  | Scmh1         | sex comb on midleg homolog 1                                                            | 0.91 |

|        |               |                                                                             |      |
|--------|---------------|-----------------------------------------------------------------------------|------|
| 68581  | Tmed10        | transmembrane emp24-like trafficking protein 10 (yeast)                     | 0.91 |
| 14009  | Etv1          | ets variant gene 1                                                          | 0.91 |
| 114249 | Npnt          | nephronectin                                                                | 0.91 |
| 69774  | Ms4a6b        | membrane-spanning 4-domains, subfamily A, member 6B                         | 0.91 |
| 234353 | 4931420C21Rik | RIKEN cDNA 4931420C21 gene                                                  | 0.91 |
| 18207  | Nthl1         | nth (endonuclease III)-like 1 (E.coli)                                      | 0.91 |
| 18294  | Ogg1          | 8-oxoguanine DNA-glycosylase 1                                              | 0.91 |
| 13131  | Dab1          | disabled homolog 1 (Drosophila)                                             | 0.90 |
| 66940  | Scotin        | scotin gene                                                                 | 0.90 |
| 223254 | Farp1         | FERM, RhoGEF (Arhgef) and pleckstrin domain protein 1 (chondrocyte-derived) | 0.90 |
| 59126  | Nek6          | NIMA (never in mitosis gene a)-related expressed kinase 6                   | 0.90 |
| 78248  | Armcx1        | armadillo repeat containing, X-linked 1                                     | 0.90 |
| 12724  | Clcn2         | chloride channel 2                                                          | 0.90 |
| 12492  | Scarb2        | scavenger receptor class B, member 2                                        | 0.90 |
| 67815  | Sec14l2       | SEC14-like 2 (S. cerevisiae)                                                | 0.90 |
| 12017  | Bag1          | Bcl2-associated athanogene 1                                                | 0.90 |
| 13076  | Cyp1a1        | cytochrome P450, family 1, subfamily a, polypeptide 1                       | 0.89 |
| 29875  | Iqgap1        | IQ motif containing GTPase activating protein 1                             | 0.89 |
| 11820  | App           | amyloid beta (A4) precursor protein                                         | 0.89 |
| 67803  | Limd2         | LIM domain containing 2                                                     | 0.89 |
| 18227  | Nr4a2         | nuclear receptor subfamily 4, group A, member 2                             | 0.89 |
| 70935  | Speer4f       | spermatogenesis associated glutamate (E)-rich protein 4f                    | 0.88 |
| 17967  | Ncam1         | neural cell adhesion molecule 1                                             | 0.88 |
| 66890  | Lman2         | lectin, mannose-binding 2                                                   | 0.88 |
| 13713  | Elk3          | ELK3, member of ETS oncogene family                                         | 0.88 |
| 66943  | Pqlc1         | PQ loop repeat containing 1                                                 | 0.88 |
| 19012  | Ppap2a        | phosphatidic acid phosphatase 2a                                            | 0.88 |
| 19012  | Ppap2a        | phosphatidic acid phosphatase 2a                                            | 0.87 |
| 225164 | Mib1          | mindbomb homolog 1 (Drosophila)                                             | 0.87 |
| 215114 | Hip1          | huntingtin interacting protein 1                                            | 0.87 |
| 52471  | D13Ertd37e    | DNA segment, Chr 13, ERATO Doi 37, expressed                                | 0.87 |
| 56693  | Crtap         | cartilage associated protein                                                | 0.87 |
| 21406  | Tcf12         | transcription factor 12                                                     | 0.87 |
| 14235  | Foxm1         | forkhead box M1                                                             | 0.86 |
| 66943  | Pqlc1         | PQ loop repeat containing 1                                                 | 0.86 |
| 13518  | Dst           | dystonin                                                                    | 0.86 |
| 70779  | Prdm5         | PR domain containing 5                                                      | 0.86 |
| 22323  | Vasp          | vasodilator-stimulated phosphoprotein                                       | 0.86 |
| 16522  | Kcnj6         | potassium inwardly-rectifying channel, subfamily J, member 6                | 0.85 |
| 192176 | Flna          | filamin, alpha                                                              | 0.85 |
| 18230  | Nxn           | nucleoredoxin                                                               | 0.85 |
| 330171 | Kctd10        | potassium channel tetramerisation domain containing 10                      | 0.85 |
| 13557  | E2f3          | E2F transcription factor 3                                                  | 0.85 |
| 56294  | Ptpn9         | protein tyrosine phosphatase, non-receptor type 9                           | 0.85 |

|        |               |                                                                                                                    |      |
|--------|---------------|--------------------------------------------------------------------------------------------------------------------|------|
| 107771 | Bmyc          | brain expressed myelocytomatosis oncogene                                                                          | 0.84 |
| 217038 | Mrm1          | mitochondrial rRNA methyltransferase 1 homolog ( <i>S. cerevisiae</i> )                                            | 0.84 |
| 23947  | Mid2          | midline 2                                                                                                          | 0.83 |
| 19714  | Rev3l         | REV3-like, catalytic subunit of DNA polymerase zeta<br>RAD54 like ( <i>S. cerevisiae</i> )                         | 0.83 |
| 232086 | Tmem150       | transmembrane protein 150                                                                                          | 0.83 |
| 14584  | Gfpt2         | glutamine fructose-6-phosphate transaminase 2                                                                      | 0.83 |
| 72055  | 1810073N04Rik | RIKEN cDNA 1810073N04 gene                                                                                         | 0.82 |
| 56470  | Rgs19         | regulator of G-protein signaling 19                                                                                | 0.82 |
| 23872  | Ets2          | E26 avian leukemia oncogene 2, 3' domain                                                                           | 0.82 |
| 12831  | Col5a1        | procollagen, type V, alpha 1                                                                                       | 0.82 |
| 68581  | Tmed10        | transmembrane emp24-like trafficking protein 10 (yeast)                                                            | 0.81 |
| 71412  | Dhrs2         | dehydrogenase/reductase member 2                                                                                   | 0.81 |
| 19248  | Ptpn12        | protein tyrosine phosphatase, non-receptor type 12<br>N-deacetylase/N-sulfotransferase (heparan<br>glucosaminyl) 1 | 0.81 |
| 15531  | Ndst1         | dopamine receptor 4                                                                                                | 0.80 |
| 13491  | Drd4          | double cortin and calcium/calmodulin-dependent protein<br>kinase-like 1                                            | 0.80 |
| 13175  | Dcamk1        | PHD finger protein 13                                                                                              | 0.80 |
| 230936 | Phf13         | disabled homolog 2 ( <i>Drosophila</i> ) interacting protein                                                       | 0.79 |
| 69601  | Dab2ip        | rabaptin, RAB GTPase binding effector protein 2                                                                    | 0.79 |
| 70314  | Rabep2        | coiled-coil domain containing 50                                                                                   | 0.79 |
| 67501  | Ccdc50        | zinc finger protein 704                                                                                            | 0.79 |
| 170753 | Zfp704        | quininoid dihydropteridine reductase                                                                               | 0.79 |
| 110391 | Qdpr          | cysteine-rich hydrophobic domain 1                                                                                 | 0.79 |
| 12212  | Chic1         | AT hook, DNA binding motif, containing 1                                                                           | 0.79 |
| 230793 | Ahdc1         | histocompatibility 13                                                                                              | 0.79 |
| 14950  | H13           | CD160 antigen                                                                                                      | 0.79 |
| 54215  | Cd160         | nudix (nucleoside diphosphate linked moiety X)-type<br>motif 6                                                     | 0.78 |
| 229228 | Nudt6         | a disintegrin and metallopeptidase domain 12 (meltrin<br>alpha)                                                    | 0.78 |
| 11489  | Adam12        | actinin alpha 4                                                                                                    | 0.78 |
| 60595  | Actn4         | paxillin                                                                                                           | 0.78 |
| 19303  | Pxn           | leucine-rich repeat-containing G protein-coupled<br>receptor 6                                                     | 0.78 |
| 329252 | Lgr6          | UDP-glucuronate decarboxylase 1                                                                                    | 0.78 |
| 67883  | Uxs1          | procollagen, type XI, alpha 1                                                                                      | 0.78 |
| 12814  | Col11a1       | cAMP responsive element modulator                                                                                  | 0.77 |
| 12916  | Crem          | DNA segment, Chr 16, Brigham & Women's Genetics<br>1543 expressed                                                  | 0.77 |
| 52910  | D16Bwg1543e   | Scm-like with four mbt domains 2                                                                                   | 0.77 |
| 353282 | Sfmbt2        | BTB (POZ) domain containing 3                                                                                      | 0.77 |
| 228662 | Btbd3         | golgi phosphoprotein 2                                                                                             | 0.77 |
| 105348 | Golph2        | achalasia, adrenocortical insufficiency, alacrimia                                                                 | 0.77 |
| 223921 | Aaas          | superoxide dismutase 3, extracellular                                                                              | 0.77 |
| 20657  | Sod3          | inositol 1,4,5-triphosphate receptor 1                                                                             | 0.77 |
| 16438  | Itpr1         | nuclear receptor co-repressor 2                                                                                    | 0.76 |
| 20602  | Ncor2         |                                                                                                                    |      |

|        |               |                                                                                                             |      |
|--------|---------------|-------------------------------------------------------------------------------------------------------------|------|
| 70082  | Lysmd2        | LysM, putative peptidoglycan-binding, domain containing 2                                                   | 0.76 |
| 12492  | Scarb2        | scavenger receptor class B, member 2                                                                        | 0.76 |
| 66646  | Rpe           | ribulose-5-phosphate-3-epimerase                                                                            | 0.76 |
| 18992  | Pou3f2        | POU domain, class 3, transcription factor 2                                                                 | 0.76 |
| 215114 | Hip1          | huntingtin interacting protein 1<br>src homology 2 domain-containing transforming protein                   | 0.76 |
| 20416  | Shc1          | C1                                                                                                          | 0.76 |
| 67501  | Ccdc50        | coiled-coil domain containing 50                                                                            | 0.76 |
| 69162  | Sec31I1       | SEC31-like 1 ( <i>S. cerevisiae</i> )                                                                       | 0.75 |
| 218763 | Lrrc3b        | leucine rich repeat containing 3B                                                                           | 0.75 |
| 12313  | Calm1         | calmodulin 1                                                                                                | 0.75 |
| 13030  | Ctsb          | cathepsin B                                                                                                 | 0.75 |
| 17967  | Ncam1         | neural cell adhesion molecule 1                                                                             | 0.75 |
| 11535  | Adm           | adrenomedullin                                                                                              | 0.75 |
| 107975 | Pacs1         | phosphofurin acidic cluster sorting protein 1                                                               | 0.75 |
| 78832  | 2700078E11Rik | RIKEN cDNA 2700078E11 gene                                                                                  | 0.75 |
| 15423  | Hoxc4         | homeo box C4                                                                                                | 0.74 |
| 12916  | Crem          | cAMP responsive element modulator                                                                           | 0.74 |
| 227753 | Gsn           | gelsolin                                                                                                    | 0.74 |
| 26394  | Lypla2        | lysophospholipase 2                                                                                         | 0.74 |
| 67299  | Dock7         | dedicator of cytokinesis 7<br>nuclear factor of kappa light chain gene enhancer in B-cells inhibitor, alpha | 0.74 |
| 18035  | Nfkbia        |                                                                                                             | 0.74 |
| 50875  | Tmod3         | tropomodulin 3                                                                                              | 0.74 |
| 105859 | Csdc2         | cold shock domain containing C2, RNA binding                                                                | 0.74 |
| 67803  | Limd2         | LIM domain containing 2                                                                                     | 0.74 |
| 78593  | Nrip3         | nuclear receptor interacting protein 3                                                                      | 0.73 |
| 19731  | Rgl1          | ral guanine nucleotide dissociation stimulator,-like 1                                                      | 0.72 |
| 72055  | 1810073N04Rik | RIKEN cDNA 1810073N04 gene                                                                                  | 0.72 |
| 14773  | Gprk5         | G protein-coupled receptor kinase 5                                                                         | 0.72 |
| 20239  | Atxn2         | ataxin 2                                                                                                    | 0.72 |
| 29875  | Iqgap1        | IQ motif containing GTPase activating protein 1                                                             | 0.72 |
| 170625 | Snag1         | sorting nexin associated golgi protein 1                                                                    | 0.72 |
| 109857 | Cbr3          | carbonyl reductase 3<br>UDP-Gal:betaGlcNAc beta 1,4-galactosyltransferase,                                  | 0.72 |
| 56386  | B4galt6       | polypeptide 6                                                                                               | 0.72 |
| 22352  | Vim           | vimentin                                                                                                    | 0.71 |
| 70772  | Ggnbp1        | gametogenetin binding protein 1                                                                             | 0.71 |
| 319719 | 4732471D19Rik | RIKEN cDNA 4732471D19 gene                                                                                  | 0.71 |
| 108673 | Ccdc86        | coiled-coil domain containing 86                                                                            | 0.71 |
| 72065  | Rap2c         | RAP2C, member of RAS oncogene family                                                                        | 0.71 |
| 12839  | Col9a1        | procollagen, type IX, alpha 1                                                                               | 0.71 |
| 24063  | Spry1         | sprouty homolog 1 ( <i>Drosophila</i> )                                                                     | 0.71 |
| 192232 | Hps4          | Hermansky-Pudlak syndrome 4 homolog (human)                                                                 | 0.71 |
| 77569  | 3732412D22Rik | RIKEN cDNA 3732412D22 gene                                                                                  | 0.71 |
| 72065  | Rap2c         | RAP2C, member of RAS oncogene family                                                                        | 0.70 |

|        |          |                                                                                                     |      |
|--------|----------|-----------------------------------------------------------------------------------------------------|------|
| 219140 | Spata13  | spermatogenesis associated 13                                                                       | 0.70 |
| 20742  | Spnb2    | spectrin beta 2                                                                                     | 0.70 |
| 234582 | Ccdc102a | coiled-coil domain containing 102A                                                                  | 0.70 |
| 67839  | Gpsm1    | G-protein signalling modulator 1 (AGS3-like, <i>C. elegans</i> )                                    | 0.70 |
| 269424 | Phf17    | PHD finger protein 17                                                                               | 0.70 |
| 101206 | Tada3l   | transcriptional adaptor 3 (NGG1 homolog, yeast)-like                                                | 0.70 |
| 12874  | Cpd      | carboxypeptidase D                                                                                  | 0.70 |
| 22682  | Za20d2   | zinc finger, A20 domain containing 2                                                                | 0.69 |
| 53602  | Hpcal1   | hippocalcin-like 1                                                                                  | 0.69 |
| 68842  | Tulp4    | tubby like protein 4                                                                                | 0.69 |
| 50754  | Fbxw7    | F-box and WD-40 domain protein 7, archipelago homolog ( <i>Drosophila</i> )                         | 0.69 |
| 11784  | Apba2    | amyloid beta (A4) precursor protein-binding, family A, member 2                                     | 0.69 |
| 432486 | Gnptab   | N-acetylglucosamine-1-phosphate transferase, alpha and beta subunits                                | 0.68 |
| 22632  | Yy1      | YY1 transcription factor                                                                            | 0.68 |
| 80877  | Lrba     | LPS-responsive beige-like anchor                                                                    | 0.68 |
| 16599  | Klf3     | Kruppel-like factor 3 (basic)                                                                       | 0.68 |
| 19739  | Rgs9     | regulator of G-protein signaling 9                                                                  | 0.67 |
| 15204  | Herc2    | hect (homologous to the E6-AP (UBE3A) carboxyl terminus) domain and RCC1 (CHC1)-like domain (RLD) 2 | 0.67 |
| 15228  | Foxg1    | forkhead box G1                                                                                     | 0.67 |
| 266692 | Cpne1    | copine I                                                                                            | 0.67 |
| 53322  | Nucb2    | nucleobindin 2                                                                                      | 0.67 |
| 83768  | Dpp7     | dipeptidylpeptidase 7                                                                               | 0.66 |
| 19084  | Prkar1a  | protein kinase, cAMP dependent regulatory, type I, alpha                                            | 0.66 |
| 13527  | Dtna     | dystrobrevin alpha                                                                                  | 0.66 |
| 74287  | Kcmf1    | potassium channel modulatory factor 1                                                               | 0.66 |
| 14225  | Fkbp1a   | FK506 binding protein 1a                                                                            | 0.66 |
| 99152  | Anapc2   | anaphase promoting complex subunit 2                                                                | 0.66 |
| 114715 | Spred1   | sprouty protein with EVH-1 domain 1, related sequence                                               | 0.66 |
| 78246  | Phf23    | PHD finger protein 23                                                                               | 0.66 |
| 19025  | Ppqb     | protective protein for beta-galactosidase                                                           | 0.66 |
| 106522 | AW548124 | expressed sequence AW548124                                                                         | 0.66 |
| 330814 | Lphn1    | latrophilin 1                                                                                       | 0.66 |
| 12313  | Calm1    | calmodulin 1                                                                                        | 0.66 |
| 207565 | Camkk2   | calcium/calmodulin-dependent protein kinase kinase 2, beta                                          | 0.66 |
| 229615 | Pias3    | protein inhibitor of activated STAT 3                                                               | 0.65 |
| 12338  | Capn6    | calpain 6                                                                                           | 0.65 |
| 67905  | Ppm1m    | protein phosphatase 1M                                                                              | 0.65 |
| 26432  | Plod2    | procollagen lysine, 2-oxoglutarate 5-dioxygenase 2                                                  | 0.64 |
| 67763  | Prpsap1  | phosphoribosyl pyrophosphate synthetase-associated protein 1                                        | 0.64 |
| 23849  | Klf6     | Kruppel-like factor 6                                                                               | 0.64 |
| 11502  | Adam9    | a disintegrin and metallopeptidase domain 9 (meltrin gamma)                                         | 0.64 |
| 216131 | Tmem1    | transmembrane protein 1                                                                             | 0.64 |

|        |               |                                                                                               |      |
|--------|---------------|-----------------------------------------------------------------------------------------------|------|
| 50786  | Hs6st2        | heparan sulfate 6-O-sulfotransferase 2                                                        | 0.64 |
| 16801  | Arhgef1       | Rho guanine nucleotide exchange factor (GEF) 1                                                | 0.64 |
| 21413  | Tcf4          | transcription factor 4                                                                        | 0.63 |
| 227937 | Pkp4          | plakophilin 4                                                                                 | 0.63 |
| 22352  | Vim           | vimentin                                                                                      | 0.63 |
| 286940 | Flnb          | filamin, beta                                                                                 | 0.63 |
| 22601  | Yap1          | yes-associated protein 1                                                                      | 0.63 |
| 18230  | Nxn           | nucleoredoxin                                                                                 | 0.62 |
| 235431 | Coro2b        | coronin, actin binding protein, 2B                                                            | 0.62 |
| 70575  | Gfod2         | glucose-fructose oxidoreductase domain containing 2                                           | 0.62 |
| 19042  | Ppm1a         | protein phosphatase 1A, magnesium dependent, alpha isoform                                    | 0.62 |
| 12313  | Calm1         | calmodulin 1                                                                                  | 0.62 |
| 22025  | Nr2c1         | nuclear receptor subfamily 2, group C, member 1                                               | 0.62 |
| 66515  | Cul7          | cullin 7                                                                                      | 0.61 |
| 56726  | Sh3bgrl       | SH3-binding domain glutamic acid-rich protein like                                            | 0.61 |
| 15975  | Ifnar1        | interferon (alpha and beta) receptor 1                                                        | 0.61 |
| 233724 | Tmem41b       | transmembrane protein 41B                                                                     | 0.61 |
| 13175  | Dcamk1        | double cortin and calcium/calmodulin-dependent protein kinase-like 1                          | 0.61 |
| 11787  | Apbb2         | amyloid beta (A4) precursor protein-binding, family B, member 2                               | 0.61 |
| 227937 | Pkp4          | plakophilin 4                                                                                 | 0.60 |
| 240913 | Adamts4       | a disintegrin-like and metallopeptidase (reprolysin type) with thrombospondin type 1 motif, 4 | 0.60 |
| 19248  | Ptpn12        | protein tyrosine phosphatase, non-receptor type 12                                            | 0.60 |
| 53867  | Col5a3        | procollagen, type V, alpha 3                                                                  | 0.60 |
| 69608  | Sec24d        | SEC24 related gene family, member D (S. cerevisiae)                                           | 0.60 |
| 12593  | Cdyl          | chromodomain protein, Y chromosome-like                                                       | 0.60 |
| 72055  | 1810073N04Rik | RIKEN cDNA 1810073N04 gene                                                                    | 0.60 |
| 57247  | Zfp276        | zinc finger protein (C2H2 type) 276                                                           | 0.59 |
| 50914  | Olig1         | oligodendrocyte transcription factor 1                                                        | 0.59 |
| 14287  | Fpgs          | folylpolyglutamyl synthetase                                                                  | 0.59 |
| 12927  | Bcar1         | breast cancer anti-estrogen resistance 1                                                      | 0.59 |
| 227700 | Sh3glb2       | SH3-domain GRB2-like endophilin B2                                                            | 0.59 |
| 12313  | Calm1         | calmodulin 1                                                                                  | 0.59 |
| 11853  | Rhoc          | ras homolog gene family, member C                                                             | 0.59 |
| 230761 | BC039093      | cDNA sequence BC039093                                                                        | 0.58 |
| 22381  | Wbp5          | WW domain binding protein 5                                                                   | 0.58 |
| 75751  | Ipo4          | importin 4                                                                                    | 0.58 |
| 19027  | Sypl          | synaptophysin-like protein                                                                    | 0.58 |
| 117606 | Boc           | biregional cell adhesion molecule-related/down-regulated by oncogenes (Cdon) binding protein  | 0.58 |
| 218397 | Rasa1         | RAS p21 protein activator 1                                                                   | 0.58 |
| 14182  | Fgfr1         | fibroblast growth factor receptor 1                                                           | 0.58 |
| 108705 | Pttg1ip       | pituitary tumor-transforming 1 interacting protein                                            | 0.58 |
| 217370 | BC017643      | cDNA sequence BC017643                                                                        | 0.57 |
| 319565 | Syne2         | synaptic nuclear envelope 2                                                                   | 0.57 |
| 224250 | Cldnd1        | claudin domain containing 1                                                                   | 0.57 |



|        |               |                                                                                                   |      |
|--------|---------------|---------------------------------------------------------------------------------------------------|------|
| 54418  | Fmn2          | formin 2                                                                                          | 0.57 |
| 56876  | Nelf          | nasal embryonic LHRH factor                                                                       | 0.57 |
| 110829 | Lims1         | LIM and senescent cell antigen-like domains 1                                                     | 0.57 |
| 16795  | Large         | like-glycosyltransferase                                                                          | 0.56 |
| 20742  | Spnb2         | spectrin beta 2                                                                                   | 0.56 |
| 110829 | Lims1         | LIM and senescent cell antigen-like domains 1                                                     | 0.56 |
| 70686  | Dusp16        | dual specificity phosphatase 16                                                                   | 0.55 |
| 229473 | D930015E06Rik | RIKEN cDNA D930015E06 gene                                                                        | 0.55 |
| 28018  | D7Wsu128e     | DNA segment, Chr 7, Wayne State University 128, expressed                                         | 0.55 |
| 18747  | Prkaca        | protein kinase, cAMP dependent, catalytic, alpha                                                  | 0.55 |
| 320011 | Ugcgl1        | UDP-glucose ceramide glucosyltransferase-like 1                                                   | 0.55 |
| 68703  | Rere          | arginine glutamic acid dipeptide (RE) repeats                                                     | 0.55 |
| 67554  | Slc25a30      | solute carrier family 25, member 30                                                               | 0.55 |
| 80515  | A030009H04Rik | RIKEN cDNA A030009H04 gene                                                                        | 0.54 |
| 13175  | Dcamk1        | double cortin and calcium/calmodulin-dependent protein kinase-like 1                              | 0.54 |
| 21679  | Tead4         | TEA domain family member 4                                                                        | 0.54 |
| 66074  | 0610041E09Rik | RIKEN cDNA 0610041E09 gene                                                                        | 0.54 |
| 13855  | Epn2          | epsin 2                                                                                           | 0.54 |
| 26557  | Homer2        | homer homolog 2 (Drosophila)                                                                      | 0.54 |
| 19697  | Rela          | v-rel reticuloendotheliosis viral oncogene homolog A (avian)                                      | 0.53 |
| 114715 | Spred1        | sprouty protein with EVH-1 domain 1, related sequence                                             | 0.53 |
| 19280  | Ptprs         | protein tyrosine phosphatase, receptor type, S                                                    | 0.53 |
| 232944 | Mark4         | MAP/microtubule affinity-regulating kinase 4                                                      | 0.53 |
| 19248  | Ptpn12        | protein tyrosine phosphatase, non-receptor type 12                                                | 0.53 |
| 22632  | Yy1           | YY1 transcription factor                                                                          | 0.53 |
| 108705 | Pttg1ip       | pituitary tumor-transforming 1 interacting protein                                                | 0.53 |
| 228829 | Phf20         | PHD finger protein 20                                                                             | 0.53 |
| 236520 | 9130229H14Rik | RIKEN cDNA 9130229H14 gene                                                                        | 0.53 |
| 228829 | Phf20         | PHD finger protein 20                                                                             | 0.52 |
| 54151  | Cyhr1         | cysteine and histidine rich 1                                                                     | 0.52 |
| 26433  | Plod3         | procollagen-lysine, 2-oxoglutarate 5-dioxygenase 3                                                | 0.52 |
| 12142  | Prdm1         | PR domain containing 1, with ZNF domain                                                           | 0.52 |
| 12505  | Cd44          | CD44 antigen                                                                                      | 0.51 |
| 17246  | Mdm2          | transformed mouse 3T3 cell double minute 2                                                        | 0.51 |
| 65113  | Ndfip1        | Nedd4 family interacting protein 1                                                                | 0.51 |
| 107702 | Rnh1          | ribonuclease/angiogenin inhibitor 1                                                               | 0.51 |
| 106633 | Ift140        | intraflagellar transport 140 homolog (Chlamydomonas)                                              | 0.51 |
| 12575  | Cdkn1a        | cyclin-dependent kinase inhibitor 1A (P21)                                                        | 0.50 |
| 23955  | Nek4          | NIMA (never in mitosis gene a)-related expressed kinase 4                                         | 0.50 |
| 83796  | Smarcd2       | SWI/SNF related, matrix associated, actin dependent regulator of chromatin, subfamily d, member 2 | 0.50 |
| 218397 | Rasa1         | RAS p21 protein activator 1                                                                       | 0.50 |
| 225010 | Lycat         | lysocardiolipin acyltransferase                                                                   | 0.50 |

|        |               |                                                                                                   |      |
|--------|---------------|---------------------------------------------------------------------------------------------------|------|
| 57376  | Smarce1       | SWI/SNF related, matrix associated, actin dependent regulator of chromatin, subfamily e, member 1 | 0.50 |
| 232440 | H2afj         | H2A histone family, member J                                                                      | 0.50 |
| 56726  | Sh3bgrl       | SH3-binding domain glutamic acid-rich protein like                                                | 0.50 |
| 50754  | Fbxw7         | F-box and WD-40 domain protein 7, archipelago homolog (Drosophila)                                | 0.50 |
| 234407 | Glt25d1       | glycosyltransferase 25 domain containing 1                                                        | 0.50 |
| 66999  | Med28         | mediator of RNA polymerase II transcription, subunit 28 homolog (yeast)                           | 0.50 |
| 18764  | Pkd2          | polycystic kidney disease 2                                                                       | 0.50 |
| 14924  | Magi1         | membrane associated guanylate kinase, WW and PDZ domain containing 1                              | 0.49 |
| 51793  | Ddah2         | dimethylarginine dimethylaminohydrolase 2                                                         | 0.49 |
| 20068  | Rps17         | ribosomal protein S17                                                                             | 0.49 |
| 331563 | C130006E23    | hypothetical protein C130006E23                                                                   | 0.49 |
| 20742  | Spnb2         | spectrin beta 2                                                                                   | 0.49 |
| 16976  | Lrpap1        | low density lipoprotein receptor-related protein associated protein 1                             | 0.49 |
| 67298  | Gprasp1       | G protein-coupled receptor associated sorting protein 1                                           | 0.48 |
| 233724 | Tmem41b       | transmembrane protein 41B                                                                         | 0.48 |
| 14924  | Magi1         | membrane associated guanylate kinase, WW and PDZ domain containing 1                              | 0.48 |
| 226525 | Rasal2        | RAS protein activator like 2                                                                      | 0.47 |
| 226178 | D19Wsu162e    | DNA segment, Chr 19, Wayne State University 162, expressed                                        | 0.47 |
| 56205  | Ensa          | endosulfine alpha                                                                                 | 0.47 |
| 330814 | Lphn1         | latrophilin 1                                                                                     | 0.47 |
| 211548 | Nomo1         | nodal modulator 1                                                                                 | 0.47 |
| 14225  | Fkbp1a        | FK506 binding protein 1a                                                                          | 0.47 |
| 20623  | Snrk          | SNF related kinase                                                                                | 0.47 |
| 93836  | Rnf111        | ring finger 111                                                                                   | 0.47 |
| 19089  | Prkcsh        | protein kinase C substrate 80K-H                                                                  | 0.47 |
| 19291  | Purb          | purine rich element binding protein B                                                             | 0.47 |
| 109674 | Ampd2         | adenosine monophosphate deaminase 2 (isoform L)                                                   | 0.46 |
| 27081  | Zfp275        | zinc finger protein 275                                                                           | 0.46 |
| 78521  | B230219D22Rik | RIKEN cDNA B230219D22 gene                                                                        | 0.46 |
| 75605  | Jarid1b       | jumonji, AT rich interactive domain 1B (Rbp2 like)                                                | 0.46 |
| 53421  | Sec61a1       | Sec61 alpha 1 subunit (S. cerevisiae)                                                             | 0.46 |
| 20227  | Sart1         | squamous cell carcinoma antigen recognized by T-cells 1                                           | 0.46 |
| 234023 | 9430010O03Rik | RIKEN cDNA 9430010O03 gene                                                                        | 0.45 |
| 227648 | AU024582      | expressed sequence AU024582                                                                       | 0.45 |
| 74585  | Sppl3         | signal peptide peptidase 3                                                                        | 0.45 |
| 217864 | Rcor1         | REST corepressor 1                                                                                | 0.45 |
| 19056  | Ppp3cb        | protein phosphatase 3, catalytic subunit, beta isoform                                            | 0.44 |
| 13542  | Dvl1          | dishevelled, dsh homolog 1 (Drosophila)                                                           | 0.44 |
| 228994 | Ythdf1        | YTH domain family 1                                                                               | 0.44 |
| 16570  | Kif3c         | kinesin family member 3C                                                                          | 0.43 |

|        |               |                                                           |      |
|--------|---------------|-----------------------------------------------------------|------|
| 100210 | Atpbd1b       | ATP binding domain 1 family, member B                     | 0.43 |
| 78656  | Brd8          | bromodomain containing 8                                  | 0.43 |
| 20624  | Eftud2        | elongation factor Tu GTP binding domain containing 2      | 0.43 |
| 68911  | Pygo2         | pygopus 2                                                 | 0.43 |
| 14225  | Fkbp1a        | FK506 binding protein 1a                                  | 0.43 |
| 16451  | Jak1          | Janus kinase 1                                            | 0.42 |
| 19365  | Rad52         | RAD52 homolog ( <i>S. cerevisiae</i> )                    | 0.42 |
| 269774 | Aak1          | AP2 associated kinase 1                                   | 0.42 |
| 193742 | Bat5          | HLA-B associated transcript 5                             | 0.42 |
| 28006  | D6Wsu116e     | DNA segment, Chr 6, Wayne State University 116, expressed | 0.41 |
| 97287  | 1110061O04Rik | RIKEN cDNA 1110061O04 gene                                | 0.41 |
| 21413  | Tcf4          | transcription factor 4                                    | 0.41 |
| 57773  | Wdr4          | WD repeat domain 4                                        | 0.41 |
| 14265  | Fmr1          | fragile X mental retardation syndrome 1 homolog           | 0.41 |
| 68379  | Ciz1          | CDKN1A interacting zinc finger protein 1                  | 0.40 |
| 22221  | Ubp1          | upstream binding protein 1                                | 0.40 |
| 19342  | Rab4b         | RAB4B, member RAS oncogene family                         | 0.40 |
| 103583 | Fbxw11        | F-box and WD-40 domain protein 11                         | 0.40 |
| 67760  | Slc38a2       | solute carrier family 38, member 2                        | 0.40 |
| 12876  | Cpe           | carboxypeptidase E                                        | 0.40 |
| 22401  | Wig1          | wild-type p53-induced gene 1                              | 0.39 |
| 106143 | Cggbp1        | CGG triplet repeat binding protein 1                      | 0.39 |
| 67287  | Parp6         | poly (ADP-ribose) polymerase family, member 6             | 0.39 |
| 66646  | Rpe           | ribulose-5-phosphate-3-epimerase                          | 0.39 |
| 12751  | Tpp1          | tripeptidyl peptidase I                                   | 0.39 |
| 217127 | Myst2         | MYST histone acetyltransferase 2                          | 0.39 |
| 74315  | 3732413111Rik | RIKEN cDNA 3732413111 gene                                | 0.38 |
| 78656  | Brd8          | bromodomain containing 8                                  | 0.38 |
| 17122  | Mxd4          | Max dimerization protein 4                                | 0.38 |
| 192192 | Shkbp1        | Sh3kbp1 binding protein 1                                 | 0.38 |
| 80517  | Herpud2       | HERPUD family member 2                                    | 0.38 |
| 68964  | 1500010J02Rik | RIKEN cDNA 1500010J02 gene                                | 0.37 |
| 66498  | 1500034J01Rik | RIKEN cDNA 1500034J01 gene                                | 0.37 |
| 97064  | Wwtr1         | WW domain containing transcription regulator 1            | 0.37 |
| 21413  | Tcf4          | transcription factor 4                                    | 0.37 |
| 21848  | Trim24        | tripartite motif protein 24                               | 0.37 |
| 67160  | Eef1g         | eukaryotic translation elongation factor 1 gamma          | 0.36 |
| 13043  | Ctnn          | cortactin                                                 | 0.36 |
| 216856 | Nlgn2         | neuroligin 2                                              | 0.36 |
| 54383  | Phc2          | polyhomeotic-like 2 ( <i>Drosophila</i> )                 | 0.36 |
| 21982  | Tparl         | TPA regulated locus                                       | 0.36 |
| 66642  | Ctnnb1        | catenin, beta like 1                                      | 0.36 |
| 18458  | Pabpc1        | poly A binding protein, cytoplasmic 1                     | 0.36 |
| 64652  | Nisch         | nischarin                                                 | 0.36 |

|        |               |                                                                                                                 |      |
|--------|---------------|-----------------------------------------------------------------------------------------------------------------|------|
| 66494  | 2610524G07Rik | RIKEN cDNA 2610524G07 gene                                                                                      | 0.36 |
| 320394 | Cenpt         | centromere protein T                                                                                            | 0.35 |
| 67399  | Pdlim7        | PDZ and LIM domain 7                                                                                            | 0.35 |
| 20163  | Rsu1          | Ras suppressor protein 1                                                                                        | 0.35 |
| 218236 | BC010304      | cDNA sequence BC010304                                                                                          | 0.34 |
| 65105  | Arl6ip4       | ADP-ribosylation factor-like 6 interacting protein 4                                                            | 0.34 |
| 107338 | Gbf1          | golgi-specific brefeldin A-resistance factor 1                                                                  | 0.33 |
| 66411  | Ckap1         | cytoskeleton-associated protein 1                                                                               | 0.33 |
| 12660  | Chka          | choline kinase alpha                                                                                            | 0.33 |
| 66923  | Pb1           | polybromo 1                                                                                                     | 0.33 |
| 18222  | Numb          | numb gene homolog (Drosophila)                                                                                  | 0.33 |
| 83486  | Rbm5          | RNA binding motif protein 5                                                                                     | 0.33 |
| 71765  | Klhdc3        | kelch domain containing 3                                                                                       | 0.33 |
| 54170  | Rragc         | Ras-related GTP binding C                                                                                       | 0.32 |
| 104418 | Dgkz          | diacylglycerol kinase zeta                                                                                      | 0.32 |
| 14758  | Gpm6b         | glycoprotein m6b                                                                                                | 0.32 |
| 22121  | Rpl13a        | ribosomal protein L13a                                                                                          | 0.32 |
| 67268  | 2900073G15Rik | RIKEN cDNA 2900073G15 gene                                                                                      | 0.32 |
| 23918  | Impdh2        | inosine 5'-phosphate dehydrogenase 2                                                                            | 0.31 |
| 20586  | Smarca4       | SWI/SNF related, matrix associated, actin dependent regulator of chromatin, subfamily a, member 4               | 0.31 |
| 73218  | 3110056O03Rik | RIKEN cDNA 3110056O03 gene                                                                                      | 0.31 |
| 19079  | Prkab1        | protein kinase, AMP-activated, beta 1 non-catalytic subunit                                                     | 0.30 |
| 16202  | Ilk           | integrin linked kinase                                                                                          | 0.30 |
| 17210  | Mcl1          | myeloid cell leukemia sequence 1                                                                                | 0.30 |
| 19325  | Rab10         | RAB10, member RAS oncogene family                                                                               | 0.30 |
| 75415  | Arhgap12      | Rho GTPase activating protein 12                                                                                | 0.30 |
| 69981  | Tmem30a       | transmembrane protein 30A                                                                                       | 0.30 |
| 66235  | Eif1ay        | eukaryotic translation initiation factor 1A, Y-linked ZW10 homolog (Drosophila), centromere/kinetochore protein | 0.30 |
| 26951  | Zw10          | ubiquitin-conjugating enzyme E2G 1 (UBC7 homolog, C. elegans)                                                   | 0.29 |
| 67128  | Ube2g1        | ubiquitin-conjugating enzyme E2G 1 (UBC7 homolog, C. elegans)                                                   | 0.29 |
| 544752 | Tug1          | taurine upregulated gene 1                                                                                      | 0.29 |
| 13018  | Ctcf          | CCCTC-binding factor                                                                                            | 0.29 |
| 56787  | Ascl3         | achaete-scute complex homolog-like 3 (Drosophila)                                                               | 0.28 |
| 19324  | Rab1          | RAB1, member RAS oncogene family                                                                                | 0.28 |
| 21413  | Tcf4          | transcription factor 4                                                                                          | 0.28 |
| 207165 | Falz          | fetal Alzheimer antigen                                                                                         | 0.28 |
| 20832  | Ssr4          | signal sequence receptor, delta                                                                                 | 0.28 |
| 268996 | Ss18          | synovial sarcoma translocation, Chromosome 18                                                                   | 0.28 |
| 192231 | Hexim1        | hexamethylene bis-acetamide inducible 1                                                                         | 0.27 |
| 12151  | Bmi1          | B lymphoma Mo-MLV insertion region 1                                                                            | 0.27 |
| 103554 | Psme4         | proteasome (prosome, macropain) activator subunit 4                                                             | 0.27 |
| 73744  | Man2c1        | mannosidase, alpha, class 2C, member 1                                                                          | 0.25 |
| 53599  | Cd164         | CD164 antigen                                                                                                   | 0.25 |
| 17524  | Mpp1          | membrane protein, palmitoylated                                                                                 | 0.25 |

|        |           |                                                                                           |      |
|--------|-----------|-------------------------------------------------------------------------------------------|------|
| 26430  | Parg      | poly (ADP-ribose) glycohydrolase                                                          | 0.25 |
| 54401  | Ywhab     | tyrosine 3-monooxygenase/tryptophan 5-monooxygenase activation protein, beta polypeptide  | 0.25 |
| 28088  | D10Wsu52e | DNA segment, Chr 10, Wayne State University 52, expressed                                 | 0.24 |
| 54616  | Extl3     | exostoses (multiple)-like 3                                                               | 0.24 |
| 22121  | Rpl13a    | ribosomal protein L13a                                                                    | 0.23 |
| 71994  | Cnn3      | calponin 3, acidic                                                                        | 0.23 |
| 13046  | Cugbp1    | CUG triplet repeat, RNA binding protein 1                                                 | 0.22 |
| 70356  | St13      | suppression of tumorigenicity 13                                                          | 0.22 |
| 67040  | Ddx17     | DEAD (Asp-Glu-Ala-Asp) box polypeptide 17                                                 | 0.22 |
| 19042  | Ppm1a     | protein phosphatase 1A, magnesium dependent, alpha isoform                                | 0.20 |
| 20843  | Stag2     | stromal antigen 2                                                                         | 0.20 |
| 71994  | Cnn3      | calponin 3, acidic                                                                        | 0.19 |
| 320717 | Pptc7     | PTC7 protein phosphatase homolog ( <i>S. cerevisiae</i> )                                 | 0.19 |
| 22210  | Ube2b     | ubiquitin-conjugating enzyme E2B, RAD6 homology ( <i>S. cerevisiae</i> )                  | 0.18 |
| 54401  | Ywhab     | tyrosine 3-monooxygenase/tryptophan 5-monooxygenase activation protein, beta polypeptide  | 0.17 |
| 108143 | Taf9      | TAF9 RNA polymerase II, TATA box binding protein (TBP)-associated factor                  | 0.17 |
| 22630  | Ywhaq     | tyrosine 3-monooxygenase/tryptophan 5-monooxygenase activation protein, theta polypeptide | 0.15 |
| 107358 | Tm9sf3    | transmembrane 9 superfamily member 3                                                      | 0.13 |
| 14489  | Mtpn      | myotrophin                                                                                | 0.10 |
| 19989  | Rpl7      | ribosomal protein L7                                                                      | 0.06 |
| 110954 | Rpl10     | ribosomal protein 10                                                                      | 0.06 |
| 20055  | Rps16     | ribosomal protein S16                                                                     | 0.05 |
| 19896  | Rpl10a    | ribosomal protein L10A                                                                    | 0.05 |
| 16898  | Rps2      | ribosomal protein S2                                                                      | 0.05 |
| 66480  | Rpl15     | ribosomal protein L15                                                                     | 0.05 |
| 20054  | Rps15     | ribosomal protein S15                                                                     | 0.04 |

**Supplemental Table 1.** Summary of probe sets de-repressed in Olig-2 null

neurospheres relative to wild-type neurospheres. The genes present on this list have an increased level of expression relative to wild type neurosphere. The fold change is reported as the log (base 2) of the difference. See Figure 6 for methods.

**Supplementary Table 2. Genes with downregulated expression in Olig2 KO vs. WT NSCs**

| Gene ID | Gene Symbol | Gene Name                                                                                                                                   | Average Fold Change (log2) |
|---------|-------------|---------------------------------------------------------------------------------------------------------------------------------------------|----------------------------|
| 16525   | Kcnk1       | potassium channel, subfamily K, member 1                                                                                                    | 4.27                       |
| 18377   | Omg         | oligodendrocyte myelin glycoprotein                                                                                                         | 4.18                       |
| 171580  | Mical1      | microtubule associated monooxygenase, calponin and LIM domain containing 1                                                                  | 3.98                       |
| 171580  | Mical1      | microtubule associated monooxygenase, calponin and LIM domain containing 1                                                                  | 3.9                        |
| 12955   | Cryab       | crystallin, alpha B                                                                                                                         | 3.81                       |
| 56710   | Dbc1        | deleted in bladder cancer 1 (human)                                                                                                         | 3.7                        |
| 18595   | Pdgfra      | platelet derived growth factor receptor, alpha polypeptide                                                                                  | 3.68                       |
| 13508   | Dscam       | Down syndrome cell adhesion molecule                                                                                                        | 3.68                       |
| 18761   | Prkcq       | protein kinase C, theta                                                                                                                     | 3.63                       |
| 67755   | Ddx47       | DEAD (Asp-Glu-Ala-Asp) box polypeptide 47                                                                                                   | 3.57                       |
| 16508   | Kcnd2       | potassium voltage-gated channel, Shal-related family, member 2                                                                              | 3.45                       |
| 116731  | Pcdha1      | protocadherin alpha 1                                                                                                                       | 3.45                       |
| 268543  | G630039L02  | hypothetical protein G630039L02                                                                                                             | 3.43                       |
| 16508   | Kcnd2       | potassium voltage-gated channel, Shal-related family, member 2                                                                              | 3.41                       |
| 54159   | Ear5        | eosinophil-associated, ribonuclease A family, member 5                                                                                      | 3.4                        |
| 11658   | Alcam       | activated leukocyte cell adhesion molecule                                                                                                  | 3.39                       |
| 12870   | Cp          | ceruloplasmin                                                                                                                               | 3.32                       |
| 16186   | Il2rg       | interleukin 2 receptor, gamma chain                                                                                                         | 3.28                       |
| 14160   | Lgr5        | leucine rich repeat containing G protein coupled receptor 5                                                                                 | 3.23                       |
| 16842   | Lef1        | lymphoid enhancer binding factor 1                                                                                                          | 3.12                       |
| 116731  | Pcdha1      | protocadherin alpha 1                                                                                                                       | 3.09                       |
| 226922  | Kcnq5       | potassium voltage-gated channel, subfamily Q, member 5                                                                                      | 3.05                       |
| 12955   | Cryab       | crystallin, alpha B                                                                                                                         | 3.03                       |
| 20356   | Sema5a      | sema domain, seven thrombospondin repeats (type 1 and type 1-like), transmembrane domain (TM) and short cytoplasmic domain, (semaphorin) 5A | 3.01                       |
| 12319   | Car8        | carbonic anhydrase 8                                                                                                                        | 2.99                       |
| 17196   | Mbp         | myelin basic protein                                                                                                                        | 2.98                       |
| 252838  | Tox         | thymocyte selection-associated HMG box gene                                                                                                 | 2.94                       |
| 17196   | Mbp         | myelin basic protein                                                                                                                        | 2.93                       |
| 216613  | Ccdc85a     | coiled-coil domain containing 85A                                                                                                           | 2.92                       |
| 15203   | Heph        | hephaestin                                                                                                                                  | 2.91                       |
| 18823   | Plp1        | proteolipid protein (myelin) 1                                                                                                              | 2.89                       |
| 17196   | Mbp         | myelin basic protein                                                                                                                        | 2.89                       |
| 16508   | Kcnd2       | potassium voltage-gated channel, Shal-related family, member 2                                                                              | 2.88                       |
| 219134  | Tmem46      | transmembrane protein 46                                                                                                                    | 2.87                       |
| 14871   | Gstt1       | glutathione S-transferase, theta 1                                                                                                          | 2.87                       |

|        |               |                                                                                                               |      |
|--------|---------------|---------------------------------------------------------------------------------------------------------------|------|
| 67448  | Plxdc2        | plexin domain containing 2                                                                                    | 2.87 |
| 23967  | Osr1          | odd-skipped related 1 (Drosophila)                                                                            | 2.85 |
| 16525  | Kcnk1         | potassium channel, subfamily K, member 1                                                                      | 2.84 |
| 78558  | Htra3         | HtrA serine peptidase 3                                                                                       | 2.84 |
| 66270  | 1810015C04Rik | RIKEN cDNA 1810015C04 gene                                                                                    | 2.83 |
| 223433 | BC052328      | cDNA sequence BC052328                                                                                        | 2.8  |
| 12263  | C2            | complement component 2 (within H-2S)                                                                          | 2.78 |
| 12805  | Cntn1         | contactin 1                                                                                                   | 2.76 |
| 18526  | Pcdh10        | protocadherin 10                                                                                              | 2.75 |
| 57740  | Stk32c        | serine/threonine kinase 32C                                                                                   | 2.74 |
| 16658  | Mafb          | v-maf musculoaponeurotic fibrosarcoma oncogene family, protein B (avian)                                      | 2.73 |
| 64214  | Rgs18         | regulator of G-protein signaling 18                                                                           | 2.73 |
| 13612  | Edil3         | EGF-like repeats and discoidin I-like domains 3                                                               | 2.73 |
| 14248  | Fliih         | flightless I homolog (Drosophila)                                                                             | 2.72 |
| 23794  | Adamts5       | a disintegrin-like and metallopeptidase (reprolysin type) with thrombospondin type 1 motif, 5 (aggrecanase-2) | 2.71 |
| 13137  | Daf2          | decay accelerating factor 2                                                                                   | 2.69 |
| 320557 | B230112C05Rik | RIKEN cDNA B230112C05 gene                                                                                    | 2.67 |
| 66607  | Ms4a4d        | membrane-spanning 4-domains, subfamily A, member 4D                                                           | 2.67 |
| 116731 | Pcdha1        | protocadherin alpha 1                                                                                         | 2.65 |
| 12552  | Cdh11         | cadherin 11                                                                                                   | 2.65 |
| 225341 | Lims2         | LIM and senescent cell antigen like domains 2                                                                 | 2.64 |
| 71704  | Arhgef3       | Rho guanine nucleotide exchange factor (GEF) 3                                                                | 2.64 |
| 12964  | Cryga         | crystallin, gamma A                                                                                           | 2.63 |
| 66434  | 2010003O02Rik | RIKEN cDNA 2010003O02 gene                                                                                    | 2.63 |
| 67634  | Ftmt          | ferritin mitochondrial                                                                                        | 2.61 |
| 17870  | Mycs          | myc-like oncogene, s-myc protein                                                                              | 2.56 |
| 27368  | Tbl2          | transducin (beta)-like 2                                                                                      | 2.56 |
| 103098 | Slc6a15       | solute carrier family 6 (neurotransmitter transporter), member 15                                             | 2.56 |
| 12870  | Cp            | ceruloplasmin                                                                                                 | 2.54 |
| 30054  | Rnf17         | ring finger protein 17                                                                                        | 2.5  |
| 12569  | Cdk5r1        | cyclin-dependent kinase 5, regulatory subunit (p35) 1                                                         | 2.49 |
| 20471  | Six1          | sine oculis-related homeobox 1 homolog (Drosophila)                                                           | 2.48 |
| 53870  | Cntn6         | contactin 6                                                                                                   | 2.48 |
| 20563  | Slit2         | slit homolog 2 (Drosophila)                                                                                   | 2.46 |
| 50913  | Olig2         | oligodendrocyte transcription factor 2                                                                        | 2.45 |
| 107831 | Bai1          | brain-specific angiogenesis inhibitor 1                                                                       | 2.43 |
| 216829 | BC025076      | cDNA sequence BC025076                                                                                        | 2.43 |
| 114304 | Slc28a3       | solute carrier family 28 (sodium-coupled nucleoside transporter), member 3                                    | 2.43 |
| 22317  | Vamp1         | vesicle-associated membrane protein 1                                                                         | 2.42 |
| 13661  | Ehf           | ets homologous factor                                                                                         | 2.42 |
| 12010  | B2m           | beta-2 microglobulin                                                                                          | 2.39 |
| 14860  | Gsta4         | glutathione S-transferase, alpha 4                                                                            | 2.36 |
| 13123  | Cyp7b1        | cytochrome P450, family 7, subfamily b, polypeptide 1                                                         | 2.32 |

|        |               |                                                                                                         |      |
|--------|---------------|---------------------------------------------------------------------------------------------------------|------|
| 432700 | -             | -                                                                                                       | 2.31 |
| 17885  | Myh8          | myosin, heavy polypeptide 8, skeletal muscle, perinatal                                                 | 2.3  |
| 18606  | Enpp2         | ectonucleotide pyrophosphatase/phosphodiesterase 2                                                      | 2.3  |
| 18424  | Otx2          | orthodenticle homolog 2 (Drosophila)                                                                    | 2.28 |
| 79196  | Osbp15        | oxysterol binding protein-like 5                                                                        | 2.26 |
| 118446 | Gje1          | gap junction membrane channel protein epsilon 1                                                         | 2.26 |
| 20312  | Cx3cl1        | chemokine (C-X3-C motif) ligand 1                                                                       | 2.24 |
| 72058  | Jam4          | junction adhesion molecule 4                                                                            | 2.23 |
| 14025  | Bcl11a        | B-cell CLL/lymphoma 11A (zinc finger protein)                                                           | 2.22 |
| 22329  | Vcam1         | vascular cell adhesion molecule 1                                                                       | 2.2  |
| 14405  | Gabrg1        | gamma-aminobutyric acid (GABA-A) receptor, subunit gamma 1                                              | 2.19 |
| 12805  | Cntn1         | contactin 1                                                                                             | 2.17 |
| 12319  | Car8          | carbonic anhydrase 8                                                                                    | 2.17 |
| 117066 | Cts3          | cathepsin 3                                                                                             | 2.16 |
| 11819  | Nr2f2         | nuclear receptor subfamily 2, group F, member 2                                                         | 2.16 |
| 20510  | Slc1a1        | solute carrier family 1 (neuronal/epithelial high affinity glutamate transporter, system Xag), member 1 | 2.14 |
| 331531 | AV320801      | expressed sequence AV320801                                                                             | 2.14 |
| 328092 | 6530401N04Rik | RIKEN cDNA 6530401N04 gene                                                                              | 2.13 |
| 12889  | Cplx1         | complexin 1                                                                                             | 2.12 |
| 71660  | Rarres2       | retinoic acid receptor responder (tazarotene induced) 2                                                 | 2.11 |
| 225994 | BC016495      | cDNA sequence BC016495                                                                                  | 2.1  |
| 11745  | Anxa3         | annexin A3                                                                                              | 2.1  |
| 27428  | Shrm          | shroom                                                                                                  | 2.09 |
| 15132  | Hbb-bh1       | hemoglobin Z, beta-like embryonic chain                                                                 | 2.09 |
| 26875  | Pclo          | piccolo (presynaptic cytomatrix protein)                                                                | 2.09 |
| 14396  | Gabra3        | gamma-aminobutyric acid (GABA-A) receptor, subunit alpha 3                                              | 2.09 |
| 22063  | Trpc1         | transient receptor potential cation channel, subfamily C, member 1                                      | 2.08 |
| 26365  | Ceacam1       | CEA-related cell adhesion molecule 1                                                                    | 2.07 |
| 11418  | Accn1         | amiloride-sensitive cation channel 1, neuronal (degenerin)                                              | 2.07 |
| 70546  | Zdhhc2        | zinc finger, DHHC domain containing 2                                                                   | 2.06 |
| 20617  | Snca          | synuclein, alpha                                                                                        | 2.06 |
| 12870  | Cp            | ceruloplasmin                                                                                           | 2.05 |
| 14168  | Fgf13         | fibroblast growth factor 13                                                                             | 2.02 |
| 245555 | C77370        | expressed sequence C77370                                                                               | 2    |
| 12565  | Cdh9          | cadherin 9                                                                                              | 2    |
| 17880  | Myh11         | myosin, heavy polypeptide 11, smooth muscle                                                             | 2    |
| 54216  | Pcdh7         | protocadherin 7                                                                                         | 1.99 |
| 20754  | Spr1b         | small proline-rich protein 1B                                                                           | 1.99 |
| 19259  | Ptpn5         | protein tyrosine phosphatase, non-receptor type 5                                                       | 1.98 |
| 29867  | Cabp1         | calcium binding protein 1                                                                               | 1.95 |
| 74100  | Arpp21        | cyclic AMP-regulated phosphoprotein, 21                                                                 | 1.95 |
| 16114  | Igk-V28       | immunoglobulin kappa chain variable 28 (V28)                                                            | 1.95 |
| 17231  | Mcpt8         | mast cell protease 8                                                                                    | 1.94 |
| 17305  | Mfng          | manic fringe homolog (Drosophila)                                                                       | 1.93 |



|        |               |                                                                                   |      |
|--------|---------------|-----------------------------------------------------------------------------------|------|
| 73390  | 1700060H10Rik | RIKEN cDNA 1700060H10 gene                                                        | 1.92 |
| 54712  | Plxnc1        | plexin C1                                                                         | 1.92 |
| 12162  | Bmp7          | bone morphogenetic protein 7                                                      | 1.91 |
| 121021 | Cspg4         | chondroitin sulfate proteoglycan 4                                                | 1.9  |
| 54353  | Scap2         | src family associated phosphoprotein 2                                            | 1.9  |
| 54712  | Plxnc1        | plexin C1                                                                         | 1.89 |
| 12293  | Cacna2d1      | calcium channel, voltage-dependent, alpha2/delta subunit 1                        | 1.87 |
| 64011  | Nrgn          | neurogranin                                                                       | 1.87 |
| 11484  | Aspa          | aspartoacylase (aminoacylase) 2                                                   | 1.86 |
| 140709 | Emid2         | EMI domain containing 2                                                           | 1.86 |
| 21388  | Tbx5          | T-box 5                                                                           | 1.85 |
| 64450  | Gpr85         | G protein-coupled receptor 85                                                     | 1.84 |
| 18823  | Plp1          | proteolipid protein (myelin) 1                                                    | 1.84 |
| 22329  | Vcam1         | vascular cell adhesion molecule 1                                                 | 1.84 |
| 64450  | Gpr85         | G protein-coupled receptor 85                                                     | 1.84 |
| 14433  | LOC14433      | similar to glyceraldehyde-3-phosphate dehydrogenase                               | 1.84 |
| 11488  | Adam11        | a disintegrin and metallopeptidase domain 11                                      | 1.83 |
| 11519  | Add2          | adducin 2 (beta)                                                                  | 1.82 |
| 18574  | Pde1b         | phosphodiesterase 1B, Ca <sup>2+</sup> -calmodulin dependent                      | 1.81 |
| 235402 | Lrrn6a        | leucine rich repeat neuronal 6A                                                   | 1.81 |
| 21984  | Tpbpa         | trophoblast specific protein alpha                                                | 1.81 |
| 17174  | Masp1         | mannan-binding lectin serine peptidase 1                                          | 1.8  |
| 12386  | Ctnna2        | catenin (cadherin associated protein), alpha 2                                    | 1.79 |
| 319504 | C130076O07Rik | RIKEN cDNA C130076O07 gene                                                        | 1.79 |
| 114642 | Brdt          | bromodomain, testis-specific                                                      | 1.78 |
| 54377  | Cacng4        | calcium channel, voltage-dependent, gamma subunit 4                               | 1.77 |
| 54561  | Nap1l3        | nucleosome assembly protein 1-like 3                                              | 1.77 |
| 17968  | Ncam2         | neural cell adhesion molecule 2                                                   | 1.77 |
| 234593 | Ndr4          | N-myc downstream regulated gene 4                                                 | 1.77 |
| 20394  | Scg5          | secretogranin V                                                                   | 1.77 |
| 77945  | Rpgrip1       | retinitis pigmentosa GTPase regulator interacting protein 1                       | 1.76 |
| 170717 | AF119384      | cDNA sequence AF119384                                                            | 1.75 |
| 19017  | Ppargc1a      | peroxisome proliferative activated receptor, gamma, coactivator 1 alpha           | 1.74 |
| 11790  | Speg          | SPEG complex locus                                                                | 1.74 |
| 70546  | Zdhhc2        | zinc finger, DHHC domain containing 2                                             | 1.73 |
| 17470  | Cd200         | Cd200 antigen                                                                     | 1.72 |
| 19017  | Ppargc1a      | peroxisome proliferative activated receptor, gamma, coactivator 1 alpha           | 1.72 |
| 72016  | 1600002H07Rik | RIKEN cDNA 1600002H07 gene                                                        | 1.69 |
| 17751  | Mt3           | metallothionein 3                                                                 | 1.68 |
| 52538  | Acaa2         | acetyl-Coenzyme A acyltransferase 2 (mitochondrial 3-oxoacyl-Coenzyme A thiolase) | 1.67 |
| 14254  | Flt1          | FMS-like tyrosine kinase 1                                                        | 1.67 |
| 27413  | Abcb11        | ATP-binding cassette, sub-family B (MDR/TAP), member 11                           | 1.66 |

|        |               |                                                                                       |      |
|--------|---------------|---------------------------------------------------------------------------------------|------|
| 50505  | Ercc4         | excision repair cross-complementing rodent repair deficiency, complementation group 4 | 1.65 |
| 19225  | Ptgs2         | prostaglandin-endoperoxide synthase 2                                                 | 1.65 |
| 22658  | Pcgf2         | polycomb group ring finger 2                                                          | 1.65 |
| 14405  | Gabrg1        | gamma-aminobutyric acid (GABA-A) receptor, subunit gamma 1                            | 1.65 |
| 15208  | Hes5          | hairy and enhancer of split 5 (Drosophila)                                            | 1.64 |
| 12870  | Cp            | ceruloplasmin                                                                         | 1.63 |
| 74100  | Arpp21        | cyclic AMP-regulated phosphoprotein, 21                                               | 1.63 |
| 16372  | Irx2          | Iroquois related homeobox 2 (Drosophila)                                              | 1.62 |
| 14378  | G6pc2         | glucose-6-phosphatase, catalytic, 2                                                   | 1.61 |
| 19017  | Ppargc1a      | peroxisome proliferative activated receptor, gamma, coactivator 1 alpha               | 1.61 |
| 20617  | Snca          | synuclein, alpha                                                                      | 1.61 |
| 19281  | Ptprt         | protein tyrosine phosphatase, receptor type, T                                        | 1.6  |
| 27276  | Plekhb1       | pleckstrin homology domain containing, family B (evectins) member 1                   | 1.6  |
| 12870  | Cp            | ceruloplasmin                                                                         | 1.58 |
| 12519  | Cd80          | CD80 antigen                                                                          | 1.58 |
| 71911  | Bdh1          | 3-hydroxybutyrate dehydrogenase, type 1                                               | 1.58 |
| 17174  | Masp1         | mannan-binding lectin serine peptidase 1                                              | 1.58 |
| 20312  | Cx3cl1        | chemokine (C-X3-C motif) ligand 1                                                     | 1.58 |
| 20295  | Ccl17         | chemokine (C-C motif) ligand 17                                                       | 1.57 |
| 15208  | Hes5          | hairy and enhancer of split 5 (Drosophila)                                            | 1.57 |
| 66193  | 1110049F12Rik | RIKEN cDNA 1110049F12 gene                                                            | 1.57 |
| 59125  | Nek7          | NIMA (never in mitosis gene a)-related expressed kinase 7                             | 1.56 |
| 71904  | Paqr7         | progesterin and adipoQ receptor family member VII                                     | 1.56 |
| 76886  | 6430514L14Rik | RIKEN cDNA 6430514L14 gene                                                            | 1.56 |
| 14166  | Fgf11         | fibroblast growth factor 11                                                           | 1.56 |
| 13123  | Cyp7b1        | cytochrome P450, family 7, subfamily b, polypeptide 1                                 | 1.55 |
| 12404  | Cbln1         | cerebellin 1 precursor protein                                                        | 1.55 |
| 252838 | Tox           | thymocyte selection-associated HMG box gene                                           | 1.55 |
| 52538  | Acaa2         | acetyl-Coenzyme A acyltransferase 2 (mitochondrial 3-oxoacyl-Coenzyme A thiolase)     | 1.55 |
| 50701  | Ela2          | elastase 2, neutrophil                                                                | 1.54 |
| 18783  | Pla2g4a       | phospholipase A2, group IVA (cytosolic, calcium-dependent)                            | 1.54 |
| 11861  | Arl4a         | ADP-ribosylation factor-like 4A                                                       | 1.54 |
| 107765 | Ankrd1        | ankyrin repeat domain 1 (cardiac muscle)                                              | 1.53 |
| 13618  | Ednrb         | endothelin receptor type B                                                            | 1.51 |
| 54158  | Copg2as2      | coatomer protein complex, subunit gamma 2, antisense 2                                | 1.5  |
| 14609  | Gja1          | gap junction membrane channel protein alpha 1                                         | 1.5  |
| 13618  | Ednrb         | endothelin receptor type B                                                            | 1.5  |
| 18606  | Enpp2         | ectonucleotide pyrophosphatase/phosphodiesterase 2                                    | 1.49 |
| 51801  | Ramp1         | receptor (calcitonin) activity modifying protein 1                                    | 1.49 |
| 98314  | D2hgdh        | D-2-hydroxyglutarate dehydrogenase                                                    | 1.49 |
| 110595 | Timp4         | tissue inhibitor of metalloproteinase 4                                               | 1.48 |

|        |               |                                                                                            |      |
|--------|---------------|--------------------------------------------------------------------------------------------|------|
| 16882  | Lig3          | ligase III, DNA, ATP-dependent serine (or cysteine) peptidase inhibitor, clade I, member 1 | 1.48 |
| 20713  | Serpini1      |                                                                                            | 1.47 |
| 21928  | Tnfaip2       | tumor necrosis factor, alpha-induced protein 2                                             | 1.46 |
| 13824  | Epb4.1l4a     | erythrocyte protein band 4.1-like 4a                                                       | 1.46 |
| 11464  | Actc1         | actin, alpha, cardiac                                                                      | 1.45 |
| 54712  | Plxnc1        | plexin C1                                                                                  | 1.45 |
| 23871  | Ets1          | E26 avian leukemia oncogene 1, 5' domain                                                   | 1.45 |
| 76219  | 6530401D17Rik | RIKEN cDNA 6530401D17 gene                                                                 | 1.43 |
| 233836 | Slc5a11       | solute carrier family 5 (sodium/glucose cotransporter), member 11                          | 1.43 |
| 14609  | Gja1          | gap junction membrane channel protein alpha 1                                              | 1.43 |
| 171212 | Galnt10       | UDP-N-acetyl-alpha-D-galactosamine:polypeptide N-acetylgalactosaminyltransferase 10        | 1.43 |
| 30800  | Mmp20         | matrix metalloproteinase 20 (enamelysin)                                                   | 1.42 |
| 96935  | Susd4         | sushi domain containing 4                                                                  | 1.42 |
| 53412  | Ppp1r3c       | protein phosphatase 1, regulatory (inhibitor) subunit 3C                                   | 1.42 |
| 12491  | Cd36          | CD36 antigen                                                                               | 1.41 |
| 54611  | Pde3a         | phosphodiesterase 3A, cGMP inhibited                                                       | 1.41 |
| 18526  | Pcdh10        | protocadherin 10                                                                           | 1.4  |
| 22329  | Vcam1         | vascular cell adhesion molecule 1                                                          | 1.4  |
| 22141  | Tub           | tubby candidate gene                                                                       | 1.4  |
| 16181  | Il1rn         | interleukin 1 receptor antagonist                                                          | 1.4  |
| 232670 | Tspan33       | tetraspanin 33                                                                             | 1.4  |
| 232670 | Tspan33       | tetraspanin 33                                                                             | 1.4  |
| 16324  | Inhbb         | inhibin beta-B                                                                             | 1.4  |
| 434002 | -             | -                                                                                          | 1.4  |
| 14609  | Gja1          | gap junction membrane channel protein alpha 1                                              | 1.4  |
| 117149 | Tirap         | toll-interleukin 1 receptor (TIR) domain-containing adaptor protein                        | 1.4  |
| 74185  | Gbe1          | glucan (1,4-alpha-), branching enzyme 1                                                    | 1.39 |
| 12569  | Cdk5r1        | cyclin-dependent kinase 5, regulatory subunit (p35) 1                                      | 1.39 |
| 108653 | 4933426K21Rik | RIKEN cDNA 4933426K21 gene                                                                 | 1.39 |
| 14667  | Gm2a          | GM2 ganglioside activator protein                                                          | 1.39 |
| 11658  | Alcam         | activated leukocyte cell adhesion molecule                                                 | 1.39 |
| 65971  | 1700021K02Rik | RIKEN cDNA 1700021K02 gene                                                                 | 1.38 |
| 109332 | Cdcp1         | CUB domain containing protein 1                                                            | 1.37 |
| 23871  | Ets1          | E26 avian leukemia oncogene 1, 5' domain                                                   | 1.37 |
| 12162  | Bmp7          | bone morphogenetic protein 7                                                               | 1.36 |
| 67685  | Dyx1c1        | dyslexia susceptibility 1 candidate 1 homolog (human)                                      | 1.36 |
| 110596 | Rgnef         | Rho-guanine nucleotide exchange factor                                                     | 1.36 |
| 214359 | Tmem51        | transmembrane protein 51                                                                   | 1.35 |
| 17968  | Ncam2         | neural cell adhesion molecule 2                                                            | 1.35 |
| 14609  | Gja1          | gap junction membrane channel protein alpha 1                                              | 1.35 |
| 110648 | Lmx1a         | LIM homeobox transcription factor 1 alpha                                                  | 1.35 |
| 245555 | C77370        | expressed sequence C77370                                                                  | 1.35 |
| 76219  | 6530401D17Rik | RIKEN cDNA 6530401D17 gene                                                                 | 1.35 |

|        |               |                                                                                                 |      |
|--------|---------------|-------------------------------------------------------------------------------------------------|------|
| 67460  | Decr1         | 2,4-dienoyl CoA reductase 1, mitochondrial coatomer protein complex, subunit gamma 2, antisense | 1.34 |
| 54158  | Copg2as2      | 2                                                                                               | 1.34 |
| 20525  | Slc2a1        | solute carrier family 2 (facilitated glucose transporter), member 1                             | 1.34 |
| 60525  | Acss2         | acyl-CoA synthetase short-chain family member 2                                                 | 1.34 |
| 73284  | Ddit4l        | DNA-damage-inducible transcript 4-like                                                          | 1.33 |
| 20193  | S100a1        | S100 calcium binding protein A1                                                                 | 1.33 |
| 228858 | Gdap11l       | ganglioside-induced differentiation-associated protein 1-like 1                                 | 1.33 |
| 11517  | Adcyap1r1     | adenylate cyclase activating polypeptide 1 receptor 1                                           | 1.32 |
| 66214  | 1190002H23Rik | RIKEN cDNA 1190002H23 gene                                                                      | 1.31 |
| 22427  | Wrn           | Werner syndrome homolog (human)                                                                 | 1.31 |
| 77813  | A930012N16Rik | RIKEN cDNA A930012N16 gene                                                                      | 1.3  |
| 13690  | Eif4g2        | eukaryotic translation initiation factor 4, gamma 2                                             | 1.3  |
| 52538  | Acaa2         | acetyl-Coenzyme A acyltransferase 2 (mitochondrial 3-oxoacyl-Coenzyme A thiolase)               | 1.3  |
| 69634  | Clybl         | citrate lyase beta like                                                                         | 1.29 |
| 72479  | Hsd12         | hydroxysteroid dehydrogenase like 2                                                             | 1.29 |
| 27528  | D0H4S114      | DNA segment, human D4S114                                                                       | 1.29 |
| 103712 | 6330403K07Rik | RIKEN cDNA 6330403K07 gene                                                                      | 1.28 |
| 67310  | Prlpc2        | prolactin-like protein C 2                                                                      | 1.27 |
| 20599  | Smr1          | submaxillary gland androgen regulated protein 1                                                 | 1.27 |
| 53412  | Ppp1r3c       | protein phosphatase 1, regulatory (inhibitor) subunit 3C                                        | 1.26 |
| 103172 | Ndg2          | Nur77 downstream gene 2                                                                         | 1.26 |
| 209558 | Enpp3         | ectonucleotide pyrophosphatase/phosphodiesterase 3                                              | 1.26 |
| 11790  | Speg          | SPEG complex locus                                                                              | 1.25 |
| 17196  | Mbp           | myelin basic protein                                                                            | 1.25 |
| 16832  | Ldhb          | lactate dehydrogenase B                                                                         | 1.25 |
| 56857  | Slc37a2       | solute carrier family 37 (glycerol-3-phosphate transporter), member 2                           | 1.24 |
| 110596 | Rgnef         | Rho-guanine nucleotide exchange factor                                                          | 1.24 |
| 14942  | Gzme          | granzyme E                                                                                      | 1.24 |
| 14972  | H2-K1         | histocompatibility 2, K1, K region                                                              | 1.24 |
| 20962  | Sycp3         | synaptonemal complex protein 3                                                                  | 1.22 |
| 27364  | Srr           | serine racemase                                                                                 | 1.22 |
| 228731 | Nkx2-4        | NK2 transcription factor related, locus 4 (Drosophila)                                          | 1.21 |
| 21827  | Thbs3         | thrombospondin 3                                                                                | 1.21 |
| 13389  | Dll3          | delta-like 3 (Drosophila)                                                                       | 1.21 |
| 67588  | Rnf41         | ring finger protein 41                                                                          | 1.2  |
| 27360  | Add3          | adducin 3 (gamma)                                                                               | 1.2  |
| 14733  | Gpc1          | glypican 1                                                                                      | 1.2  |
| 54393  | Gabbr1        | gamma-aminobutyric acid (GABA-B) receptor, 1                                                    | 1.2  |
| 16419  | Itgb5         | integrin beta 5                                                                                 | 1.2  |
| 14667  | Gm2a          | GM2 ganglioside activator protein                                                               | 1.19 |
| 72479  | Hsd12         | hydroxysteroid dehydrogenase like 2                                                             | 1.19 |
| 66253  | Aig1          | androgen-induced 1                                                                              | 1.19 |
| 27528  | D0H4S114      | DNA segment, human D4S114                                                                       | 1.19 |

|        |               |                                                                                          |      |
|--------|---------------|------------------------------------------------------------------------------------------|------|
| 18751  | Prkcb1        | protein kinase C, beta 1                                                                 | 1.18 |
| 246104 | Rhbdl3        | rhomboid, veinlet-like 3 (Drosophila)                                                    | 1.17 |
| 60525  | Acss2         | acyl-CoA synthetase short-chain family member 2                                          | 1.17 |
| 26357  | Abcg2         | ATP-binding cassette, sub-family G (WHITE), member 2                                     | 1.17 |
| 53611  | Vti1a         | vesicle transport through interaction with t-SNAREs homolog 1A (yeast)                   | 1.17 |
| 66109  | Tspan13       | tetraspanin 13                                                                           | 1.17 |
| 14585  | Gfra1         | glial cell line derived neurotrophic factor family receptor alpha 1                      | 1.16 |
| 54651  | Usp27x        | ubiquitin specific peptidase 27, X chromosome                                            | 1.16 |
| 268595 | D430019H16Rik | RIKEN cDNA D430019H16 gene                                                               | 1.16 |
| 16419  | Itgb5         | integrin beta 5                                                                          | 1.16 |
| 13195  | Ddc           | dopa decarboxylase                                                                       | 1.15 |
| 226778 | Mark1         | MAP/microtubule affinity-regulating kinase 1                                             | 1.15 |
| 243328 | Slc29a4       | solute carrier family 29 (nucleoside transporters), member 4                             | 1.15 |
| 192216 | Tmem47        | transmembrane protein 47                                                                 | 1.14 |
| 19893  | Rpgr          | retinitis pigmentosa GTPase regulator                                                    | 1.14 |
| 66514  | Asrgl1        | asparaginase like 1                                                                      | 1.13 |
| 67307  | 3110049J23Rik | RIKEN cDNA 3110049J23 gene                                                               | 1.13 |
| 16071  | Igk-C         | immunoglobulin kappa chain, constant region                                              | 1.13 |
| 56363  | Tmeff2        | transmembrane protein with EGF-like and two follistatin-like domains 2                   | 1.13 |
| 54613  | St3gal6       | ST3 beta-galactoside alpha-2,3-sialyltransferase 6                                       | 1.13 |
| 110351 | Rap1gap       | Rap1 GTPase-activating protein                                                           | 1.13 |
| 78890  | 2310079F23Rik | RIKEN cDNA 2310079F23 gene                                                               | 1.13 |
| 20525  | Slc2a1        | solute carrier family 2 (facilitated glucose transporter), member 1                      | 1.13 |
| 14169  | Fgf14         | fibroblast growth factor 14                                                              | 1.12 |
| 50918  | Myadm         | myeloid-associated differentiation marker                                                | 1.12 |
| 29858  | Pmm1          | phosphomannomutase 1                                                                     | 1.12 |
| 66995  | Zcchc18       | zinc finger, CCHC domain containing 18                                                   | 1.11 |
| 74352  | Zfp84         | zinc finger protein 84                                                                   | 1.11 |
| 50796  | Dmrt1         | doublesex and mab-3 related transcription factor 1                                       | 1.11 |
| 13852  | Epim          | epimorphin                                                                               | 1.1  |
| 13804  | Endog         | endonuclease G                                                                           | 1.1  |
| 58200  | Ppp1r1a       | protein phosphatase 1, regulatory (inhibitor) subunit 1A                                 | 1.09 |
| 433144 | LOC433144     | similar to thioredoxin-related transmembrane protein 2                                   | 1.09 |
| 27364  | Srr           | serine racemase                                                                          | 1.09 |
| 76566  | 1500005K14Rik | RIKEN cDNA 1500005K14 gene                                                               | 1.08 |
| 13839  | Epha5         | Eph receptor A5                                                                          | 1.08 |
| 16832  | Ldhb          | lactate dehydrogenase B                                                                  | 1.08 |
| 320873 | Cdh10         | cadherin 10                                                                              | 1.08 |
| 66848  | Fuca2         | fucosidase, alpha-L- 2, plasma                                                           | 1.07 |
| 14699  | Gngt1         | guanine nucleotide binding protein (G protein), gamma transducing activity polypeptide 1 | 1.07 |

|        |               |                                                                           |      |
|--------|---------------|---------------------------------------------------------------------------|------|
| 22418  | Wnt5a         | wingless-related MMTV integration site 5A                                 | 1.07 |
| 21817  | Tgm2          | transglutaminase 2, C polypeptide                                         | 1.06 |
| 17035  | Lxn           | latexin                                                                   | 1.06 |
| 19267  | Ptpre         | protein tyrosine phosphatase, receptor type, E                            | 1.06 |
| 20613  | Snai1         | snail homolog 1 (Drosophila)                                              | 1.06 |
| 16658  | Mafb          | v-maf musculoaponeurotic fibrosarcoma oncogene family, protein B (avian)  | 1.06 |
| 20917  | Suc1g2        | succinate-Coenzyme A ligase, GDP-forming, beta subunit                    | 1.06 |
| 68966  | 1500001L15Rik | RIKEN cDNA 1500001L15 gene                                                | 1.05 |
| 56421  | Pfkp          | phosphofructokinase, platelet                                             | 1.05 |
| 20646  | Snrpn         | small nuclear ribonucleoprotein N                                         | 1.05 |
| 17930  | Myom2         | myomesin 2                                                                | 1.04 |
| 69976  | Galk2         | galactokinase 2                                                           | 1.04 |
| 71746  | Rgl3          | ral guanine nucleotide dissociation stimulator-like 3                     | 1.04 |
| 29858  | Pmm1          | phosphomannomutase 1                                                      | 1.04 |
| 14664  | Slc6a9        | solute carrier family 6 (neurotransmitter transporter, glycine), member 9 | 1.04 |
| 19293  | Pvalb         | parvalbumin                                                               | 1.04 |
| 56092  | Cts7          | cathepsin 7                                                               | 1.03 |
| 67564  | Tmem35        | transmembrane protein 35                                                  | 1.03 |
| 13798  | En1           | engrailed 1                                                               | 1.02 |
| 18631  | Pex11a        | peroxisomal biogenesis factor 11a                                         | 1.02 |
| 52552  | Parp8         | poly (ADP-ribose) polymerase family, member 8                             | 1.02 |
| 20404  | Sh3gl2        | SH3-domain GRB2-like 2                                                    | 1.01 |
| 11306  | Abcb7         | ATP-binding cassette, sub-family B (MDR/TAP), member 7                    | 1.01 |
| 67468  | Mmd           | monocyte to macrophage differentiation-associated                         | 1.01 |
| 15550  | Htr1a         | 5-hydroxytryptamine (serotonin) receptor 1A                               | 1.01 |
| 12862  | Cox6a2        | cytochrome c oxidase, subunit VI a, polypeptide 2                         | 1.01 |
| 22619  | Siae          | sialic acid acetyltransferase                                             | 1.01 |
| 16419  | Itgb5         | integrin beta 5                                                           | 1    |
| 74320  | Wdr33         | WD repeat domain 33                                                       | 1    |
| 110751 | Adam33        | a disintegrin and metalloproteinase domain 33                             | 1    |
| 108653 | 4933426K21Rik | RIKEN cDNA 4933426K21 gene                                                | 1    |
| 76223  | Agbl3         | ATP/GTP binding protein-like 3                                            | 0.99 |
| 225845 | Hrasls3       | HRAS like suppressor 3                                                    | 0.99 |
| 24001  | Tiam2         | T-cell lymphoma invasion and metastasis 2                                 | 0.99 |
| 110595 | Timp4         | tissue inhibitor of metalloproteinase 4                                   | 0.99 |
| 20686  | Spa17         | sperm autoantigenic protein 17                                            | 0.98 |
| 69833  | Polr2f        | polymerase (RNA) II (DNA directed) polypeptide F                          | 0.98 |
| 67252  | Cap2          | CAP, adenylate cyclase-associated protein, 2 (yeast)                      | 0.98 |
| 114874 | Ddhd1         | DDHD domain containing 1                                                  | 0.98 |
| 80892  | Zfhx4         | zinc finger homeodomain 4                                                 | 0.97 |
| 68736  | 1110034B05Rik | RIKEN cDNA 1110034B05 gene                                                | 0.96 |
| 75541  | 1700019G17Rik | RIKEN cDNA 1700019G17 gene                                                | 0.96 |
| 14658  | Glr1b         | glycine receptor, beta subunit                                            | 0.96 |

|        |               |                                                                                 |      |
|--------|---------------|---------------------------------------------------------------------------------|------|
| 11705  | Amh           | anti-Mullerian hormone                                                          | 0.95 |
| 232969 | 2410005H09Rik | RIKEN cDNA 2410005H09 gene                                                      | 0.95 |
| 11803  | Aplp1         | amyloid beta (A4) precursor-like protein 1                                      | 0.95 |
| 76884  | Cyfp2         | cytoplasmic FMR1 interacting protein 2                                          | 0.94 |
| 67468  | Mmd           | monocyte to macrophage differentiation-associated                               | 0.94 |
| 107094 | AA408556      | expressed sequence AA408556                                                     | 0.94 |
| 27360  | Add3          | adducin 3 (gamma)                                                               | 0.94 |
| 14275  | Folr1         | folate receptor 1 (adult)                                                       | 0.94 |
| 22700  | Zfp40         | zinc finger protein 40                                                          | 0.93 |
| 16832  | Ldhd          | lactate dehydrogenase B                                                         | 0.93 |
| 15132  | Hbb-bh1       | hemoglobin Z, beta-like embryonic chain                                         | 0.92 |
| 12176  | Bnip3         | BCL2/adenovirus E1B interacting protein 1, NIP3                                 | 0.92 |
| 72930  | Ppp2r2b       | protein phosphatase 2 (formerly 2A), regulatory subunit B (PR 52), beta isoform | 0.92 |
| 110959 | Nudt19        | nudix (nucleoside diphosphate linked moiety X)-type motif 19                    | 0.92 |
| 12491  | Cd36          | CD36 antigen                                                                    | 0.92 |
| 14961  | H2-Ab1        | histocompatibility 2, class II antigen A, beta 1                                | 0.91 |
| 20312  | Cx3cl1        | chemokine (C-X3-C motif) ligand 1                                               | 0.91 |
| 56043  | Akr1e1        | aldo-keto reductase family 1, member E1                                         | 0.91 |
| 66152  | 1110020P15Rik | RIKEN cDNA 1110020P15 gene                                                      | 0.91 |
| 234593 | Ndr4          | N-myc downstream regulated gene 4                                               | 0.91 |
| 20679  | Sox6          | SRY-box containing gene 6                                                       | 0.9  |
| 16424  | Itih1         | inter-alpha trypsin inhibitor, heavy chain 1                                    | 0.9  |
| 77219  | Zadh1         | zinc binding alcohol dehydrogenase, domain containing 1                         | 0.9  |
| 57339  | Jph1          | junctionophilin 1                                                               | 0.9  |
| 14609  | Gja1          | gap junction membrane channel protein alpha 1                                   | 0.9  |
| 56295  | Higd1a        | HIG1 domain family, member 1A                                                   | 0.9  |
| 212862 | Chpt1         | choline phosphotransferase 1                                                    | 0.89 |
| 66514  | Asrgl1        | asparaginase like 1                                                             | 0.89 |
| 26757  | Dpysl4        | dihydropyrimidinase-like 4                                                      | 0.89 |
| 21802  | Tgfa          | transforming growth factor alpha                                                | 0.89 |
| 67015  | Ccdc91        | coiled-coil domain containing 91                                                | 0.89 |
| 320262 | A830073O21Rik | RIKEN cDNA A830073O21 gene                                                      | 0.88 |
| 192663 | Abcg4         | ATP-binding cassette, sub-family G (WHITE), member 4                            | 0.88 |
| 13110  | Cyp2j6        | cytochrome P450, family 2, subfamily j, polypeptide 6                           | 0.88 |
| 66098  | Chchd6        | coiled-coil-helix-coiled-coil-helix domain containing 6                         | 0.88 |
| 77219  | Zadh1         | zinc binding alcohol dehydrogenase, domain containing 1                         | 0.88 |
| 15110  | Hand1         | heart and neural crest derivatives expressed transcript 1                       | 0.88 |
| 11758  | Prdx6         | peroxiredoxin 6                                                                 | 0.88 |
| 51789  | Tnk2          | tyrosine kinase, non-receptor, 2                                                | 0.88 |
| 67126  | Atp5e         | ATP synthase, H+ transporting, mitochondrial F1 complex, epsilon subunit        | 0.87 |
| 106931 | Kctd1         | potassium channel tetramerisation domain containing 1                           | 0.87 |
| 14783  | Grb10         | growth factor receptor bound protein 10                                         | 0.86 |
| 18645  | Pfn2          | profilin 2                                                                      | 0.86 |

|        |               |                                                                                                                                      |      |
|--------|---------------|--------------------------------------------------------------------------------------------------------------------------------------|------|
| 26947  | Tuba-rs1      | tubulin alpha, related sequence 1                                                                                                    | 0.86 |
| 56376  | Pdlim5        | PDZ and LIM domain 5                                                                                                                 | 0.86 |
| 76142  | Ppp1r14c      | protein phosphatase 1, regulatory (inhibitor) subunit 14c                                                                            | 0.86 |
| 14166  | Fgf11         | fibroblast growth factor 11                                                                                                          | 0.86 |
| 98366  | Smap1         | stromal membrane-associated protein 1                                                                                                | 0.85 |
| 30938  | Fgd3          | FYVE, RhoGEF and PH domain containing 3                                                                                              | 0.85 |
| 17873  | Gadd45b       | growth arrest and DNA-damage-inducible 45 beta                                                                                       | 0.85 |
| 11517  | Adcyap1r1     | adenylate cyclase activating polypeptide 1 receptor 1                                                                                | 0.85 |
| 52197  | DXErtD223e    | DNA segment, Chr X, ERATO Doi 223, expressed                                                                                         | 0.85 |
| 76892  | 0610013E23Rik | RIKEN cDNA 0610013E23 gene                                                                                                           | 0.85 |
| 12569  | Cdk5r1        | cyclin-dependent kinase 5, regulatory subunit (p35) 1                                                                                | 0.84 |
| 320802 | 6330512M04Rik | RIKEN cDNA 6330512M04 gene                                                                                                           | 0.84 |
| 50496  | E2f6          | E2F transcription factor 6                                                                                                           | 0.84 |
| 12889  | Cplx1         | complexin 1                                                                                                                          | 0.83 |
| 71911  | Bdh1          | 3-hydroxybutyrate dehydrogenase, type 1                                                                                              | 0.83 |
| 99586  | Dpyd          | dihydropyrimidine dehydrogenase                                                                                                      | 0.83 |
| 17268  | Meis1         | myeloid ecotropic viral integration site 1                                                                                           | 0.83 |
| 29820  | Tnfrsf19      | tumor necrosis factor receptor superfamily, member 19                                                                                | 0.83 |
| 246196 | Zfp277        | zinc finger protein 277                                                                                                              | 0.83 |
| 17161  | Maoa          | monoamine oxidase A                                                                                                                  | 0.82 |
| 77809  | Lrrc42        | leucine rich repeat containing 42                                                                                                    | 0.82 |
| 16832  | Ldhb          | lactate dehydrogenase B                                                                                                              | 0.82 |
| 231086 | Hadhb         | hydroxyacyl-Coenzyme A dehydrogenase/3-ketoacyl-Coenzyme A thiolase/enoyl-Coenzyme A hydratase (trifunctional protein), beta subunit | 0.82 |
| 67914  | Coq9          | coenzyme Q9 homolog (yeast)                                                                                                          | 0.81 |
| 66832  | Rshl2         | radial spokehead-like 2                                                                                                              | 0.81 |
| 14609  | Gja1          | gap junction membrane channel protein alpha 1                                                                                        | 0.8  |
| 93692  | Glrx          | glutaredoxin                                                                                                                         | 0.8  |
| 76816  | Sdccag8       | serologically defined colon cancer antigen 8                                                                                         | 0.8  |
| 12183  | Bpgm          | 2,3-bisphosphoglycerate mutase                                                                                                       | 0.8  |
| 20531  | Slc34a2       | solute carrier family 34 (sodium phosphate), member 2                                                                                | 0.8  |
| 21859  | Timp3         | tissue inhibitor of metalloproteinase 3                                                                                              | 0.8  |
| 16922  | Phyh          | phytanoyl-CoA hydroxylase                                                                                                            | 0.8  |
| 83382  | Siglece       | sialic acid binding Ig-like lectin E                                                                                                 | 0.8  |
| 54375  | Azin1         | antizyme inhibitor 1                                                                                                                 | 0.8  |
| 12183  | Bpgm          | 2,3-bisphosphoglycerate mutase                                                                                                       | 0.8  |
| 66454  | Nmnat1        | nicotinamide nucleotide adenylyltransferase 1                                                                                        | 0.8  |
| 56046  | 2410003P15Rik | RIKEN cDNA 2410003P15 gene                                                                                                           | 0.79 |
| 26462  | Txnrd2        | thioredoxin reductase 2                                                                                                              | 0.79 |
| 13131  | Dab1          | disabled homolog 1 (Drosophila)                                                                                                      | 0.79 |
| 16865  | Lgtn          | ligatin                                                                                                                              | 0.78 |
| 20404  | Sh3gl2        | SH3-domain GRB2-like 2                                                                                                               | 0.78 |
| 18645  | Pfn2          | profilin 2                                                                                                                           | 0.78 |
| 109232 | Sccpdh        | saccharopine dehydrogenase (putative)                                                                                                | 0.78 |
| 94180  | Acsbg1        | acyl-CoA synthetase bubblegum family member 1                                                                                        | 0.78 |



|        |               |                                                                                |      |
|--------|---------------|--------------------------------------------------------------------------------|------|
| 11429  | Aco2          | aconitase 2, mitochondrial                                                     | 0.78 |
| 217473 | Ankmy2        | ankyrin repeat and MYND domain containing 2                                    | 0.78 |
| 67414  | Mfn1          | mitofusin 1                                                                    | 0.78 |
| 20525  | Slc2a1        | solute carrier family 2 (facilitated glucose transporter), member 1            | 0.78 |
| 54326  | Elovl2        | elongation of very long chain fatty acids (FEN1/Elo2, SUR4/Elo3, yeast)-like 2 | 0.77 |
| 13202  | Ddt           | D-dopachrome tautomerase                                                       | 0.77 |
| 72157  | Pgm2          | phosphoglucomutase 2                                                           | 0.76 |
| 67451  | Pkp2          | plakophilin 2                                                                  | 0.76 |
| 71777  | Ing3          | inhibitor of growth family, member 3                                           | 0.76 |
| 66154  | Tmem14c       | transmembrane protein 14C                                                      | 0.76 |
| 27053  | Asns          | asparagine synthetase                                                          | 0.75 |
| 20745  | Spock1        | sparc/osteonectin, cwcv and kazal-like domains proteoglycan 1                  | 0.75 |
| 69487  | 2310003L22Rik | RIKEN cDNA 2310003L22 gene                                                     | 0.75 |
| 108653 | 4933426K21Rik | RIKEN cDNA 4933426K21 gene                                                     | 0.75 |
| 217082 | Hlf           | hepatic leukemia factor                                                        | 0.75 |
| 93692  | Glrx          | glutaredoxin                                                                   | 0.75 |
| 27357  | Gyg           | glycogenin                                                                     | 0.74 |
| 27053  | Asns          | asparagine synthetase                                                          | 0.74 |
| 18645  | Pfn2          | profilin 2                                                                     | 0.74 |
| 13685  | Eif4ebp1      | eukaryotic translation initiation factor 4E binding protein 1                  | 0.74 |
| 21991  | Tpi1          | triosephosphate isomerase 1                                                    | 0.74 |
| 65111  | Dap3          | death associated protein 3                                                     | 0.73 |
| 67062  | 2810402A17Rik | RIKEN cDNA 2810402A17 gene                                                     | 0.73 |
| 76483  | 2400010G15Rik | RIKEN cDNA 2400010G15 gene                                                     | 0.73 |
| 105439 | 9630044O09Rik | RIKEN cDNA 9630044O09 gene                                                     | 0.73 |
| 14088  | Fancc         | Fanconi anemia, complementation group C                                        | 0.73 |
| 208715 | Hmgcs1        | 3-hydroxy-3-methylglutaryl-Coenzyme A synthase 1                               | 0.73 |
| 29813  | Zfp385        | zinc finger protein 385                                                        | 0.73 |
| 66388  | Cutc          | cutC copper transporter homolog (E.coli)                                       | 0.73 |
| 13528  | Dtnb          | dystrobrevin, beta                                                             | 0.73 |
| 20482  | Skil          | SKI-like                                                                       | 0.72 |
| 11306  | Abcb7         | ATP-binding cassette, sub-family B (MDR/TAP), member 7                         | 0.72 |
| 72938  | 2900042B11Rik | RIKEN cDNA 2900042B11 gene                                                     | 0.72 |
| 66514  | Asrgl1        | asparaginase like 1                                                            | 0.72 |
| 28080  | Atp5o         | ATP synthase, H <sup>+</sup> transporting, mitochondrial F1 complex, O subunit | 0.72 |
| 16081  | Igk-V1        | immunoglobulin kappa chain variable 1 (V1)                                     | 0.72 |
| 68077  | Gltscr2       | glioma tumor suppressor candidate region gene 2                                | 0.72 |
| 17762  | Mapt          | microtubule-associated protein tau                                             | 0.72 |
| 16206  | Lrig1         | leucine-rich repeats and immunoglobulin-like domains 1                         | 0.72 |

|        |               |                                                                                                                                      |      |
|--------|---------------|--------------------------------------------------------------------------------------------------------------------------------------|------|
| 231086 | Hadhb         | hydroxyacyl-Coenzyme A dehydrogenase/3-ketoacyl-Coenzyme A thiolase/enoyl-Coenzyme A hydratase (trifunctional protein), beta subunit | 0.72 |
| 171212 | Galnt10       | UDP-N-acetyl-alpha-D-galactosamine:polypeptide N-acetylgalactosaminyltransferase 10                                                  | 0.71 |
| 67122  | Nrarp         | Notch-regulated ankyrin repeat protein                                                                                               | 0.71 |
| 12568  | Cdk5          | cyclin-dependent kinase 5                                                                                                            | 0.71 |
| 19092  | Prkg2         | protein kinase, cGMP-dependent, type II                                                                                              | 0.71 |
| 20744  | Strbp         | spermatid perinuclear RNA binding protein                                                                                            | 0.71 |
| 66958  | Txndc14       | thioredoxin domain containing 14                                                                                                     | 0.71 |
| 22151  | Tubb2a        | tubulin, beta 2a                                                                                                                     | 0.7  |
| 110855 | Pde6c         | phosphodiesterase 6C, cGMP specific, cone, alpha prime                                                                               | 0.7  |
| 14719  | Got2          | glutamate oxaloacetate transaminase 2, mitochondrial                                                                                 | 0.7  |
| 67059  | 2810409H07Rik | RIKEN cDNA 2810409H07 gene                                                                                                           | 0.7  |
| 12265  | C2ta          | class II transactivator                                                                                                              | 0.7  |
| 18415  | Hspa4l        | heat shock protein 4 like                                                                                                            | 0.7  |
| 83603  | Elovl4        | elongation of very long chain fatty acids (FEN1/Elo2, SUR4/Elo3, yeast)-like 4                                                       | 0.7  |
| 16865  | Lgtn          | ligatin                                                                                                                              | 0.7  |
| 68241  | 9530058B02Rik | RIKEN cDNA 9530058B02 gene                                                                                                           | 0.7  |
| 233046 | Rasgrp4       | RAS guanyl releasing protein 4                                                                                                       | 0.7  |
| 75778  | Them4         | thioesterase superfamily member 4                                                                                                    | 0.69 |
| 24056  | Sh3bp5        | SH3-domain binding protein 5 (BTK-associated)                                                                                        | 0.69 |
| 110446 | Acat1         | acetyl-Coenzyme A acetyltransferase 1                                                                                                | 0.69 |
| 110446 | Acat1         | acetyl-Coenzyme A acetyltransferase 1                                                                                                | 0.69 |
| 15107  | Hadhsc        | L-3-hydroxyacyl-Coenzyme A dehydrogenase, short chain                                                                                | 0.69 |
| 12183  | Bpgm          | 2,3-bisphosphoglycerate mutase                                                                                                       | 0.69 |
| 15962  | Ifna1         | interferon alpha family, gene 1                                                                                                      | 0.69 |
| 17527  | Mpv17         | Mpv17 transgene, kidney disease mutant                                                                                               | 0.68 |
| 68157  | 6720475J19Rik | RIKEN cDNA 6720475J19 gene                                                                                                           | 0.68 |
| 98388  | Chst10        | carbohydrate sulfotransferase 10                                                                                                     | 0.68 |
| 14066  | F3            | coagulation factor III                                                                                                               | 0.68 |
| 15926  | Idh1          | isocitrate dehydrogenase 1 (NADP+), soluble                                                                                          | 0.68 |
| 229487 | Pet112l       | PET112-like (yeast)                                                                                                                  | 0.68 |
| 73873  | 4930430E16Rik | RIKEN cDNA 4930430E16 gene                                                                                                           | 0.68 |
| 109552 | Sri           | sorcin                                                                                                                               | 0.68 |
| 68121  | Cep70         | centrosomal protein 70                                                                                                               | 0.68 |
| 93757  | Imp2l         | IMP2 inner mitochondrial membrane peptidase-like (S. cerevisiae)                                                                     | 0.68 |
| 56335  | Mettl3        | methyltransferase-like 3                                                                                                             | 0.67 |
| 56046  | 2410003P15Rik | RIKEN cDNA 2410003P15 gene                                                                                                           | 0.67 |
| 56376  | Pdlim5        | PDZ and LIM domain 5                                                                                                                 | 0.67 |
| 77697  | Mmab          | methylmalonic aciduria (cobalamin deficiency) type B homolog (human)                                                                 | 0.67 |

|        |               |                                                                                         |      |
|--------|---------------|-----------------------------------------------------------------------------------------|------|
| 74008  | Arsg          | arylsulfatase G                                                                         | 0.67 |
| 57279  | Slc25a20      | solute carrier family 25 (mitochondrial carnitine/acylcarnitine translocase), member 20 | 0.67 |
| 66152  | 1110020P15Rik | RIKEN cDNA 1110020P15 gene                                                              | 0.67 |
| 18616  | Peg3          | paternally expressed 3                                                                  | 0.67 |
| 13382  | Dld           | dihydrolipoamide dehydrogenase                                                          | 0.66 |
| 319625 | Galm          | galactose mutarotase                                                                    | 0.66 |
| 13405  | Dmd           | dystrophin, muscular dystrophy                                                          | 0.66 |
| 107797 | V1rb6         | vomeronasal 1 receptor, B6                                                              | 0.66 |
| 27660  | 1700088E04Rik | RIKEN cDNA 1700088E04 gene                                                              | 0.66 |
| 96957  | Tmem62        | transmembrane protein 62                                                                | 0.66 |
| 73102  | 3110004L20Rik | RIKEN cDNA 3110004L20 gene                                                              | 0.66 |
| 66108  | Ndufa9        | NADH dehydrogenase (ubiquinone) 1 alpha subcomplex, 9                                   | 0.66 |
| 217473 | Ankmy2        | ankyrin repeat and MYND domain containing 2                                             | 0.66 |
| 16195  | Il6st         | interleukin 6 signal transducer                                                         | 0.66 |
| 208836 | BC025462      | cDNA sequence BC025462                                                                  | 0.65 |
| 16419  | Itgb5         | integrin beta 5                                                                         | 0.65 |
| 15926  | Idh1          | isocitrate dehydrogenase 1 (NADP+), soluble                                             | 0.65 |
| 110532 | Adarb1        | adenosine deaminase, RNA-specific, B1                                                   | 0.65 |
| 211550 | T2bp          | Traf2 binding protein                                                                   | 0.65 |
| 27389  | Dusp13        | dual specificity phosphatase 13                                                         | 0.65 |
| 232536 | Mrps35        | mitochondrial ribosomal protein S35                                                     | 0.65 |
| 12896  | Cpt2          | carnitine palmitoyltransferase 2                                                        | 0.65 |
| 57443  | Fbxo3         | F-box only protein 3                                                                    | 0.64 |
| 70358  | Steap1        | six transmembrane epithelial antigen of the prostate 1                                  | 0.64 |
| 18631  | Pex11a        | peroxisomal biogenesis factor 11a                                                       | 0.64 |
| 76338  | Rab2b         | RAB2B, member RAS oncogene family                                                       | 0.64 |
| 67523  | 1700094J05Rik | RIKEN cDNA 1700094J05 gene                                                              | 0.64 |
| 70911  | Phyhipl       | phytanoyl-CoA hydroxylase interacting protein-like                                      | 0.64 |
| 110842 | Etfa          | electron transferring flavoprotein, alpha polypeptide                                   | 0.64 |
| 18016  | Nf2           | neurofibromatosis 2                                                                     | 0.64 |
| 57279  | Slc25a20      | solute carrier family 25 (mitochondrial carnitine/acylcarnitine translocase), member 20 | 0.64 |
| 18134  | Nova1         | neuro-oncological ventral antigen 1                                                     | 0.64 |
| 20501  | Slc16a1       | solute carrier family 16 (monocarboxylic acid transporters), member 1                   | 0.63 |
| 67216  | Mboat2        | membrane bound O-acyltransferase domain containing 2                                    | 0.63 |
| 11363  | Acadl         | acyl-Coenzyme A dehydrogenase, long-chain                                               | 0.63 |
| 19171  | Psmb10        | proteasome (prosome, macropain) subunit, beta type 10                                   | 0.63 |
| 66075  | Chchd3        | coiled-coil-helix-coiled-coil-helix domain containing 3                                 | 0.63 |
| 68145  | 5730466H23Rik | RIKEN cDNA 5730466H23 gene                                                              | 0.63 |
| 18744  | Pja1          | praja1, RING-H2 motif containing                                                        | 0.63 |
| 77219  | Zadh1         | zinc binding alcohol dehydrogenase, domain containing 1                                 | 0.63 |

|        |               |                                                                                                       |      |
|--------|---------------|-------------------------------------------------------------------------------------------------------|------|
| 212531 | Sh3bgrl2      | SH3 domain binding glutamic acid-rich protein like 2                                                  | 0.63 |
| 11899  | Astn1         | astrotactin 1                                                                                         | 0.63 |
| 210029 | Metrn1        | meteorin, glial cell differentiation regulator-like                                                   | 0.62 |
| 234258 | Neil3         | nei like 3 (E. coli)                                                                                  | 0.62 |
| 114874 | Ddhd1         | DDHD domain containing 1                                                                              | 0.62 |
| 106572 | Rab31         | RAB31, member RAS oncogene family                                                                     | 0.62 |
| 20656  | Sod2          | superoxide dismutase 2, mitochondrial                                                                 | 0.62 |
| 170461 | Stard6        | StAR-related lipid transfer (START) domain containing 6                                               | 0.62 |
| 69981  | Tmem30a       | transmembrane protein 30A                                                                             | 0.61 |
| 212862 | Chpt1         | choline phosphotransferase 1                                                                          | 0.61 |
| 56298  | Arl6ip2       | ADP-ribosylation factor-like 6 interacting protein 2                                                  | 0.61 |
| 20970  | Sdc3          | syndecan 3                                                                                            | 0.61 |
| 66736  | 4921531G14Rik | RIKEN cDNA 4921531G14 gene                                                                            | 0.61 |
| 15925  | Ide           | insulin degrading enzyme                                                                              | 0.61 |
| 11810  | Apobec1       | apolipoprotein B editing complex 1                                                                    | 0.61 |
| 14460  | Gata1         | GATA binding protein 1                                                                                | 0.61 |
| 433594 | LOC433594     | phosphoglycerate kinase 1-like                                                                        | 0.61 |
| 19878  | Rock2         | Rho-associated coiled-coil containing protein kinase 2                                                | 0.61 |
| 12419  | Cbx5          | chromobox homolog 5 (Drosophila HP1a)                                                                 | 0.61 |
| 110446 | Acat1         | acetyl-Coenzyme A acetyltransferase 1                                                                 | 0.6  |
| 100637 | B230342M21Rik | RIKEN cDNA B230342M21 gene                                                                            | 0.6  |
| 18744  | Pja1          | praja1, RING-H2 motif containing                                                                      | 0.6  |
| 67636  | 4930469P12Rik | RIKEN cDNA 4930469P12 gene                                                                            | 0.6  |
| 68349  | Ndufs3        | NADH dehydrogenase (ubiquinone) Fe-S protein 3                                                        | 0.6  |
| 67238  | 2810453I06Rik | RIKEN cDNA 2810453I06 gene                                                                            | 0.6  |
| 17174  | Masp1         | mannan-binding lectin serine peptidase 1                                                              | 0.6  |
| 76123  | Gpsm2         | G-protein signalling modulator 2 (AGS3-like, C. elegans)                                              | 0.59 |
| 17448  | Mdh2          | malate dehydrogenase 2, NAD (mitochondrial)                                                           | 0.59 |
| 67942  | Atp5g2        | ATP synthase, H <sup>+</sup> transporting, mitochondrial F0 complex, subunit c (subunit 9), isoform 2 | 0.59 |
| 67013  | Oma1          | OMA1 homolog, zinc metallopeptidase (S. cerevisiae)                                                   | 0.59 |
| 66052  | Sdhc          | succinate dehydrogenase complex, subunit C, integral membrane protein                                 | 0.59 |
| 19201  | Pstpip2       | proline-serine-threonine phosphatase-interacting protein 2                                            | 0.59 |
| 229709 | Ahcyl1        | S-adenosylhomocysteine hydrolase-like 1                                                               | 0.59 |
| 66925  | Sdhd          | succinate dehydrogenase complex, subunit D, integral membrane protein                                 | 0.58 |
| 59056  | Evc           | Ellis van Creveld gene homolog (human)                                                                | 0.58 |
| 217779 | Lysmd1        | LysM, putative peptidoglycan-binding, domain containing 1                                             | 0.58 |
| 56376  | Pdlim5        | PDZ and LIM domain 5                                                                                  | 0.58 |
| 27878  | Tada1l        | transcriptional adaptor 1 (HF11 homolog, yeast) like                                                  | 0.58 |
| 18105  | Nqo2          | NAD(P)H dehydrogenase, quinone 2                                                                      | 0.58 |
| 66361  | Zfand1        | zinc finger, AN1-type domain 1                                                                        | 0.58 |
| 27364  | Srr           | serine racemase                                                                                       | 0.58 |

|        |               |                                                                                                                              |      |
|--------|---------------|------------------------------------------------------------------------------------------------------------------------------|------|
| 69692  | Hddc2         | HD domain containing 2                                                                                                       | 0.58 |
| 22038  | Plscr1        | phospholipid scramblase 1                                                                                                    | 0.58 |
| 11740  | Slc25a5       | solute carrier family 25 (mitochondrial carrier, adenine nucleotide translocator), member 5                                  | 0.57 |
| 12478  | Cd19          | CD19 antigen                                                                                                                 | 0.57 |
| 108760 | Galnt1        | UDP-N-acetyl-alpha-D-galactosamine:polypeptide N-acetylgalactosaminyltransferase-like 1                                      | 0.57 |
| 69009  | Thap7         | THAP domain containing 7                                                                                                     | 0.57 |
| 11739  | Slc25a4       | solute carrier family 25 (mitochondrial carrier, adenine nucleotide translocator), member 4                                  | 0.57 |
| 56018  | Stard10       | START domain containing 10                                                                                                   | 0.57 |
| 21807  | Tsc22d1       | TSC22 domain family, member 1                                                                                                | 0.57 |
| 67003  | Uqcrc2        | ubiquinol cytochrome c reductase core protein 2                                                                              | 0.57 |
| 12850  | Coq7          | demethyl-Q 7                                                                                                                 | 0.57 |
| 319974 | Auts2         | autism susceptibility candidate 2                                                                                            | 0.57 |
| 208715 | Hmgcs1        | 3-hydroxy-3-methylglutaryl-Coenzyme A synthase 1                                                                             | 0.57 |
| 11740  | Slc25a5       | solute carrier family 25 (mitochondrial carrier, adenine nucleotide translocator), member 5                                  | 0.57 |
| 66359  | 2310005N03Rik | RIKEN cDNA 2310005N03 gene                                                                                                   | 0.57 |
| 28080  | Atp5o         | ATP synthase, H <sup>+</sup> transporting, mitochondrial F1 complex, O subunit                                               | 0.57 |
| 229709 | Ahcy1         | S-adenosylhomocysteine hydrolase-like 1                                                                                      | 0.56 |
| 17918  | Myo5a         | myosin Va                                                                                                                    | 0.56 |
| 66594  | Uqcr          | ubiquinol-cytochrome c reductase (6.4kD) subunit                                                                             | 0.56 |
| 76051  | Ganc          | glucosidase, alpha; neutral C                                                                                                | 0.56 |
| 11429  | Aco2          | aconitase 2, mitochondrial                                                                                                   | 0.56 |
| 72865  | Cxx1c         | CAAX box 1 homolog C (human)                                                                                                 | 0.56 |
| 225115 | Svil          | supervillin                                                                                                                  | 0.56 |
| 15107  | Hadhsc        | L-3-hydroxyacyl-Coenzyme A dehydrogenase, short chain                                                                        | 0.56 |
| 13804  | Endog         | endonuclease G                                                                                                               | 0.56 |
| 66291  | 1810030N24Rik | RIKEN cDNA 1810030N24 gene                                                                                                   | 0.56 |
| 14735  | Gpc4          | glypican 4                                                                                                                   | 0.55 |
| 56695  | Pnkd          | paroxysmal nonkinesinogenic dyskinesia regulator of chromosome condensation (RCC1) and BTB (POZ) domain containing protein 1 | 0.55 |
| 71330  | Rcbtb1        | cytochrome c-1                                                                                                               | 0.55 |
| 66445  | Cyc1          | cytochrome c-1                                                                                                               | 0.55 |
| 77559  | Agl           | amylo-1,6-glucosidase, 4-alpha-glucanotransferase                                                                            | 0.55 |
| 14972  | H2-K1         | histocompatibility 2, K1, K region                                                                                           | 0.55 |
| 11740  | Slc25a5       | solute carrier family 25 (mitochondrial carrier, adenine nucleotide translocator), member 5                                  | 0.55 |
| 108000 | Cenpf         | centromere protein F                                                                                                         | 0.55 |
| 12858  | Cox5a         | cytochrome c oxidase, subunit Va                                                                                             | 0.55 |
| 270624 | 9630042H07Rik | RIKEN cDNA 9630042H07 gene                                                                                                   | 0.55 |
| 230027 | Coq3          | coenzyme Q3 homolog, methyltransferase (yeast)                                                                               | 0.54 |
| 11949  | Atp5c1        | ATP synthase, H <sup>+</sup> transporting, mitochondrial F1 complex, gamma polypeptide 1                                     | 0.54 |

|        |               |                                                                                                               |      |
|--------|---------------|---------------------------------------------------------------------------------------------------------------|------|
| 433771 | 2310028O11Rik | RIKEN cDNA 2310028O11 gene                                                                                    | 0.54 |
| 16886  | Limk2         | LIM motif-containing protein kinase 2                                                                         | 0.54 |
| 52822  | Rufy3         | RUN and FYVE domain containing 3                                                                              | 0.54 |
| 11890  | Asgr2         | asialoglycoprotein receptor 2                                                                                 | 0.54 |
| 22418  | Wnt5a         | wingless-related MMTV integration site 5A                                                                     | 0.54 |
| 67212  | Mrpl55        | mitochondrial ribosomal protein L55                                                                           | 0.54 |
| 18597  | Pdha1         | pyruvate dehydrogenase E1 alpha 1                                                                             | 0.54 |
| 66477  | Usmg5         | upregulated during skeletal muscle growth 5                                                                   | 0.54 |
| 14252  | Flot2         | flotillin 2                                                                                                   | 0.54 |
| 59125  | Nek7          | NIMA (never in mitosis gene a)-related expressed kinase 7                                                     | 0.54 |
| 217473 | Ankmy2        | ankyrin repeat and MYND domain containing 2                                                                   | 0.53 |
| 104010 | Cdh22         | cadherin 22                                                                                                   | 0.53 |
| 66109  | Tspan13       | tetraspanin 13                                                                                                | 0.53 |
| 66273  | 1810020D17Rik | RIKEN cDNA 1810020D17 gene                                                                                    | 0.53 |
| 14467  | Gbas          | glioblastoma amplified sequence                                                                               | 0.53 |
| 105014 | Rdh14         | retinol dehydrogenase 14 (all-trans and 9-cis)                                                                | 0.53 |
| 54483  | Mefv          | Mediterranean fever                                                                                           | 0.53 |
| 14788  | Gpr162        | G protein-coupled receptor 162                                                                                | 0.53 |
| 57874  | Ptplad1       | protein tyrosine phosphatase-like A domain containing 1                                                       | 0.53 |
| 11950  | Atp5f1        | ATP synthase, H <sup>+</sup> transporting, mitochondrial F0 complex, subunit b, isoform 1                     | 0.53 |
| 66531  | 2310061C15Rik | RIKEN cDNA 2310061C15 gene                                                                                    | 0.53 |
| 69527  | Mrps9         | mitochondrial ribosomal protein S9                                                                            | 0.53 |
| 11740  | Slc25a5       | solute carrier family 25 (mitochondrial carrier, adenine nucleotide translocator), member 5                   | 0.52 |
| 18708  | Pik3r1        | phosphatidylinositol 3-kinase, regulatory subunit, polypeptide 1 (p85 alpha)                                  | 0.52 |
| 12568  | Cdk5          | cyclin-dependent kinase 5                                                                                     | 0.52 |
| 106572 | Rab31         | RAB31, member RAS oncogene family                                                                             | 0.52 |
| 11950  | Atp5f1        | ATP synthase, H <sup>+</sup> transporting, mitochondrial F0 complex, subunit b, isoform 1                     | 0.52 |
| 225887 | Ndufs8        | NADH dehydrogenase (ubiquinone) Fe-S protein 8 pre-B-cell leukemia transcription factor interacting protein 1 | 0.52 |
| 229534 | Pbxip1        | ATP synthase, H <sup>+</sup> transporting, mitochondrial F1 complex, alpha subunit, isoform 1                 | 0.52 |
| 11946  | Atp5a1        | ATP synthase, H <sup>+</sup> transporting, mitochondrial F1 complex, alpha subunit, isoform 1                 | 0.52 |
| 67122  | Nrarp         | Notch-regulated ankyrin repeat protein                                                                        | 0.52 |
| 56451  | Suclg1        | succinate-CoA ligase, GDP-forming, alpha subunit                                                              | 0.52 |
| 26370  | Cetn2         | centrin 2                                                                                                     | 0.52 |
| 52906  | Ahi1          | Abelson helper integration site                                                                               | 0.51 |
| 67414  | Mfn1          | mitofusin 1                                                                                                   | 0.51 |
| 11841  | Arf2          | ADP-ribosylation factor 2                                                                                     | 0.51 |
| 66046  | Ndufb5        | NADH dehydrogenase (ubiquinone) 1 beta subcomplex, 5                                                          | 0.51 |
| 103743 | Tmem98        | transmembrane protein 98                                                                                      | 0.51 |
| 260299 | Igsf4c        | immunoglobulin superfamily, member 4C                                                                         | 0.51 |
| 18719  | Pip5k1a       | phosphatidylinositol-4-phosphate 5-kinase, type 1 alpha                                                       | 0.51 |

|        |               |                                                                                                                   |      |
|--------|---------------|-------------------------------------------------------------------------------------------------------------------|------|
| 107371 | Exoc6         | exocyst complex component 6                                                                                       | 0.51 |
| 114896 | Afg3l1        | AFG3(ATPase family gene 3)-like 1 (yeast)                                                                         | 0.51 |
| 68034  | 2900009I07Rik | RIKEN cDNA 2900009I07 gene                                                                                        | 0.51 |
| 67036  | Mrpl45        | mitochondrial ribosomal protein L45                                                                               | 0.51 |
| 76155  | 6330509M23Rik | RIKEN cDNA 6330509M23 gene                                                                                        | 0.51 |
| 58243  | Nap1l5        | nucleosome assembly protein 1-like 5                                                                              | 0.51 |
| 546103 | -             | -                                                                                                                 | 0.51 |
| 105675 | Ppif          | peptidylprolyl isomerase F (cyclophilin F)<br>solute carrier family 22 (organic cation transporter),<br>member 17 | 0.5  |
| 59049  | Slc22a17      |                                                                                                                   | 0.5  |
| 12419  | Cbx5          | chromobox homolog 5 (Drosophila HP1a)                                                                             | 0.5  |
| 56736  | Rnf14         | ring finger protein 14                                                                                            | 0.5  |
| 15929  | Idh3g         | isocitrate dehydrogenase 3 (NAD+), gamma                                                                          | 0.5  |
| 14007  | Cugbp2        | CUG triplet repeat, RNA binding protein 2                                                                         | 0.5  |
| 17762  | Mapt          | microtubule-associated protein tau<br>NADH dehydrogenase (ubiquinone) 1 alpha subcomplex<br>10                    | 0.5  |
| 67273  | Ndufa10       |                                                                                                                   | 0.5  |
| 234796 | BC025816      | cDNA sequence BC025816                                                                                            | 0.5  |
| 225887 | Ndufs8        | NADH dehydrogenase (ubiquinone) Fe-S protein 8                                                                    | 0.5  |
| 217082 | Hlf           | hepatic leukemia factor                                                                                           | 0.5  |
| 70791  | Harsl         | histidyl-tRNA synthetase-like                                                                                     | 0.49 |
| 72129  | Pex13         | peroxisomal biogenesis factor 13                                                                                  | 0.49 |
| 18611  | Pea15         | phosphoprotein enriched in astrocytes 15                                                                          | 0.49 |
| 227707 | BC005624      | cDNA sequence BC005624                                                                                            | 0.49 |
| 268566 | Gphn          | gephyrin                                                                                                          | 0.49 |
| 11674  | Aldoa         | aldolase 1, A isoform                                                                                             | 0.49 |
| 67530  | Uqcrb         | ubiquinol-cytochrome c reductase binding protein                                                                  | 0.49 |
| 66423  | 2410022L05Rik | RIKEN cDNA 2410022L05 gene                                                                                        | 0.49 |
| 17920  | Myo6          | myosin VI                                                                                                         | 0.49 |
| 224481 | Tfb1m         | transcription factor B1, mitochondrial<br>succinate dehydrogenase complex, subunit A,<br>flavoprotein (Fp)        | 0.48 |
| 66945  | Sdha          |                                                                                                                   | 0.48 |
| 17252  | Rdh11         | retinol dehydrogenase 11                                                                                          | 0.48 |
| 18611  | Pea15         | phosphoprotein enriched in astrocytes 15                                                                          | 0.48 |
| 65973  | Asph          | aspartate-beta-hydroxylase                                                                                        | 0.48 |
| 68728  | Trp53inp2     | tumor protein p53 inducible nuclear protein 2                                                                     | 0.48 |
| 227960 | Gca           | granulosa cell protein 1                                                                                          | 0.48 |
| 94063  | Mrpl16        | mitochondrial ribosomal protein L16                                                                               | 0.48 |
| 66641  | 5730470L24Rik | RIKEN cDNA 5730470L24 gene                                                                                        | 0.47 |
| 66894  | Wwp2          | WW domain containing E3 ubiquitin protein ligase 2                                                                | 0.47 |
| 66818  | 9130011J15Rik | RIKEN cDNA 9130011J15 gene<br>succinate dehydrogenase complex, subunit B, iron sulfur<br>(Ip)                     | 0.47 |
| 67680  | Sdhb          |                                                                                                                   | 0.47 |
| 14433  | LOC14433      | similar to glyceraldehyde-3-phosphate dehydrogenase                                                               | 0.47 |
| 17995  | Ndufv1        | NADH dehydrogenase (ubiquinone) flavoprotein 1                                                                    | 0.47 |

|        |               |                                                                                                       |      |
|--------|---------------|-------------------------------------------------------------------------------------------------------|------|
| 117109 | Pop5          | processing of precursor 5, ribonuclease P/MRP family (S. cerevisiae)                                  | 0.47 |
| 57316  | C1d           | nuclear DNA binding protein                                                                           | 0.47 |
| 12868  | Cox8a         | cytochrome c oxidase, subunit VIIIa                                                                   | 0.47 |
| 223978 | C530044N13Rik | RIKEN cDNA C530044N13 gene                                                                            | 0.47 |
| 66377  | Ndufc1        | NADH dehydrogenase (ubiquinone) 1, subcomplex unknown, 1                                              | 0.47 |
| 11416  | Slc33a1       | solute carrier family 33 (acetyl-CoA transporter), member 1                                           | 0.46 |
| 66694  | Uqcrcs1       | ubiquinol-cytochrome c reductase, Rieske iron-sulfur polypeptide 1                                    | 0.46 |
| 70561  | 5730420B22Rik | RIKEN cDNA 5730420B22 gene                                                                            | 0.46 |
| 23797  | Akt3          | thymoma viral proto-oncogene 3                                                                        | 0.46 |
| 66414  | Ndufa12       | NADH dehydrogenase (ubiquinone) 1 alpha subcomplex, 12                                                | 0.46 |
| 12419  | Cbx5          | chromobox homolog 5 (Drosophila HP1a)                                                                 | 0.46 |
| 14297  | Fxn           | frataxin                                                                                              | 0.46 |
| 12531  | Cdc25b        | cell division cycle 25 homolog B (S. cerevisiae)                                                      | 0.46 |
| 18016  | Nf2           | neurofibromatosis 2                                                                                   | 0.46 |
| 224454 | Zdhhc14       | zinc finger, DHHC domain containing 14                                                                | 0.46 |
| 170718 | Idh3b         | isocitrate dehydrogenase 3 (NAD+) beta DNA segment, Chr 10, University of California at Los Angeles 1 | 0.46 |
| 28193  | D10Ucla1      | similar to glyceraldehyde-3-phosphate dehydrogenase                                                   | 0.46 |
| 14433  | LOC14433      | ubiquinol-cytochrome c reductase hinge protein                                                        | 0.45 |
| 66576  | Uqcrc         | DNA binding protein with his-thr domain                                                               | 0.45 |
| 20749  | Dbp1          |                                                                                                       |      |
| 52683  | D15Ertd785e   | DNA segment, Chr 15, ERATO Doi 785, expressed                                                         | 0.45 |
| 66286  | Sec11I3       | Sec11-like 3 (S. cerevisiae)                                                                          | 0.45 |
| 15574  | Hus1          | Hus1 homolog (S. pombe)                                                                               | 0.45 |
| 52665  | Echdc1        | enoyl Coenzyme A hydratase domain containing 1                                                        | 0.45 |
| 71706  | 1200006F02Rik | RIKEN cDNA 1200006F02 gene                                                                            | 0.45 |
| 66789  | Alg14         | asparagine-linked glycosylation 14 homolog (yeast)                                                    | 0.45 |
| 72857  | 2900006A08Rik | RIKEN cDNA 2900006A08 gene                                                                            | 0.45 |
| 18648  | Pgam1         | phosphoglycerate mutase 1                                                                             | 0.45 |
| 71927  | Itfg1         | integrin alpha FG-GAP repeat containing 1                                                             | 0.45 |
| 224008 | 2310008H04Rik | RIKEN cDNA 2310008H04 gene                                                                            | 0.45 |
| 75430  | 3200002M19Rik | RIKEN cDNA 3200002M19 gene                                                                            | 0.45 |
| 76238  | Grhpr         | glyoxylate reductase/hydroxypyruvate reductase                                                        | 0.44 |
| 239706 | BC024814      | cDNA sequence BC024814                                                                                | 0.44 |
| 229211 | Acad9         | acyl-Coenzyme A dehydrogenase family, member 9                                                        | 0.44 |
| 67532  | Mfap1         | microfibrillar-associated protein 1                                                                   | 0.44 |
| 66218  | Ndufb9        | NADH dehydrogenase (ubiquinone) 1 beta subcomplex, 9                                                  | 0.44 |
| 12868  | Cox8a         | cytochrome c oxidase, subunit VIIIa                                                                   | 0.44 |
| 18212  | Ntrk2         | neurotrophic tyrosine kinase, receptor, type 2                                                        | 0.44 |



|        |               |                                                                                                                                      |      |
|--------|---------------|--------------------------------------------------------------------------------------------------------------------------------------|------|
| 59057  | Zfp191        | zinc finger protein 191                                                                                                              | 0.44 |
| 74257  | Tspan17       | tetraspanin 17                                                                                                                       | 0.44 |
| 14154  | Fem1a         | feminization 1 homolog a (C. elegans)                                                                                                | 0.44 |
| 54525  | Syt7          | synaptotagmin VII                                                                                                                    | 0.44 |
| 76467  | Msrb2         | methionine sulfoxide reductase B2                                                                                                    | 0.44 |
| 22365  | Vps45         | vacuolar protein sorting 45 (yeast)                                                                                                  | 0.43 |
| 67063  | 2810432L12Rik | RIKEN cDNA 2810432L12 gene                                                                                                           | 0.43 |
| 192166 | Sardh         | sarcosine dehydrogenase                                                                                                              | 0.43 |
| 66307  | Isoc1         | isochorismatase domain containing 1                                                                                                  | 0.43 |
| 57246  | Tbx20         | T-box 20                                                                                                                             | 0.43 |
| 17449  | Mdh1          | malate dehydrogenase 1, NAD (soluble)                                                                                                | 0.43 |
| 27057  | Ncoa4         | nuclear receptor coactivator 4                                                                                                       | 0.43 |
| 67532  | Mfap1         | microfibrillar-associated protein 1                                                                                                  | 0.43 |
| 226849 | Ppp2r5a       | protein phosphatase 2, regulatory subunit B (B56), alpha isoform                                                                     | 0.43 |
| 23821  | Bace1         | beta-site APP cleaving enzyme 1                                                                                                      | 0.43 |
| 81535  | Sgpp1         | sphingosine-1-phosphate phosphatase 1                                                                                                | 0.43 |
| 73739  | Pgea1         | PKD2 interactor, golgi and endoplasmic reticulum associated 1                                                                        | 0.43 |
| 19883  | Rora          | RAR-related orphan receptor alpha                                                                                                    | 0.42 |
| 75734  | 5230400G24Rik | RIKEN cDNA 5230400G24 gene                                                                                                           | 0.42 |
| 72003  | Synpr         | synaptoporin                                                                                                                         | 0.42 |
| 72900  | Ndufv2        | NADH dehydrogenase (ubiquinone) flavoprotein 2                                                                                       | 0.42 |
| 22361  | Vnn1          | vanin 1                                                                                                                              | 0.42 |
| 11946  | Atp5a1        | ATP synthase, H <sup>+</sup> transporting, mitochondrial F1 complex, alpha subunit, isoform 1                                        | 0.42 |
| 66082  | Abhd6         | abhydrolase domain containing 6                                                                                                      | 0.42 |
| 226162 | 5330431N19Rik | RIKEN cDNA 5330431N19 gene                                                                                                           | 0.42 |
| 11818  | ApoH          | apolipoprotein H                                                                                                                     | 0.42 |
| 71354  | Wdr31         | WD repeat domain 31                                                                                                                  | 0.42 |
| 22017  | Tpmt          | thiopurine methyltransferase                                                                                                         | 0.42 |
| 12858  | Cox5a         | cytochrome c oxidase, subunit Va                                                                                                     | 0.42 |
| 56297  | Arl6          | ADP-ribosylation factor-like 6                                                                                                       | 0.41 |
| 170755 | Sgk3          | serum/glucocorticoid regulated kinase 3                                                                                              | 0.41 |
| 14433  | LOC14433      | similar to glyceraldehyde-3-phosphate dehydrogenase dihydrolipoamide S-succinyltransferase (E2 component of 2-oxo-glutarate complex) | 0.41 |
| 78920  | Dlst          | cDNA sequence BC010311                                                                                                               | 0.41 |
| 209212 | BC010311      | succinate dehydrogenase complex, subunit A, flavoprotein (Fp)                                                                        | 0.41 |
| 66945  | Sdha          | ATP synthase, H <sup>+</sup> transporting, mitochondrial F0 complex, subunit f, isoform 2                                            | 0.41 |
| 57423  | Atp5j2        | ATP synthase, H <sup>+</sup> transporting, mitochondrial F0 complex, subunit f, isoform 2                                            | 0.41 |
| 11732  | Ank           | progressive ankylosis                                                                                                                | 0.41 |
| 27425  | Atp5l         | ATP synthase, H <sup>+</sup> transporting, mitochondrial F0 complex, subunit g                                                       | 0.41 |
| 52717  | D10Ertd641e   | DNA segment, Chr 10, ERATO Doi 641, expressed                                                                                        | 0.41 |
| 216558 | Ugp2          | UDP-glucose pyrophosphorylase 2                                                                                                      | 0.41 |

|        |               |                                                                                                                    |      |
|--------|---------------|--------------------------------------------------------------------------------------------------------------------|------|
| 19655  | Rbmx          | RNA binding motif protein, X chromosome                                                                            | 0.41 |
| 19272  | Ptprk         | protein tyrosine phosphatase, receptor type, K                                                                     | 0.4  |
| 67144  | Lrrc40        | leucine rich repeat containing 40                                                                                  | 0.4  |
| 212862 | Chpt1         | choline phosphotransferase 1                                                                                       | 0.4  |
| 11739  | Slc25a4       | solute carrier family 25 (mitochondrial carrier, adenine nucleotide translocator), member 4                        | 0.4  |
| 407785 | Ndufs6        | NADH dehydrogenase (ubiquinone) Fe-S protein 6                                                                     | 0.4  |
| 19299  | Abcd3         | ATP-binding cassette, sub-family D (ALD), member 3                                                                 | 0.4  |
| 140488 | Igf2bp3       | insulin-like growth factor 2 mRNA binding protein 3                                                                | 0.4  |
| 27368  | Tbl2          | transducin (beta)-like 2                                                                                           | 0.39 |
| 67997  | Ddx59         | DEAD (Asp-Glu-Ala-Asp) box polypeptide 59                                                                          | 0.39 |
| 12858  | Cox5a         | cytochrome c oxidase, subunit Va                                                                                   | 0.39 |
| 24056  | Sh3bp5        | SH3-domain binding protein 5 (BTK-associated)                                                                      | 0.39 |
| 69804  | Tmem147       | transmembrane protein 147                                                                                          | 0.39 |
| 66073  | Txndc12       | thioredoxin domain containing 12 (endoplasmic reticulum)                                                           | 0.39 |
| 21945  | Dedd          | death effector domain-containing                                                                                   | 0.39 |
| 68327  | 0610007P22Rik | RIKEN cDNA 0610007P22 gene                                                                                         | 0.39 |
| 18791  | Plat          | plasminogen activator, tissue                                                                                      | 0.39 |
| 66140  | 1110001A07Rik | RIKEN cDNA 1110001A07 gene                                                                                         | 0.39 |
| 22422  | Wnt7b         | wingless-related MMTV integration site 7B                                                                          | 0.39 |
| 22217  | Usp12         | ubiquitin specific peptidase 12                                                                                    | 0.39 |
| 76614  | Immt          | inner membrane protein, mitochondrial                                                                              | 0.39 |
| 15929  | Idh3g         | isocitrate dehydrogenase 3 (NAD+), gamma                                                                           | 0.39 |
| 66520  | 2610001J05Rik | RIKEN cDNA 2610001J05 gene                                                                                         | 0.38 |
| 24071  | Synj2bp       | synaptojanin 2 binding protein                                                                                     | 0.38 |
| 70223  | Nars          | asparaginyl-tRNA synthetase                                                                                        | 0.38 |
| 109778 | Blvra         | biliverdin reductase A                                                                                             | 0.38 |
| 50529  | Mrps7         | mitochondrial ribosomal protein S7                                                                                 | 0.38 |
| 116940 | Ncoa6ip       | nuclear receptor coactivator 6 interacting protein                                                                 | 0.38 |
| 64933  | Ap3m2         | adaptor-related protein complex 3, mu 2 subunit                                                                    | 0.38 |
| 71799  | Ptcd1         | pentatricopeptide repeat domain 1                                                                                  | 0.38 |
| 17918  | Myo5a         | myosin Va                                                                                                          | 0.38 |
| 72844  | Kctd17        | potassium channel tetramerisation domain containing 17                                                             | 0.38 |
| 14289  | Fpr-rs2       | formyl peptide receptor, related sequence 2                                                                        | 0.38 |
| 66307  | Isoc1         | isochorismatase domain containing 1                                                                                | 0.38 |
| 52064  | Coq5          | coenzyme Q5 homolog, methyltransferase (yeast)                                                                     | 0.38 |
| 13929  | X83328        | EST X83328                                                                                                         | 0.38 |
| 66398  | Commd5        | COMM domain containing 5                                                                                           | 0.37 |
| 72981  | Prkrir        | protein-kinase, interferon-inducible double stranded RNA dependent inhibitor, repressor of (P58 repressor)         | 0.37 |
| 11370  | Acadvl        | acyl-Coenzyme A dehydrogenase, very long chain sorting and assembly machinery component 50 homolog (S. cerevisiae) | 0.37 |
| 68653  | Samm50        | (S. cerevisiae)                                                                                                    | 0.37 |
| 12864  | Cox6c         | cytochrome c oxidase, subunit VIc                                                                                  | 0.37 |
| 69882  | 2010321M09Rik | RIKEN cDNA 2010321M09 gene                                                                                         | 0.37 |
| 15108  | Hadh2         | hydroxyacyl-Coenzyme A dehydrogenase type II                                                                       | 0.37 |

|        |               |                                                                                                               |      |
|--------|---------------|---------------------------------------------------------------------------------------------------------------|------|
| 24131  | Ldb3          | LIM domain binding 3                                                                                          | 0.37 |
| 11740  | Slc25a5       | solute carrier family 25 (mitochondrial carrier, adenine nucleotide translocator), member 5                   | 0.36 |
| 212285 | Centd1        | centaurin, delta 1                                                                                            | 0.36 |
| 67942  | Atp5g2        | ATP synthase, H <sup>+</sup> transporting, mitochondrial F0 complex, subunit c (subunit 9), isoform 2         | 0.36 |
| 13175  | Dcamk11       | double cortin and calcium/calmodulin-dependent protein kinase-like 1                                          | 0.36 |
| 17765  | Mtf2          | metal response element binding transcription factor 2                                                         | 0.36 |
| 76223  | Agbl3         | ATP/GTP binding protein-like 3                                                                                | 0.36 |
| 20598  | Smpd2         | sphingomyelin phosphodiesterase 2, neutral                                                                    | 0.36 |
| 57785  | 2400006H24Rik | RIKEN cDNA 2400006H24 gene                                                                                    | 0.36 |
| 67921  | Ube2f         | ubiquitin-conjugating enzyme E2F (putative)                                                                   | 0.36 |
| 23827  | Bpnt1         | bisphosphate 3'-nucleotidase 1                                                                                | 0.36 |
| 107817 | Ptdsr         | phosphatidylserine receptor                                                                                   | 0.36 |
| 18016  | Nf2           | neurofibromatosis 2                                                                                           | 0.36 |
| 22222  | Ubr1          | ubiquitin protein ligase E3 component n-recognin 1                                                            | 0.35 |
| 71116  | Stx18         | syntaxin 18                                                                                                   | 0.35 |
| 108667 | 6330549H03Rik | RIKEN cDNA 6330549H03 gene                                                                                    | 0.35 |
| 17434  | Mocs2         | molybdenum cofactor synthesis 2                                                                               | 0.35 |
| 58520  | 0610007P14Rik | RIKEN cDNA 0610007P14 gene                                                                                    | 0.35 |
| 56196  | Ttrap         | Traf and Tnf receptor associated protein                                                                      | 0.35 |
| 56382  | Rab9          | RAB9, member RAS oncogene family                                                                              | 0.35 |
| 12033  | Bcap29        | B-cell receptor-associated protein 29                                                                         | 0.35 |
| 17995  | Ndufv1        | NADH dehydrogenase (ubiquinone) flavoprotein 1 v-ral simian leukemia viral oncogene homolog B (ras related)   | 0.35 |
| 64143  | Ralb          |                                                                                                               | 0.35 |
| 269423 | 3110057O12Rik | RIKEN cDNA 3110057O12 gene                                                                                    | 0.35 |
| 70380  | Mospd1        | motile sperm domain containing 1                                                                              | 0.35 |
| 76252  | Atp6v0e2      | ATPase, H <sup>+</sup> transporting, lysosomal V0 subunit E2                                                  | 0.35 |
| 19691  | Recql         | RecQ protein-like                                                                                             | 0.34 |
| 76890  | 0610016J10Rik | RIKEN cDNA 0610016J10 gene                                                                                    | 0.34 |
| 67247  | Mosc2         | MOCO sulphurase C-terminal domain containing 2                                                                | 0.34 |
| 68795  | 1110059H15Rik | RIKEN cDNA 1110059H15 gene                                                                                    | 0.34 |
| 19277  | Ptpro         | protein tyrosine phosphatase, receptor type, O Rfad1, flavin adenine dinucleotide synthetase, homolog (yeast) | 0.34 |
| 319945 | Flad1         |                                                                                                               | 0.34 |
| 20129  | Rptn          | repetin                                                                                                       | 0.34 |
| 110379 | Sec13l1       | SEC13-like 1 ( <i>S. cerevisiae</i> )                                                                         | 0.34 |
| 110323 | Cox6b1        | cytochrome c oxidase, subunit VIb polypeptide 1                                                               | 0.33 |
| 11957  | Atp5j         | ATP synthase, H <sup>+</sup> transporting, mitochondrial F0 complex, subunit F                                | 0.33 |
| 11740  | Slc25a5       | solute carrier family 25 (mitochondrial carrier, adenine nucleotide translocator), member 5                   | 0.33 |
| 170755 | Sgk3          | serum/glucocorticoid regulated kinase 3                                                                       | 0.33 |

|        |               |                                                                                                           |      |
|--------|---------------|-----------------------------------------------------------------------------------------------------------|------|
| 19718  | Rfc2          | replication factor C (activator 1) 2                                                                      | 0.33 |
| 11740  | Slc25a5       | solute carrier family 25 (mitochondrial carrier, adenine nucleotide translocator), member 5               | 0.33 |
| 56282  | Mrpl12        | mitochondrial ribosomal protein L12                                                                       | 0.33 |
| 57440  | Ehd3          | EH-domain containing 3                                                                                    | 0.33 |
| 14319  | Fth1          | ferritin heavy chain 1                                                                                    | 0.33 |
| 67811  | Poldip2       | polymerase (DNA-directed), delta interacting protein 2                                                    | 0.33 |
| 50753  | Fbxo8         | F-box only protein 8                                                                                      | 0.33 |
| 66194  | Pycl          | pyrroline-5-carboxylate reductase-like                                                                    | 0.33 |
| 12859  | Cox5b         | cytochrome c oxidase, subunit Vb                                                                          | 0.33 |
| 72621  | Pdzd11        | PDZ domain containing 11                                                                                  | 0.32 |
| 66599  | Rdm1          | RAD52 motif 1                                                                                             | 0.32 |
| 226139 | Cox15         | COX15 homolog, cytochrome c oxidase assembly protein (yeast)                                              | 0.32 |
| 73024  | 2900064A13Rik | RIKEN cDNA 2900064A13 gene                                                                                | 0.32 |
| 66921  | Prpf38b       | PRP38 pre-mRNA processing factor 38 (yeast) domain containing B                                           | 0.32 |
| 53605  | Nap111        | nucleosome assembly protein 1-like 1                                                                      | 0.32 |
| 19085  | Prkar1b       | protein kinase, cAMP dependent regulatory, type I beta                                                    | 0.32 |
| 22646  | Zfp105        | zinc finger protein 105                                                                                   | 0.31 |
| 20440  | St6gal1       | beta galactoside alpha 2,6 sialyltransferase 1                                                            | 0.31 |
| 15369  | Hmox2         | heme oxygenase (decycling) 2                                                                              | 0.31 |
| 58875  | Hibadh        | 3-hydroxyisobutyrate dehydrogenase                                                                        | 0.31 |
| 27643  | Ubl4          | ubiquitin-like 4                                                                                          | 0.31 |
| 229801 | Tram111       | translocation associated membrane protein 1-like 1                                                        | 0.31 |
| 11739  | Slc25a4       | solute carrier family 25 (mitochondrial carrier, adenine nucleotide translocator), member 4               | 0.31 |
| 216873 | Spag7         | sperm associated antigen 7                                                                                | 0.3  |
| 18203  | Ntan1         | N-terminal Asn amidase                                                                                    | 0.3  |
| 56807  | Scamp5        | secretory carrier membrane protein 5                                                                      | 0.3  |
| 80286  | Tusc3         | tumor suppressor candidate 3                                                                              | 0.3  |
| 56428  | Mtch2         | mitochondrial carrier homolog 2 (C. elegans)                                                              | 0.3  |
| 105675 | Ppif          | peptidylprolyl isomerase F (cyclophilin F)                                                                | 0.3  |
| 73078  | Pmpcb         | peptidase (mitochondrial processing) beta signaling intermediate in Toll pathway-evolutionarily conserved | 0.3  |
| 26940  | Sitpec        |                                                                                                           | 0.3  |
| 67657  | Rabl3         | RAB, member of RAS oncogene family-like 3                                                                 | 0.3  |
| 216724 | Rufy1         | RUN and FYVE domain containing 1                                                                          | 0.3  |
| 52840  | Dbn2          | dysbindin (dystrobrevin binding protein 1) domain containing 2                                            | 0.29 |
| 68572  | Ict1          | immature colon carcinoma transcript 1                                                                     | 0.29 |
| 22166  | Txn1          | thioredoxin 1                                                                                             | 0.29 |
| 64051  | Sv2a          | synaptic vesicle glycoprotein 2 a                                                                         | 0.29 |
| 67019  | Actr6         | ARP6 actin-related protein 6 homolog (yeast)                                                              | 0.29 |
| 66916  | Ndufb7        | NADH dehydrogenase (ubiquinone) 1 beta subcomplex, 7                                                      | 0.29 |
| 19302  | Pxmp3         | peroxisomal membrane protein 3                                                                            | 0.29 |
| 54388  | Hils1         | histone H1-like protein in spermatids 1                                                                   | 0.29 |
| 71891  | Cdad1         | cytidine and dCMP deaminase domain containing 1                                                           | 0.28 |
| 12725  | Cln3          | chloride channel 3                                                                                        | 0.28 |

|        |               |                                                                                                                   |      |
|--------|---------------|-------------------------------------------------------------------------------------------------------------------|------|
| 66656  | Eef1d         | eukaryotic translation elongation factor 1 delta (guanine nucleotide exchange protein)                            | 0.28 |
| 66818  | 9130011J15Rik | RIKEN cDNA 9130011J15 gene                                                                                        | 0.28 |
| 72114  | Zbed3         | zinc finger, BED domain containing 3                                                                              | 0.28 |
| 68276  | Toe1          | target of EGR1, member 1 (nuclear)                                                                                | 0.28 |
| 70208  | Crsp3         | cofactor required for Sp1 transcriptional activation, subunit 3                                                   | 0.28 |
| 16601  | Klf9          | Kruppel-like factor 9                                                                                             | 0.27 |
| 319615 | 6330416L07Rik | RIKEN cDNA 6330416L07 gene                                                                                        | 0.27 |
| 192166 | Sardh         | sarcosine dehydrogenase                                                                                           | 0.27 |
| 11364  | Acadm         | acyl-Coenzyme A dehydrogenase, medium chain                                                                       | 0.27 |
| 68385  | Tlcd1         | TLC domain containing 1                                                                                           | 0.27 |
| 53621  | Cnot4         | CCR4-NOT transcription complex, subunit 4                                                                         | 0.27 |
| 12866  | Cox7a2        | cytochrome c oxidase, subunit VIIa 2                                                                              | 0.27 |
| 64291  | Osbp1a        | oxysterol binding protein-like 1A                                                                                 | 0.26 |
| 18655  | Pgk1          | phosphoglycerate kinase 1                                                                                         | 0.26 |
| 230279 | 6330416G13Rik | RIKEN cDNA 6330416G13 gene                                                                                        | 0.26 |
| 70103  | Znhit1        | zinc finger, HIT domain containing 1                                                                              | 0.26 |
| 66592  | Stoml2        | stomatin (Epb7.2)-like 2                                                                                          | 0.26 |
| 68117  | 9430083G14Rik | RIKEN cDNA 9430083G14 gene                                                                                        | 0.26 |
| 231464 | Cnot6l        | CCR4-NOT transcription complex, subunit 6-like                                                                    | 0.25 |
| 76793  | Snip1         | Smad nuclear interacting protein 1                                                                                | 0.25 |
| 16886  | Limk2         | LIM motif-containing protein kinase 2                                                                             | 0.25 |
| 26398  | Map2k4        | mitogen activated protein kinase kinase 4                                                                         | 0.25 |
| 77721  | Mrps5         | mitochondrial ribosomal protein S5                                                                                | 0.25 |
| 67509  | 1810063B07Rik | RIKEN cDNA 1810063B07 gene                                                                                        | 0.25 |
| 58875  | Hibadh        | 3-hydroxyisobutyrate dehydrogenase                                                                                | 0.25 |
| 223527 | Eny2          | enhancer of yellow 2 homolog (Drosophila)                                                                         | 0.25 |
| 103850 | Nt5m          | 5',3'-nucleotidase, mitochondrial                                                                                 | 0.24 |
| 52717  | D10Ertd641e   | DNA segment, Chr 10, ERATO Doi 641, expressed sorting and assembly machinery component 50 homolog (S. cerevisiae) | 0.24 |
| 68653  | Samm50        | (S. cerevisiae)                                                                                                   | 0.24 |
| 18679  | Phka1         | phosphorylase kinase alpha 1                                                                                      | 0.24 |
| 104130 | Ndufb11       | NADH dehydrogenase (ubiquinone) 1 beta subcomplex, 11                                                             | 0.24 |
| 70103  | Znhit1        | zinc finger, HIT domain containing 1                                                                              | 0.24 |
| 50755  | Fbxo18        | F-box protein 18                                                                                                  | 0.24 |
| 13430  | Dnm2          | dynamamin 2                                                                                                       | 0.23 |
| 20333  | Sec22b        | SEC22 vesicle trafficking protein homolog B (S. cerevisiae)                                                       | 0.23 |
| 67979  | Atad1         | ATPase family, AAA domain containing 1                                                                            | 0.23 |
| 228033 | Atp5g3        | ATP synthase, H+ transporting, mitochondrial F0 complex, subunit c (subunit 9), isoform 3                         | 0.23 |
| 12068  | Bet1          | blocked early in transport 1 homolog (S. cerevisiae)                                                              | 0.23 |
| 98053  | Gtf2f1        | general transcription factor IIF, polypeptide 1                                                                   | 0.23 |

|        |               |                                                                                               |      |
|--------|---------------|-----------------------------------------------------------------------------------------------|------|
| 68611  | Mrpl28        | mitochondrial ribosomal protein L28                                                           | 0.23 |
| 20022  | Polr2j        | polymerase (RNA) II (DNA directed) polypeptide J                                              | 0.23 |
| 23917  | Impdh1        | inosine 5'-phosphate dehydrogenase 1                                                          | 0.22 |
| 216821 | Tmem11        | transmembrane protein 11                                                                      | 0.21 |
| 17955  | Nap1l4        | nucleosome assembly protein 1-like 4                                                          | 0.2  |
| 81703  | Jundm2        | Jun dimerization protein 2                                                                    | 0.2  |
| 56248  | Ak3           | adenylate kinase 3                                                                            | 0.2  |
| 12861  | Cox6a1        | cytochrome c oxidase, subunit VI a, polypeptide 1                                             | 0.2  |
| 236604 | 4933439C20Rik | RIKEN cDNA 4933439C20 gene                                                                    | 0.2  |
| 16592  | Fabp5         | fatty acid binding protein 5, epidermal                                                       | 0.2  |
| 68332  | 0610010E21Rik | RIKEN cDNA 0610010E21 gene                                                                    | 0.19 |
| 67881  | 1810034K20Rik | RIKEN cDNA 1810034K20 gene                                                                    | 0.19 |
| 28075  | D15Wsu75e     | DNA segment, Chr 15, Wayne State University 75, expressed                                     | 0.19 |
| 94353  | Hmgn3         | high mobility group nucleosomal binding domain 3                                              | 0.19 |
| 65102  | Nif3l1        | Ngg1 interacting factor 3-like 1 (S. pombe)                                                   | 0.19 |
| 66071  | Ethe1         | ethylmalonic encephalopathy 1                                                                 | 0.19 |
| 66861  | Dnajc10       | DnaJ (Hsp40) homolog, subfamily C, member 10                                                  | 0.19 |
| 67530  | Uqcrb         | ubiquinol-cytochrome c reductase binding protein                                              | 0.18 |
| 12140  | Fabp7         | fatty acid binding protein 7, brain                                                           | 0.18 |
| 72736  | Txndc1        | thioredoxin domain containing 1                                                               | 0.18 |
| 76338  | Rab2b         | RAB2B, member RAS oncogene family                                                             | 0.17 |
| 227743 | Mapkap1       | mitogen-activated protein kinase associated protein 1                                         | 0.17 |
| 66521  | Rwdd1         | RWD domain containing 1                                                                       | 0.17 |
| 28295  | D10Jhu81e     | DNA segment, Chr 10, Johns Hopkins University 81 expressed                                    | 0.17 |
| 69976  | Galk2         | galactokinase 2                                                                               | 0.16 |
| 56417  | Adar          | adenosine deaminase, RNA-specific                                                             | 0.16 |
| 76281  | Tax1bp3       | Tax1 (human T-cell leukemia virus type I) binding protein 3                                   | 0.16 |
| 83679  | Pde4dip       | phosphodiesterase 4D interacting protein (myomegalin)                                         | 0.16 |
| 28084  | Vps25         | vacuolar protein sorting 25 (yeast)                                                           | 0.15 |
| 19775  | Xpr1          | xenotropic and polytropic retrovirus receptor 1                                               | 0.15 |
| 20656  | Sod2          | superoxide dismutase 2, mitochondrial                                                         | 0.15 |
| 22697  | Zipro1        | zinc finger proliferation 1                                                                   | 0.15 |
| 78935  | Saal1         | serum amyloid A-like 1                                                                        | 0.14 |
| 109232 | Sccpdh        | saccharopine dehydrogenase (putative)                                                         | 0.14 |
| 20751  | Spr           | sepiapterin reductase                                                                         | 0.14 |
| 231600 | Chfr          | checkpoint with forkhead and ring finger domains                                              | 0.13 |
| 74316  | Hbld1         | HESB like domain containing 1                                                                 | 0.13 |
| 66460  | 2610042O14Rik | RIKEN cDNA 2610042O14 gene                                                                    | 0.13 |
| 66168  | Grina         | glutamate receptor, ionotropic, N-methyl D-aspartate-associated protein 1 (glutamate binding) | 0.12 |
| 69080  | Gmppa         | GDP-mannose pyrophosphorylase A                                                               | 0.1  |
| 12283  | Cab39         | calcium binding protein 39                                                                    | 0.09 |
| 22186  | Uba52         | ubiquitin A-52 residue ribosomal protein fusion product 1                                     | 0.07 |

**Supplemental Table 2.** Summary of probe sets repressed in Olig-2 null neurospheres relative to wild-type neurospheres. The genes present on this list have an decreased level of expression relative to wild type neurospheres – the fold change is reported as the log (base 2) of the difference. See Figure 6 for methods.

**Supplemental Table 3. E-box Enriched Genes with Upregulated Expression in Olig2 KO vs. WT NSC**

| Gene ID | Gene Symbol   | Gene Name                                                       | Average Fold Change (log2) |
|---------|---------------|-----------------------------------------------------------------|----------------------------|
| 58807   | Slco1c1       | Solute carrier organic anion transporter family, member 1c1     | 5.04                       |
| 57811   | Rgr           | Retinal G protein coupled receptor                              | 4.19                       |
| 22417   | Wnt4          | Wingless-related MMTV integration site 4                        | 4.04                       |
| 18159   | Nppc          | Natriuretic peptide precursor type C                            | 3.79                       |
| 70839   | P2ry12        | Purinergic receptor P2Y, G-protein coupled 12                   | 3.78                       |
| 240753  | Plekha6       | Pleckstrin homology domain containing, family A member 6        | 3.74                       |
| 53901   | Dscr111       | Down syndrome critical region gene 1-like 1                     | 3.72                       |
| 19736   | Rgs4          | Regulator of G-protein signaling 4                              | 3.58                       |
| 18798   | Plcb4         | Phospholipase C, beta 4                                         | 3.29                       |
| 74147   | Ehhadh        | Enoyl-Coenzyme A, hydratase/3-hydroxyacyl Coenzyme A            | 3.26                       |
| 20443   | Siat4c        | RIKEN cDNA 9330161A08 gene                                      | 3.24                       |
| 171170  | Mbnl3         | Muscleblind-like 3 (Drosophila)                                 | 3.19                       |
| 56353   | Rybp          | RING1 and YY1 binding protein                                   | 3.13                       |
| 13602   | Sparcl1       | SPARC-like 1 (mast9, hevin)                                     | 3.07                       |
| 18018   | Nfatc1        | Nuclear factor of activated T-cells, cytoplasmic                | 2.95                       |
| 27403   | Abca7         | ATP-binding cassette, sub-family A (ABC1), member 7             | 2.95                       |
| 80890   | Trim2         | Tripartite motif protein 2                                      | 2.86                       |
| 71602   | Myo1e         | Myosin IE                                                       | 2.76                       |
| 234199  | Fgl1          | Fibrinogen-like protein 1                                       | 2.71                       |
| 19332   | Rab20         | RAB20, member RAS oncogene family                               | 2.64                       |
| 209047  | Rgs19ip3      | Regulator of G-protein signaling 19 interacting protein 3       | 2.61                       |
| 26879   | B3galt3       | UDP-Gal:betaGlcNAc beta 1,3-galactosyltransferase               | 2.58                       |
| 12945   | Dmbt1         | Deleted in malignant brain tumors 1                             | 2.53                       |
| 20336   | Sec8l1        | SEC8-like 1 (S. cerevisiae)                                     | 2.37                       |
| 11898   | Ass1          | Argininosuccinate synthetase 1                                  | 2.35                       |
| 214855  | Arid5a        | AT rich interactive domain 5A (Mrf1 like)                       | 2.35                       |
| 20473   | Six3          | Sine oculis-related homeobox 3 homolog (Drosophila)             | 2.34                       |
| 30805   | Slc22a4       | Solute carrier family 22 (organic cation transporter), member 4 | 2.33                       |
| 23934   | Ly6h          | Lymphocyte antigen 6 complex, locus H                           | 2.31                       |
| 21835   | Thrsp         | Thyroid hormone responsive SPOT14 homolog (Rattus)              | 2.29                       |
| 56878   | Rbms1         | RIKEN cDNA 6030432P03 gene                                      | 2.22                       |
| 68337   | Crip2         | Cysteine rich protein 2                                         | 2.21                       |
| 231238  | 2310045A20Rik | RIKEN cDNA 2310045A20 gene                                      | 2.14                       |
| 14457   | Gas7          | Growth arrest specific 7                                        | 2.10                       |
| 11648   |               |                                                                 | 2.09                       |
| 227612  | A830007P12Rik | RIKEN cDNA A830007P12 gene                                      | 2.06                       |
| 214944  | Mobk12b       | MOB1, Mps One Binder kinase activator-like 2B (yeast)           | 2.02                       |
| 320982  | Arl7          | ADP-ribosylation factor-like 7                                  | 1.99                       |



|        |               |                                                                              |      |
|--------|---------------|------------------------------------------------------------------------------|------|
| 70551  | 4930403J22Rik | RIKEN cDNA 4930403J22 gene                                                   | 1.98 |
| 12825  | Col3a1        | Procollagen, type III, alpha 1                                               | 1.93 |
| 16660  | Krt1-1        | Keratin complex 1, acidic, gene 1                                            | 1.90 |
| 11749  | Anxa6         | Annexin A6                                                                   | 1.87 |
| 246228 | 4932416A11Rik | RIKEN cDNA 4932416A11 gene                                                   | 1.80 |
| 12587  | Mia1          | Melanoma inhibitory activity 1                                               | 1.73 |
| 12832  | Col5a2        | Procollagen, type V, alpha 2                                                 | 1.67 |
| 14164  | Fgf1          | Fibroblast growth factor 1                                                   | 1.67 |
| 17150  | Mfap2         | Microfibrillar-associated protein 2                                          | 1.64 |
| 227541 | Camk1d        | Calcium/calmodulin-dependent protein kinase ID                               | 1.61 |
| 19206  | Ptch1         | Patched homolog 1                                                            | 1.60 |
| 18164  | Nptx1         | Neuronal pentraxin 1                                                         | 1.59 |
| 29815  | Bcar3         | Breast cancer anti-estrogen resistance 3                                     | 1.56 |
| 69953  | 2810025M15Rik | RIKEN cDNA 2810025M15 gene                                                   | 1.52 |
| 56508  | Rapgef4       | RIKEN cDNA 6330581N18 gene                                                   | 1.52 |
| 68178  | 4933421H10Rik | RIKEN cDNA 4933421H10 gene                                                   | 1.51 |
| 60510  | Syt9          | Synaptotagmin 9                                                              | 1.46 |
| 11936  | Fxyd2         | FXVD domain-containing ion transport regulator 2                             | 1.46 |
| 52392  | D1Ertd622e    | DNA segment, Chr 1, ERATO Doi 622, expressed                                 | 1.45 |
| 12738  | Cldn2         | Claudin 2                                                                    | 1.44 |
| 56741  | Nope          | Neighbor of Punc E11                                                         | 1.43 |
| 58804  | Cdc42ep5      | CDC42 effector protein (Rho GTPase binding) 5                                | 1.41 |
| 26987  | Eif4e2        | Eukaryotic translation initiation factor 4E member 2                         | 1.39 |
| 67880  | Dcxr          | Dicarbonyl L-xylulose reductase                                              | 1.39 |
| 14114  | Fbln1         | Fibulin 1                                                                    | 1.38 |
| 18481  | Pak3          | P21 (CDKN1A)-activated kinase 3                                              | 1.37 |
| 214968 | Sema6d        | Sema domain, transmembrane domain <sup>TM</sup>                              | 1.36 |
| 75273  | 4930563C04Rik | RIKEN cDNA 4930563C04 gene                                                   | 1.35 |
| 20362  | 38968         | Septin 8                                                                     | 1.33 |
| 242687 | Wasf2         | WAS protein family, member 2                                                 | 1.27 |
| 19130  | Prox1         | Prospero-related homeobox 1                                                  | 1.27 |
| 12484  | Cd24a         | CD24a antigen                                                                | 1.19 |
| 14314  | Fstl1         | Follistatin-like 1                                                           | 1.19 |
| 66860  | 1200003E16Rik | RIKEN cDNA 1200003E16 gene                                                   | 1.14 |
| 114606 | Tle6          | Transducin-like enhancer of split 6, homolog of E(spl)                       | 1.13 |
| 21886  | Tle2          | Transducin-like enhancer of split 2, homolog of Drosophila E(spl)            | 1.12 |
| 18081  | Ninj1         | Ninjurin 1                                                                   | 1.11 |
| 78896  | 1500015O10Rik | RIKEN cDNA 1500015O10 gene                                                   | 1.10 |
| 18845  | Plxna2        | Plexin A2                                                                    | 1.07 |
| 20454  | Siat9         | Sialyltransferase 9 (CMP-NeuAc:lactosylceramide alpha-2,3-sialyltransferase) | 1.07 |
| 224014 | Fgd4          | FYVE, RhoGEF and PH domain containing 4                                      | 1.06 |

|        |               |                                                                 |      |
|--------|---------------|-----------------------------------------------------------------|------|
| 19266  | Ptprd         | Protein tyrosine phosphatase, receptor type, D                  | 1.05 |
| 56405  | Dusp14        | Dual specificity phosphatase 14                                 | 1.02 |
| 56214  | Scamp4        | Secretory carrier membrane protein 4                            | 0.98 |
| 59126  | Nek6          | NIMA (never in mitosis gene a)-related expressed kinase 6       | 0.97 |
| 74134  | Cyp2s1        | Cytochrome P450, family 2, subfamily s, polypeptide 1           | 0.96 |
| 246102 | Rttn          | Rotatin                                                         | 0.95 |
| 216134 | Pdxk          | Pyridoxal (pyridoxine, vitamin B6) kinase                       | 0.93 |
| 78255  | Ralgps2       | Ral GEF with PH domain and SH3 binding motif 2                  | 0.93 |
| 68095  | Ociad1        | OCIA domain containing 1                                        | 0.92 |
| 66940  | Scotin        | Scotin gene                                                     | 0.90 |
| 78248  | Armcx1        | Armadillo repeat containing, X-linked 1                         | 0.90 |
| 67815  | Sec14l2       | SEC14-like 2 ( <i>S. cerevisiae</i> )                           | 0.90 |
| 16522  | Kcnj6         | Potassium inwardly-rectifying channel, subfamily J, member 6    | 0.85 |
| 217038 | A530065E19Rik | RIKEN cDNA A530065E19 gene                                      | 0.84 |
| 23872  | Ets2          | E26 avian leukemia oncogene 2, 3' domain                        | 0.82 |
| 170753 |               |                                                                 | 0.79 |
| 110391 | Qdpr          | Quininoid dihydropteridine reductase                            | 0.79 |
| 230793 | D030015G18Rik | RIKEN cDNA D030015G18 gene                                      | 0.79 |
| 14950  | H13           | Histocompatibility 13                                           | 0.79 |
| 60595  | Actn4         | Actinin alpha 4                                                 | 0.78 |
| 19303  | Pxn           | Paxillin                                                        | 0.78 |
| 67883  | Uxs1          | UDP-glucuronate decarboxylase 1                                 | 0.78 |
| 353282 | Sfmbt2        | Scm-like with four mbt domains 2                                | 0.77 |
| 20602  | Ncor2         | Nuclear receptor co-repressor 2                                 | 0.76 |
| 215114 | Hip1          | Huntingtin interacting protein 1                                | 0.76 |
| 218763 | Lrrc3b        | Leucine rich repeat containing 3B                               | 0.75 |
| 13030  | Ctsb          | Cathepsin B                                                     | 0.75 |
| 107975 | Pacs1         | RIKEN cDNA D430030G11 gene                                      | 0.75 |
| 26394  | Lypla2        | Lysophospholipase 2                                             | 0.74 |
| 50875  | Tmod3         | Tropomodulin 3                                                  | 0.74 |
| 105859 | AI481750      | Expressed sequence AI481750                                     | 0.74 |
| 70772  | Ggnbp1        | Gametogenetin binding protein 1                                 | 0.71 |
| 12839  | Col9a1        | Procollagen, type IX, alpha 1                                   | 0.71 |
| 24063  | Spry1         | Sprouty homolog 1 ( <i>Drosophila</i> )                         | 0.71 |
| 77569  | 3732412D22Rik | RIKEN cDNA 3732412D22 gene                                      | 0.71 |
| 12874  | Cpd           | Carboxypeptidase D                                              | 0.70 |
| 22682  | Za20d2        | Zinc finger, A20 domain containing 2                            | 0.69 |
| 11784  | Apba2         | Amyloid beta (A4) precursor protein-binding, family A, member 2 | 0.69 |
| 99152  | Anapc2        | Anaphase promoting complex subunit 2                            | 0.66 |
| 106522 | AW548124      | Expressed sequence AW548124                                     | 0.66 |
| 50786  | Hs6st2        | Heparan sulfate 6-O-sulfotransferase 2                          | 0.64 |
| 235431 | Coro2b        | Coronin, actin binding protein, 2B                              | 0.62 |
| 70575  | 5730466C23Rik | RIKEN cDNA 5730466C23 gene                                      | 0.62 |

|        |               |                                                                                              |      |
|--------|---------------|----------------------------------------------------------------------------------------------|------|
| 240913 | Adamts4       | A disintegrin-like and metalloprotease (reprolysin type) with thrombospondin type 1 motif, 4 | 0.60 |
| 12593  | Cdyl          | Chromodomain protein, Y chromosome-like                                                      | 0.60 |
| 50914  | Olig1         | Oligodendrocyte transcription factor 1                                                       | 0.59 |
| 75751  | Ipo4          | Importin 4                                                                                   | 0.58 |
| 217370 | BC017643      | CDNA sequence BC017643                                                                       | 0.57 |
| 56876  | Nelf          | Nasal embryonic LHRH factor                                                                  | 0.57 |
| 16795  | Large         | RIKEN cDNA B930093H17 gene                                                                   | 0.56 |
| 229473 | D930015E06Rik | RIKEN cDNA D930015E06 gene                                                                   | 0.55 |
| 320011 | Ugcgl1        | UDP-glucose ceramide glucosyltransferase-like 1                                              | 0.55 |
| 67554  | Slc25a30      | Solute carrier family 25, member 30                                                          | 0.55 |
| 80515  | A030009H04Rik | RIKEN cDNA A030009H04 gene                                                                   | 0.54 |
| 19248  | Ptpn12        | Protein tyrosine phosphatase, non-receptor type 12                                           | 0.53 |
| 12142  | Prdm1         | PR domain containing 1, with ZNF domain                                                      | 0.52 |
| 12575  | Cdkn1a        | Cyclin-dependent kinase inhibitor 1A (P21)                                                   | 0.50 |
| 234407 | Glt25d1       | Glycosyltransferase 25 domain containing 1                                                   | 0.50 |
| 20742  | Spnb2         | Spectrin beta 2                                                                              | 0.49 |
| 16976  | Lrpap1        | Low density lipoprotein receptor-related protein associated protein 1                        | 0.49 |
| 67298  | Gprasp1       | G protein-coupled receptor associated sorting protein 1                                      | 0.48 |
| 93836  | Rnf111        | Ring finger 111                                                                              | 0.47 |
| 16451  | Jak1          | Janus kinase 1                                                                               | 0.42 |
| 14265  | Fmr1          | Fragile X mental retardation syndrome 1 homolog                                              | 0.41 |
| 19342  | Rab4b         | RAB4B, member RAS oncogene family                                                            | 0.40 |
| 22401  | Wig1          | Wild-type p53-induced gene 1                                                                 | 0.39 |
| 66646  | Rpe           | Ribulose-5-phosphate-3-epimerase                                                             | 0.39 |
| 12751  | Cln2          | Ceroid-lipofuscinosis, neuronal 2                                                            | 0.39 |
| 17122  | Mxd4          | RIKEN cDNA 2810410A03 gene                                                                   | 0.38 |
| 13043  | Cttn          | Cortactin                                                                                    | 0.36 |
| 216856 | Nlgn2         | Neuroigin 2                                                                                  | 0.36 |
| 54383  | Phc2          | Polyhomeotic-like 2 (Drosophila)                                                             | 0.36 |
| 66494  | 2610524G07Rik | RIKEN cDNA 2610524G07 gene                                                                   | 0.36 |
| 107338 | Gbf1          | Golgi-specific brefeldin A-resistance factor 1                                               | 0.33 |
| 12660  | Chka          | Choline kinase alpha                                                                         | 0.33 |
| 16202  | Ilk           | Integrin linked kinase                                                                       | 0.30 |
| 26951  | Zw10          | ZW10 homolog (Drosophila), centromere/kinetochore protein                                    | 0.30 |
| 13018  | Ctcf          | CCCTC-binding factor                                                                         | 0.29 |
| 53599  | Cd164         | CD164 antigen                                                                                | 0.25 |
| 26430  | Parg          | Poly (ADP-ribose) glycohydrolase                                                             | 0.25 |
| 28088  | D10Wsu52e     | DNA segment, Chr 10, Wayne State University 52, expressed                                    | 0.24 |
| 320717 | 9130017A15Rik | RIKEN cDNA 9130017A15 gene                                                                   | 0.19 |
| 54401  | Ywhab         | Tyrosine 3-monooxygenase/tryptophan 5-monooxygenase activation protein, beta polypeptide     | 0.17 |
| 14489  | Mtpn          | Myotrophin                                                                                   | 0.10 |
| 110954 | Rpl10         | Ribosomal protein 10                                                                         | 0.06 |

|       |        |                                                 |      |
|-------|--------|-------------------------------------------------|------|
| 19896 | Rpl10a | Ribosomal protein L10A                          | 0.05 |
| 16898 | Rps2   | Phosphodiesterase 6A, cGMP-specific, rod, alpha | 0.05 |
| 66480 | Rpl15  | Ribosomal protein L15                           | 0.05 |

**Supplemental Table 3.** E-box containing genes with upregulated expression in olig-2 null mice. Genes related to the p53 signaling axis are highlighted in red. See Figure 6 for methods.

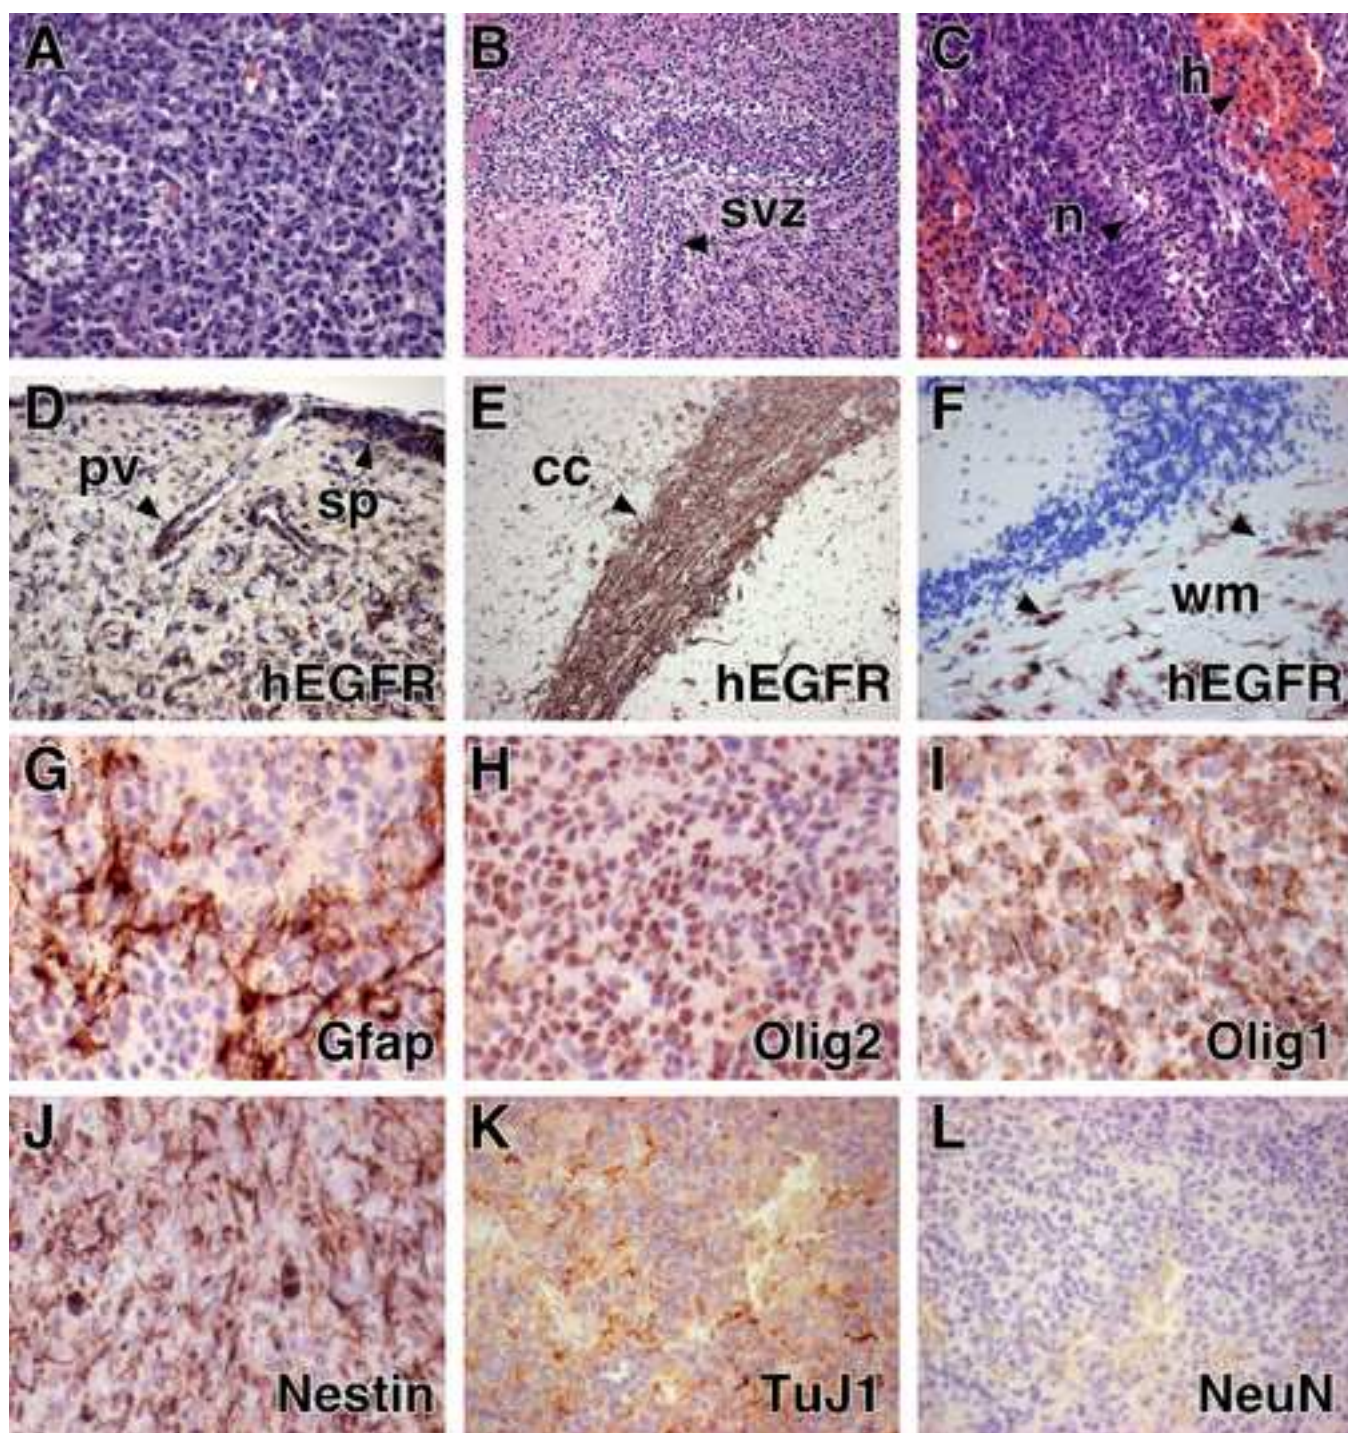

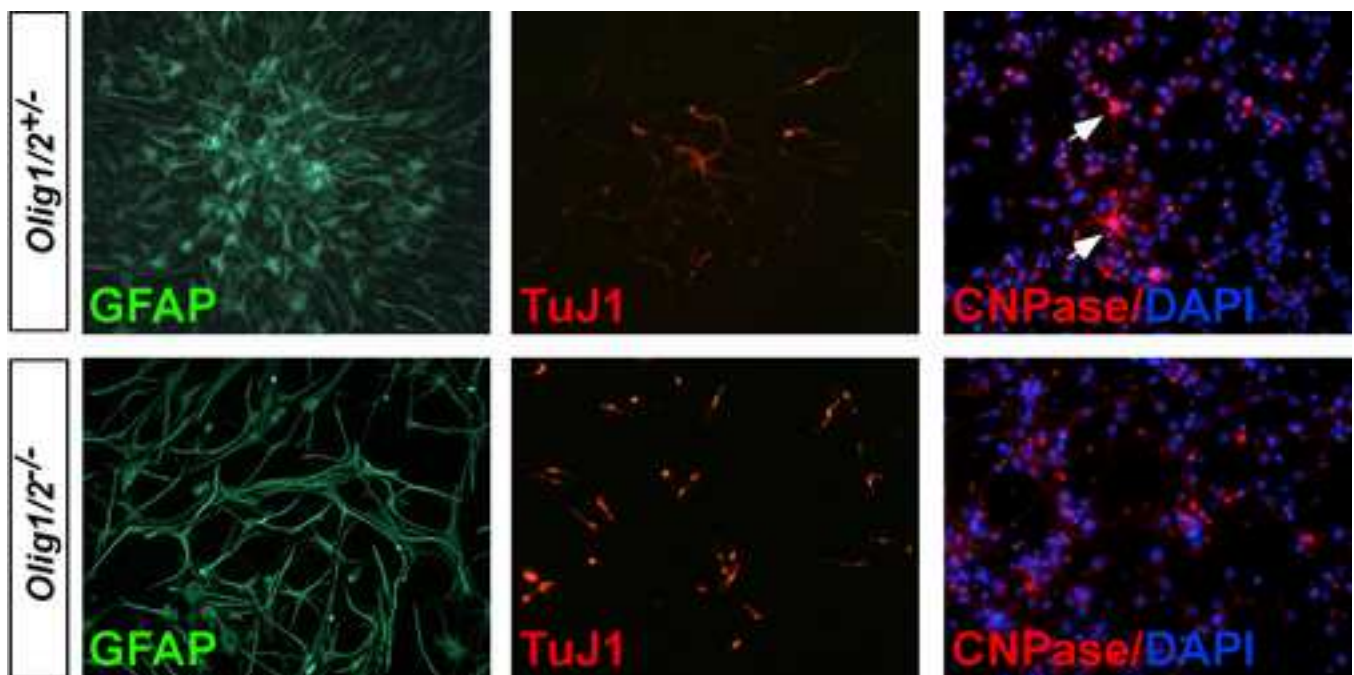

Supplement: NIHMS18231-supplement-01.pdf [file NIHMS18231-supplement-01.pdf]
